# Supplementary material
Source: PubMed Central journal article supplement (PMC2043024)

Fig. 1-44. MS/MS spectra of the N-terminally arginylated peptides for proteins shown in Table 1 of the main text. Peptide sequence, accession number, and protein name are listed on top of each spectrum. N-terminally arginylated I, Q, and R were not found. One protein was found to be arginylated on initiator Met (Figure 19) and two more cases of arginylation on internal Met have been found (Figures 5 and 20).

# Figure 1

RLYANNVLSGGTTMYPGIADR

>gi|14192922|ref|NP\_033738.1| actin, alpha, cardiac

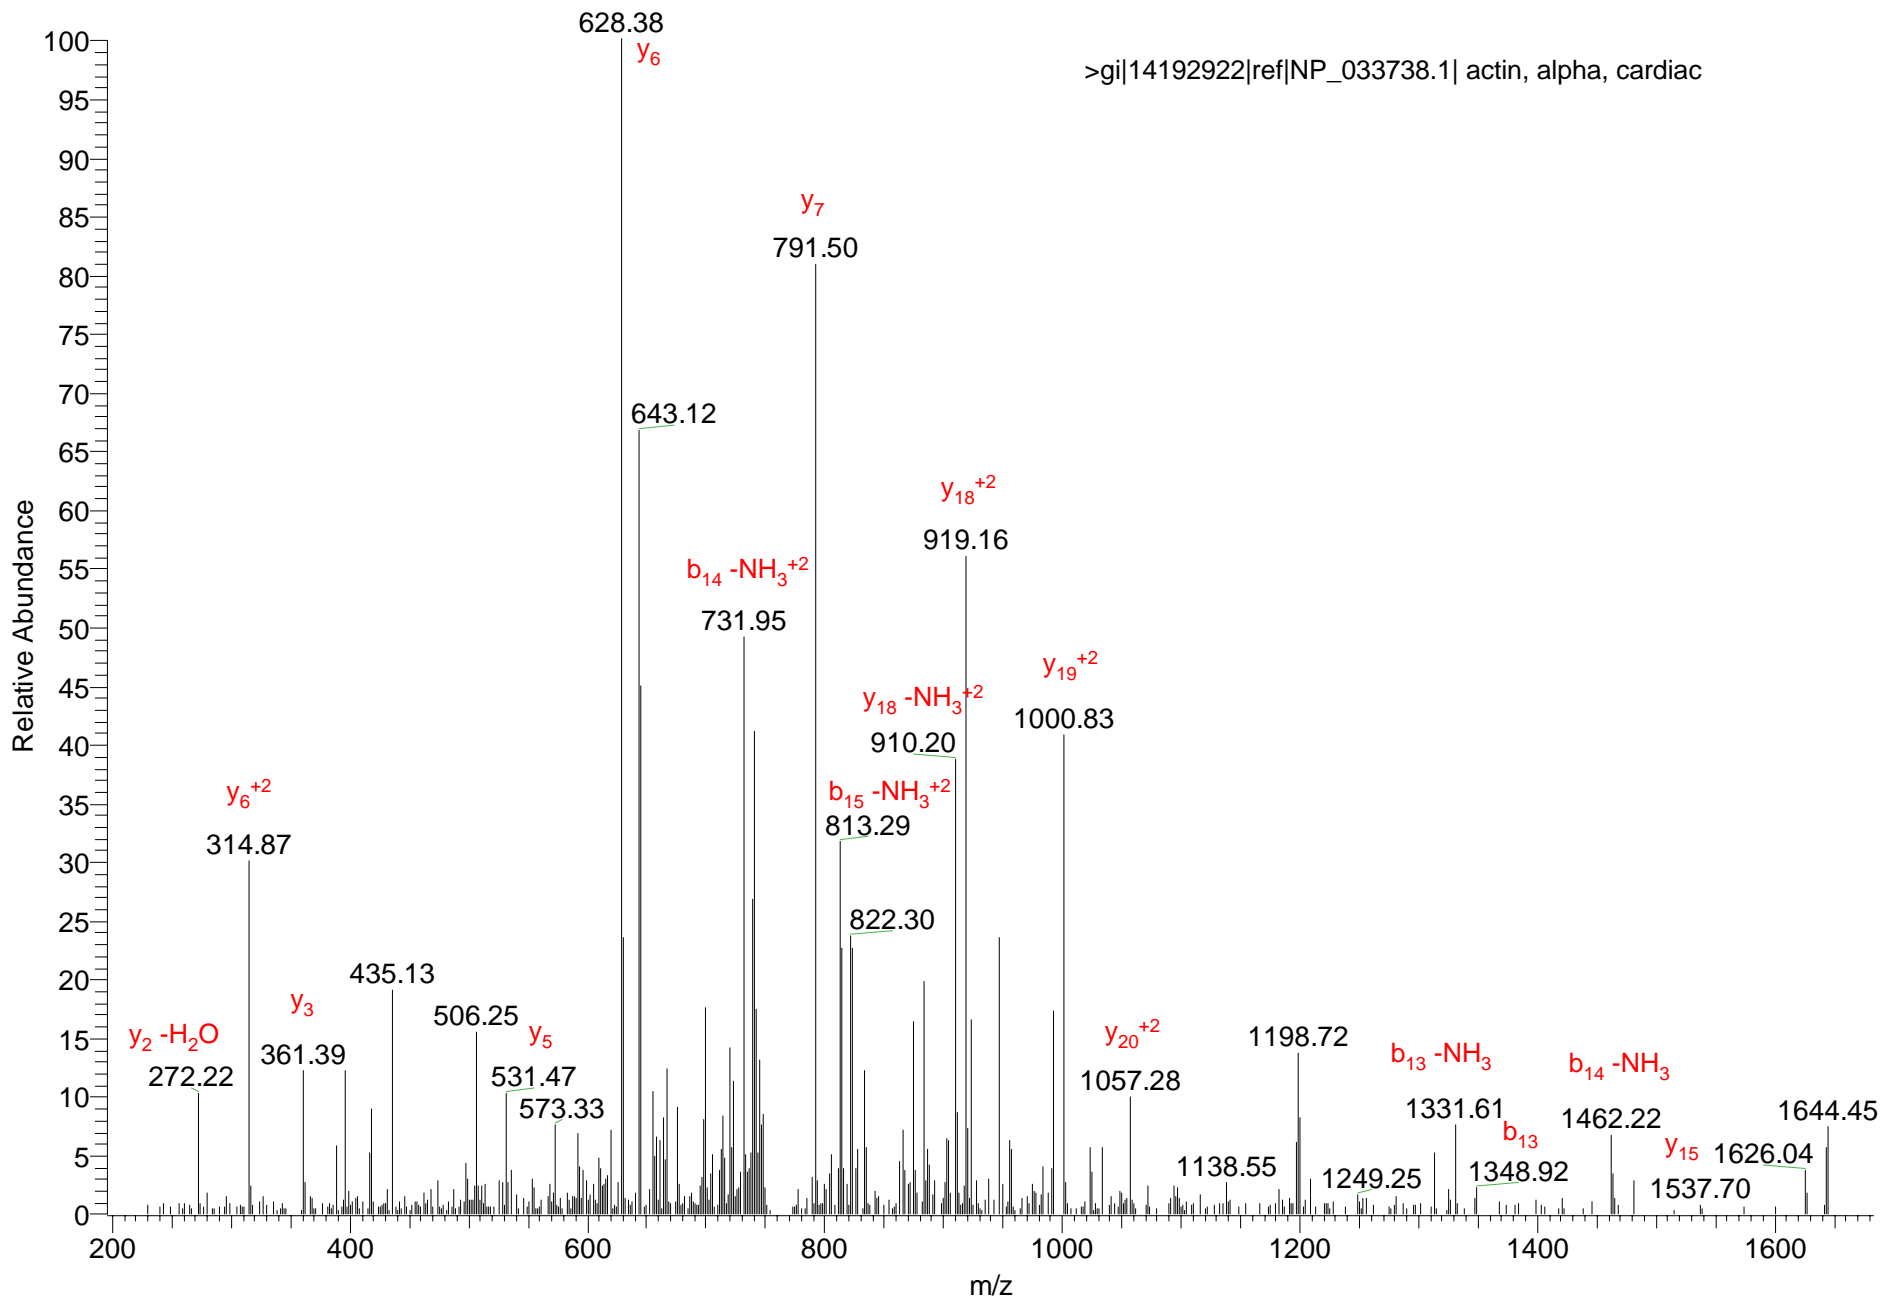

# Figure 2

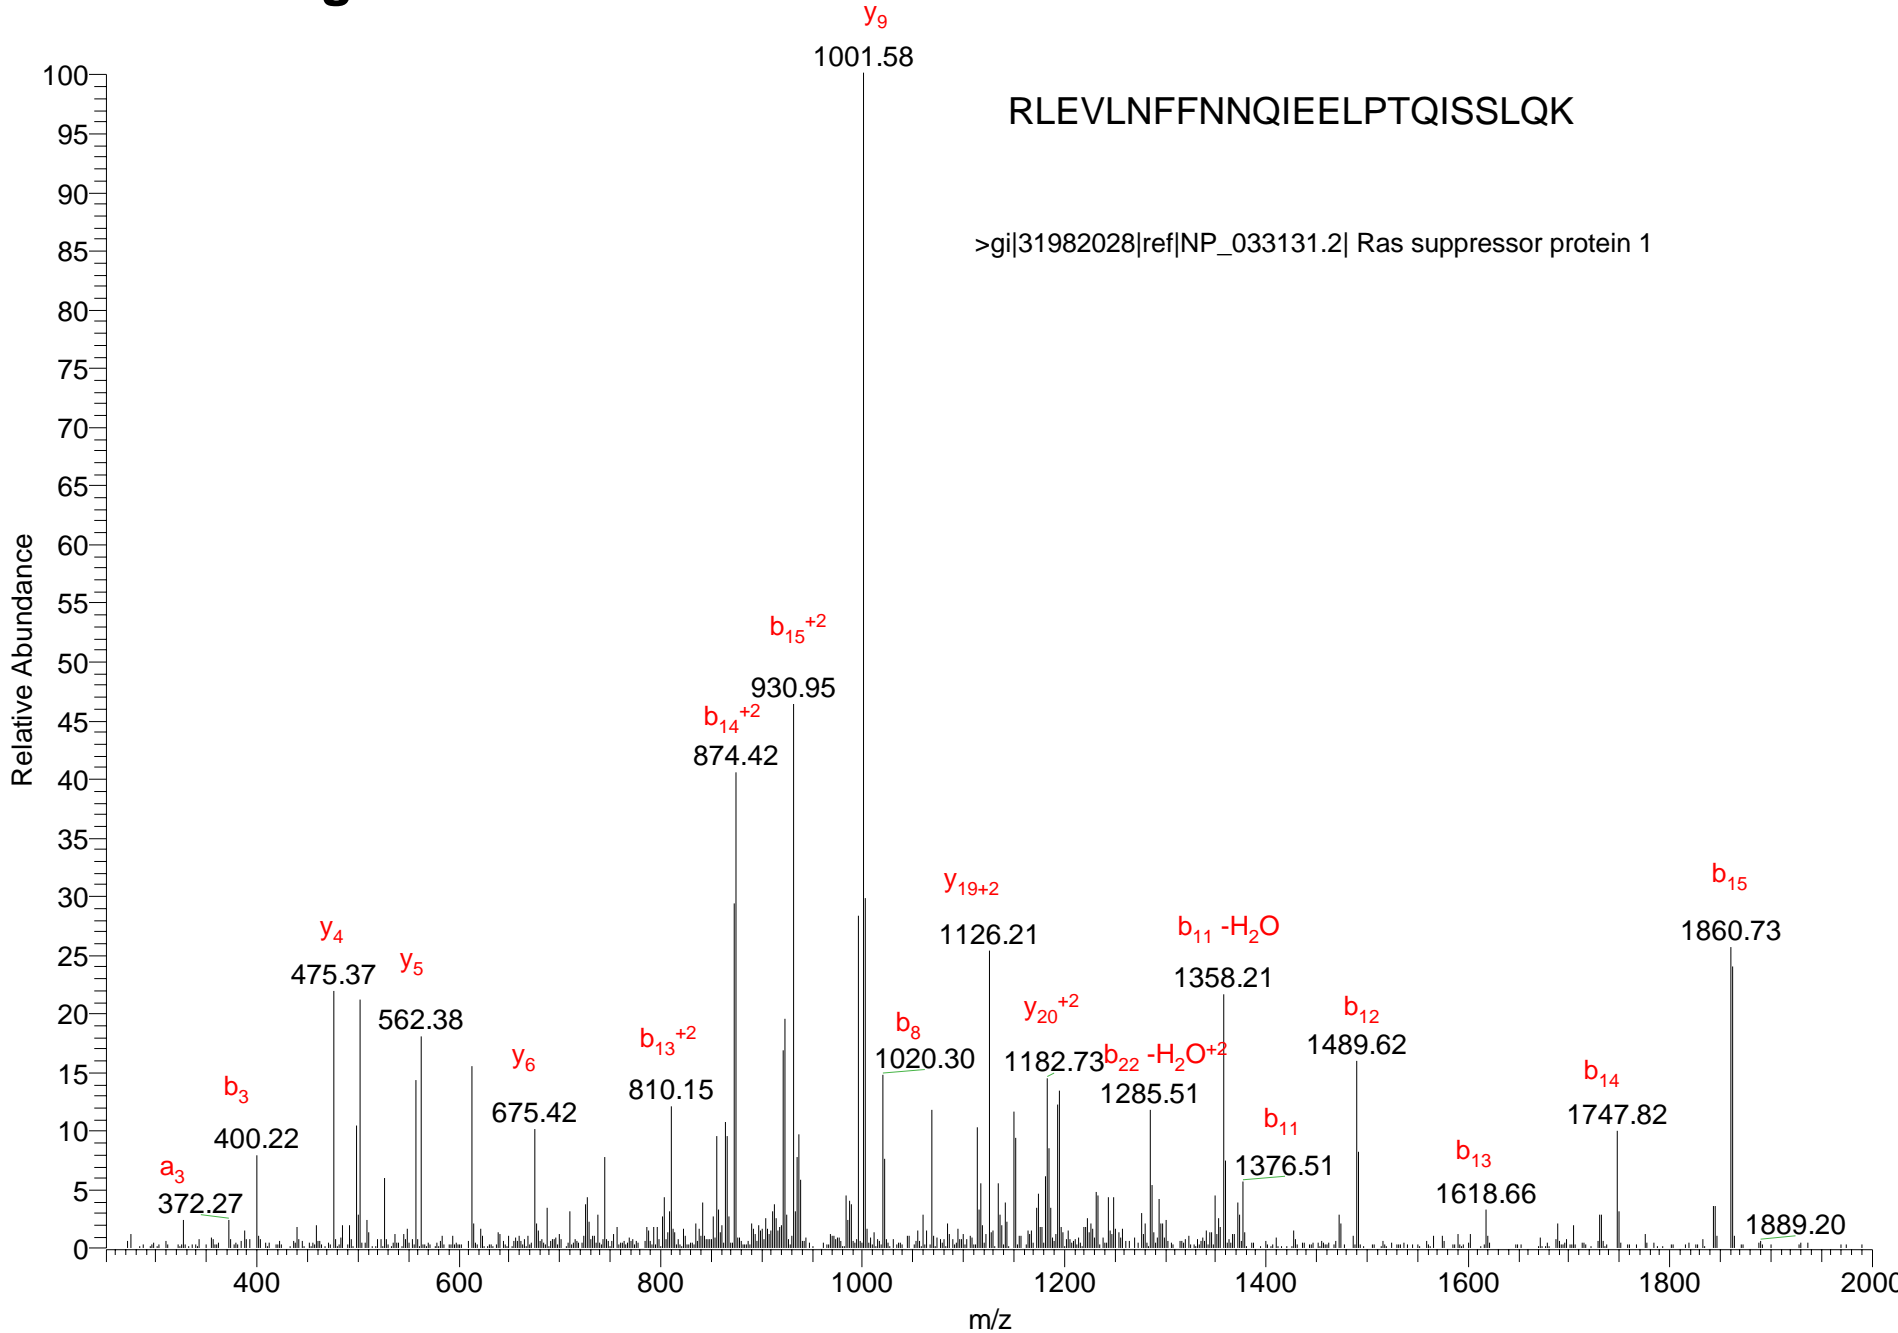

# Figure 3

MH-CH<sub>3</sub>CO

1198.52

1224.47

MH-NH<sub>3</sub>

RSYVGDEAQS<sub>K</sub>

>gi|6671509|ref|NP\_031419.1| actin, beta, cytoplasmic

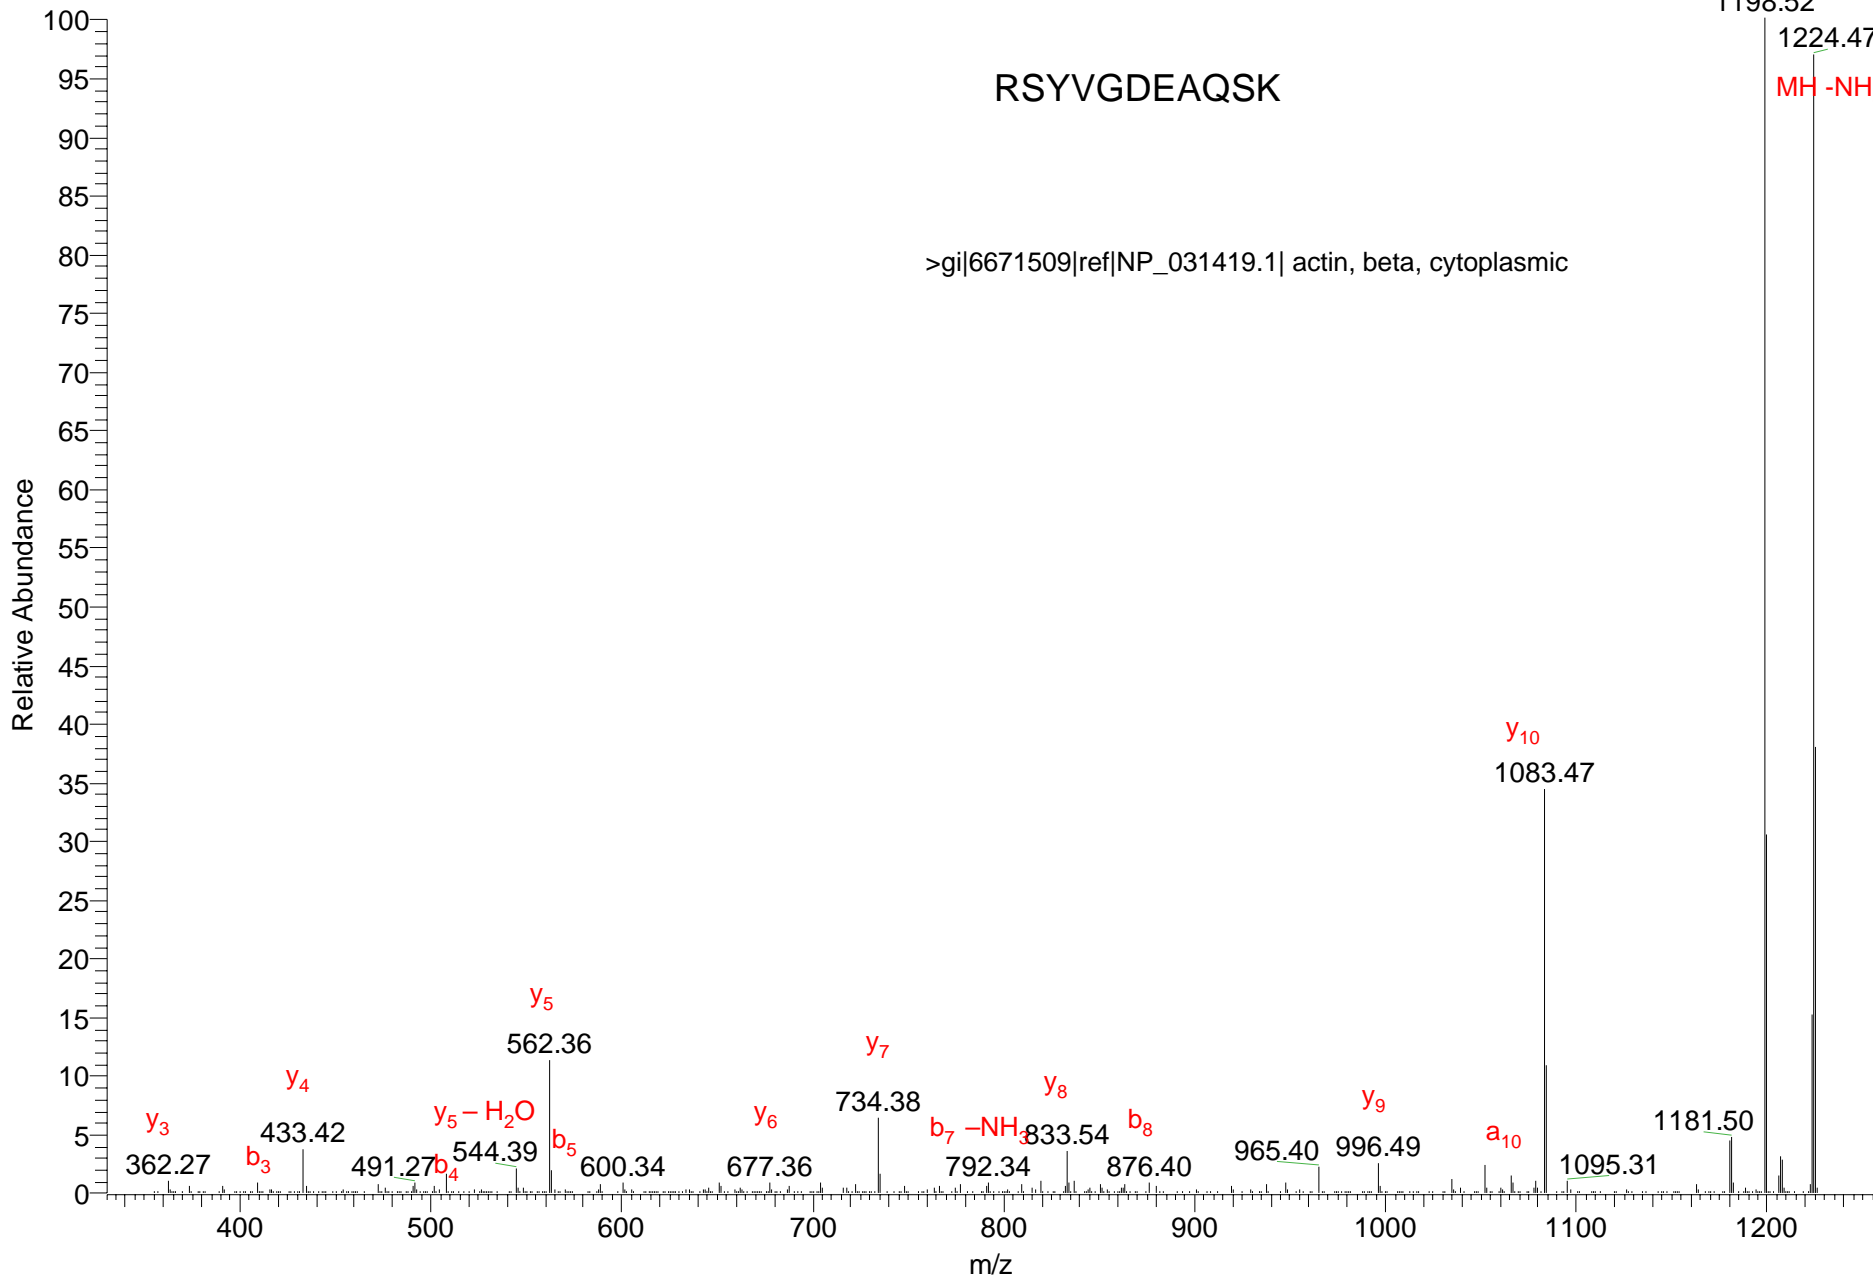

# Figure 4

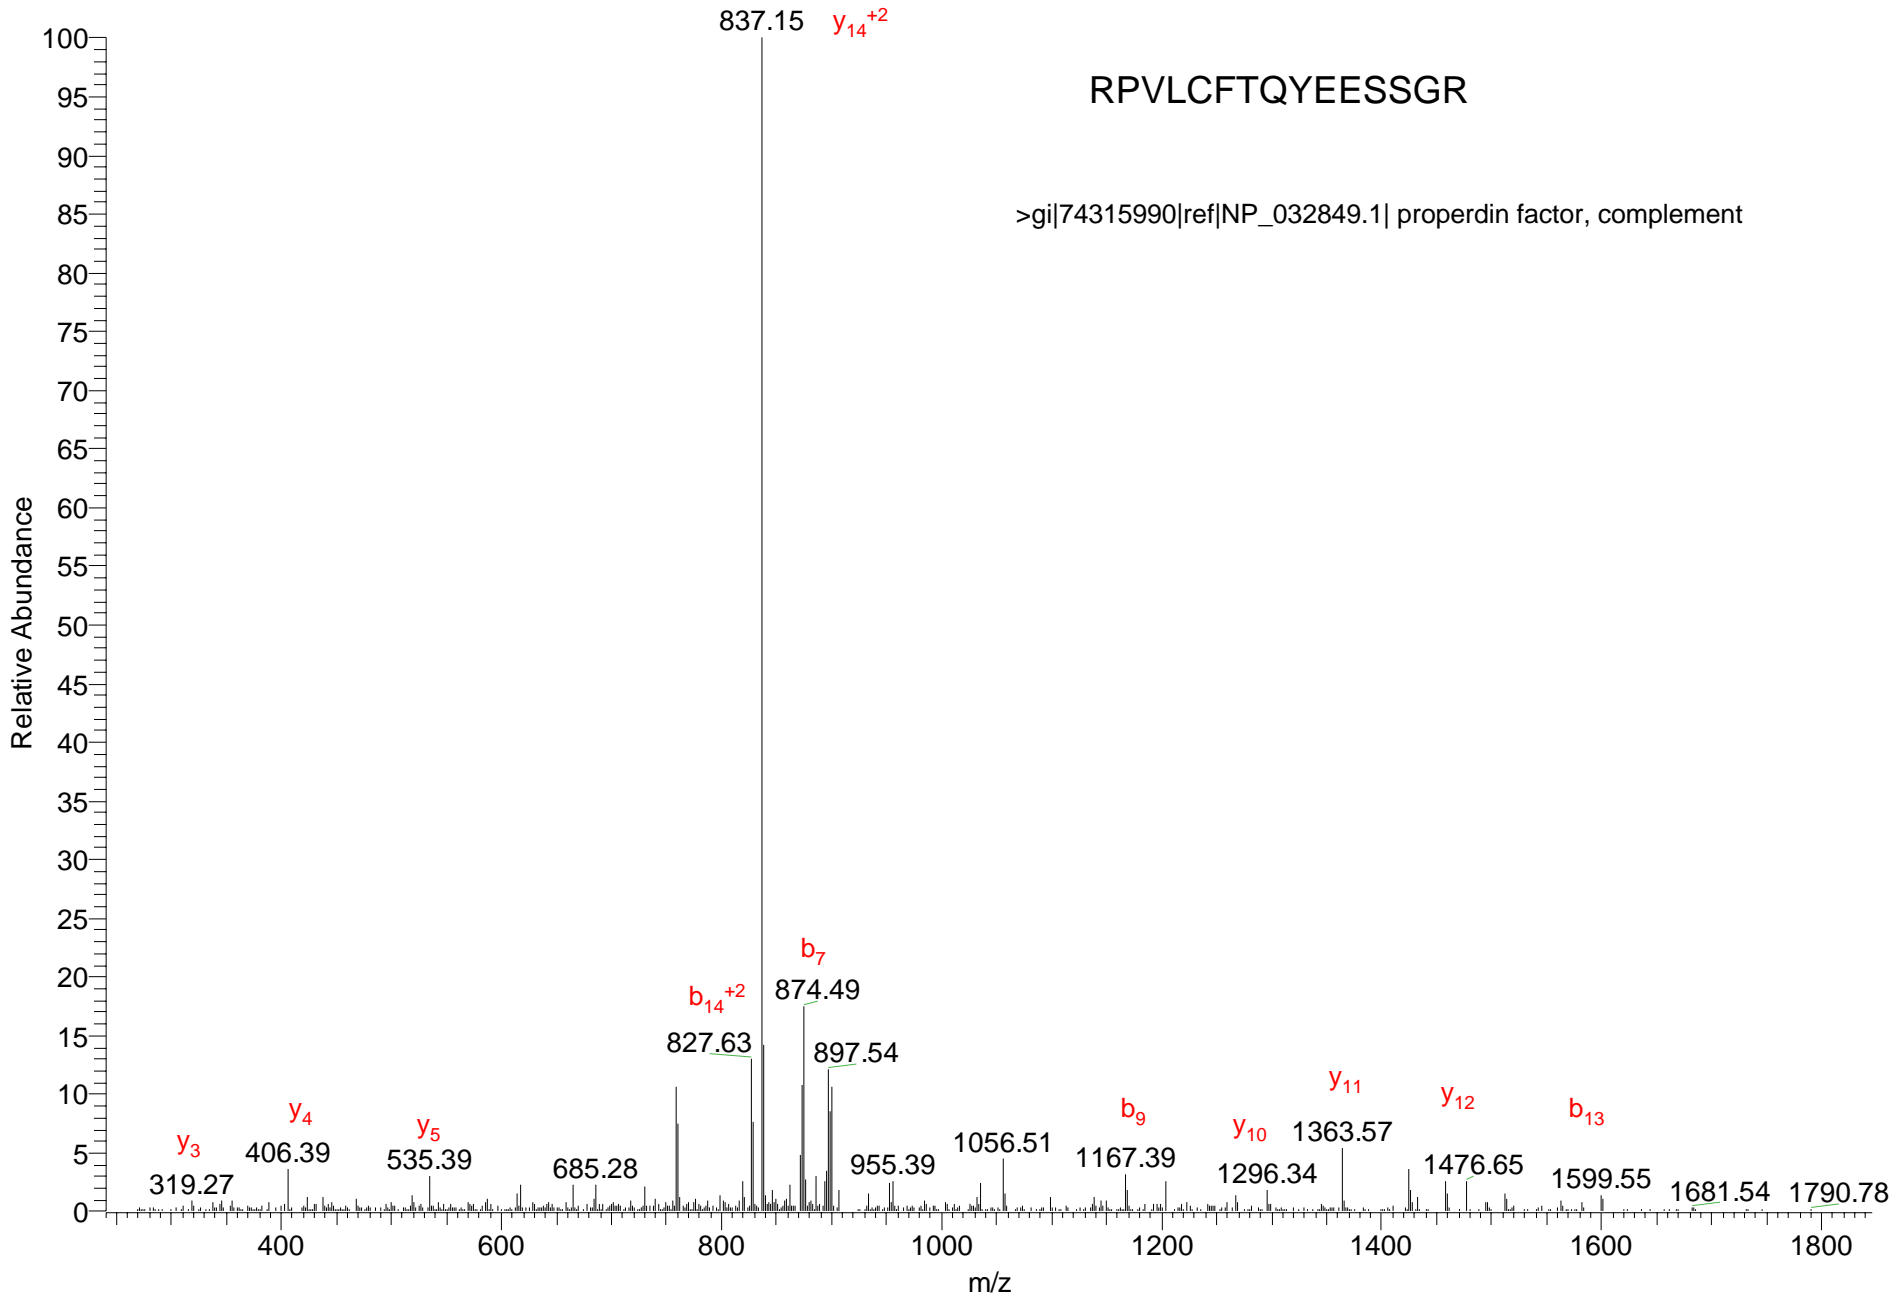

# Figure 5

>gi|20137006|ref|NP\_071855.1| myosin, heavy polypeptide 9, non-muscle isoform 1

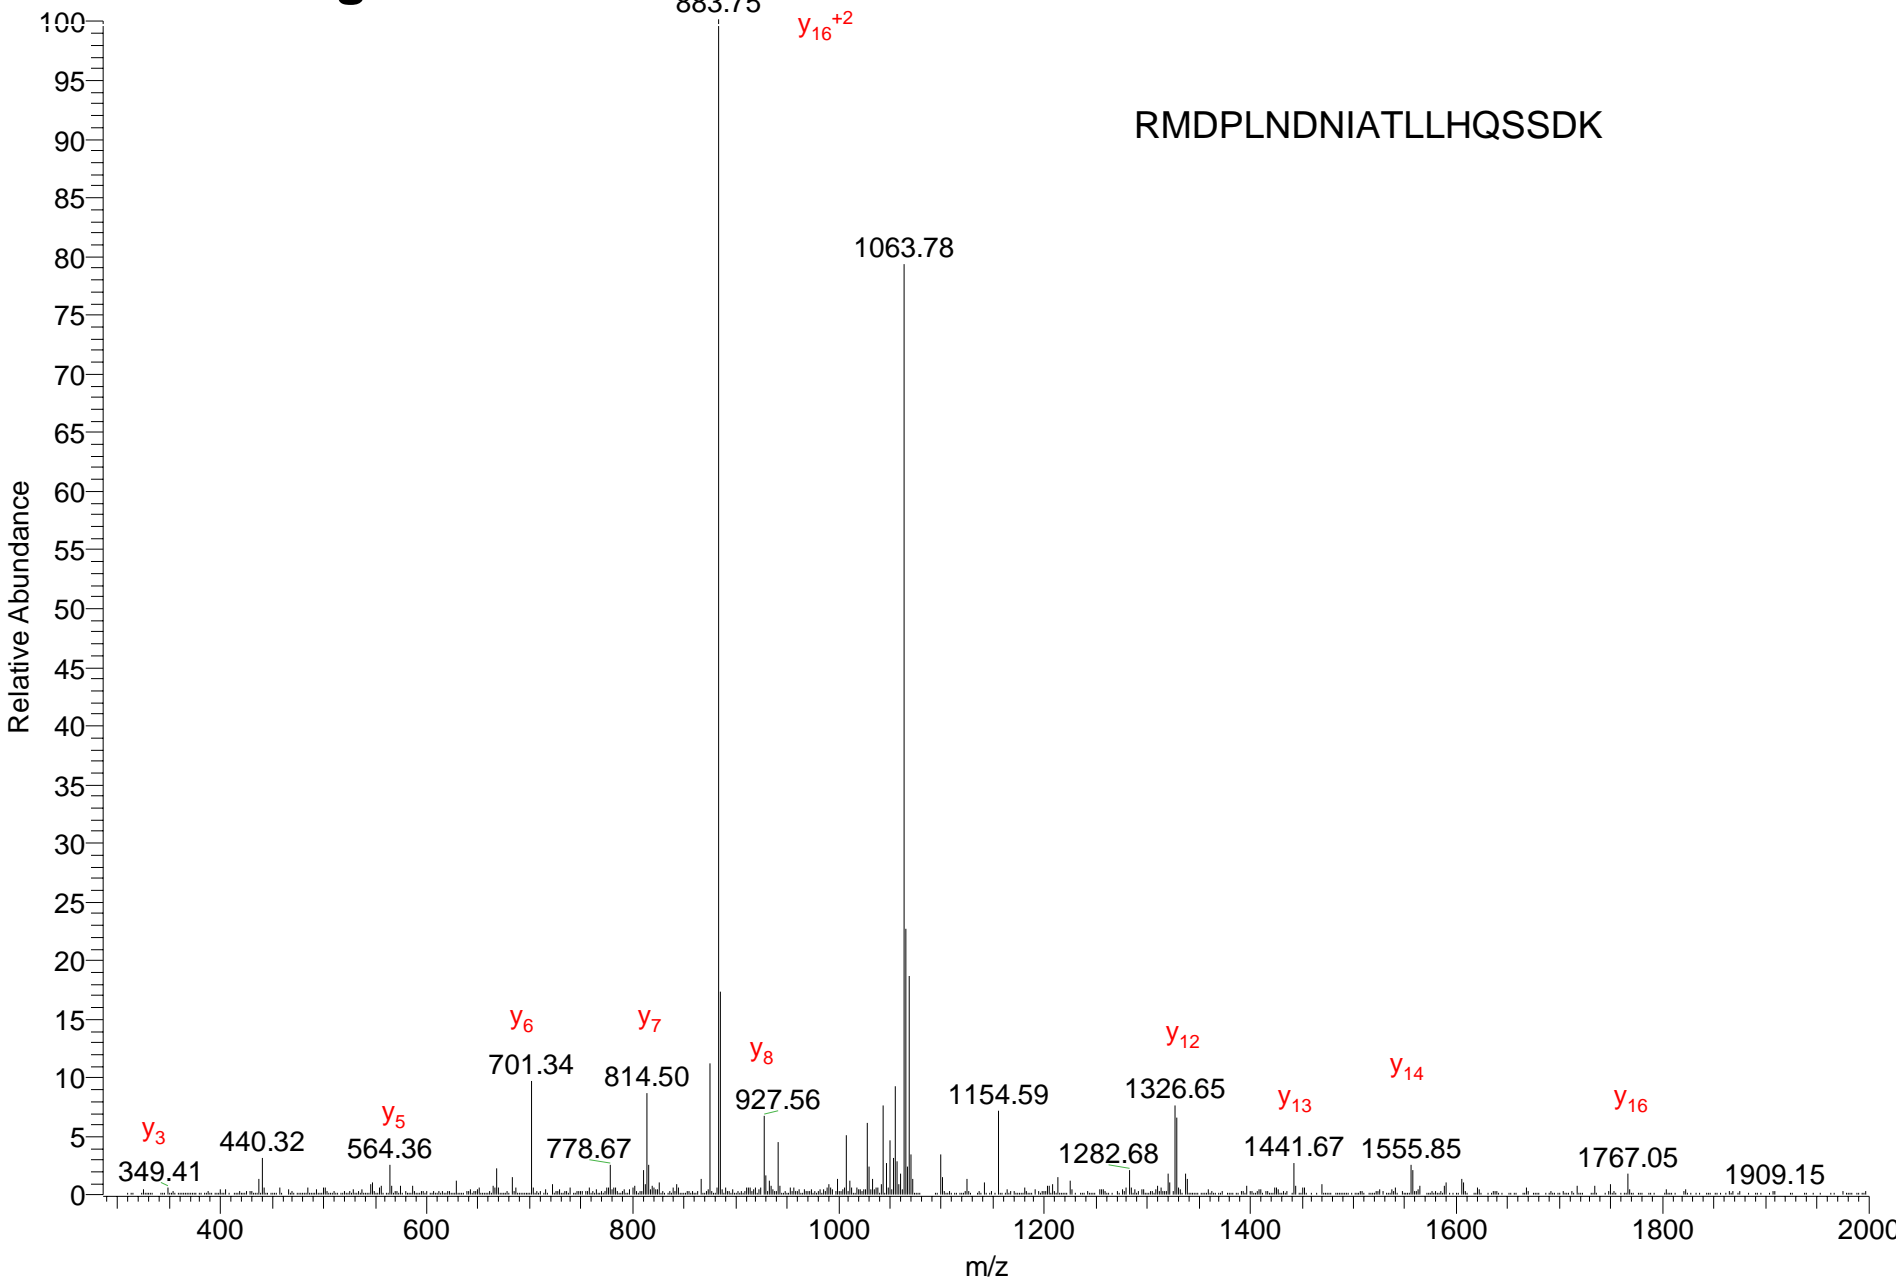

# Figure 6

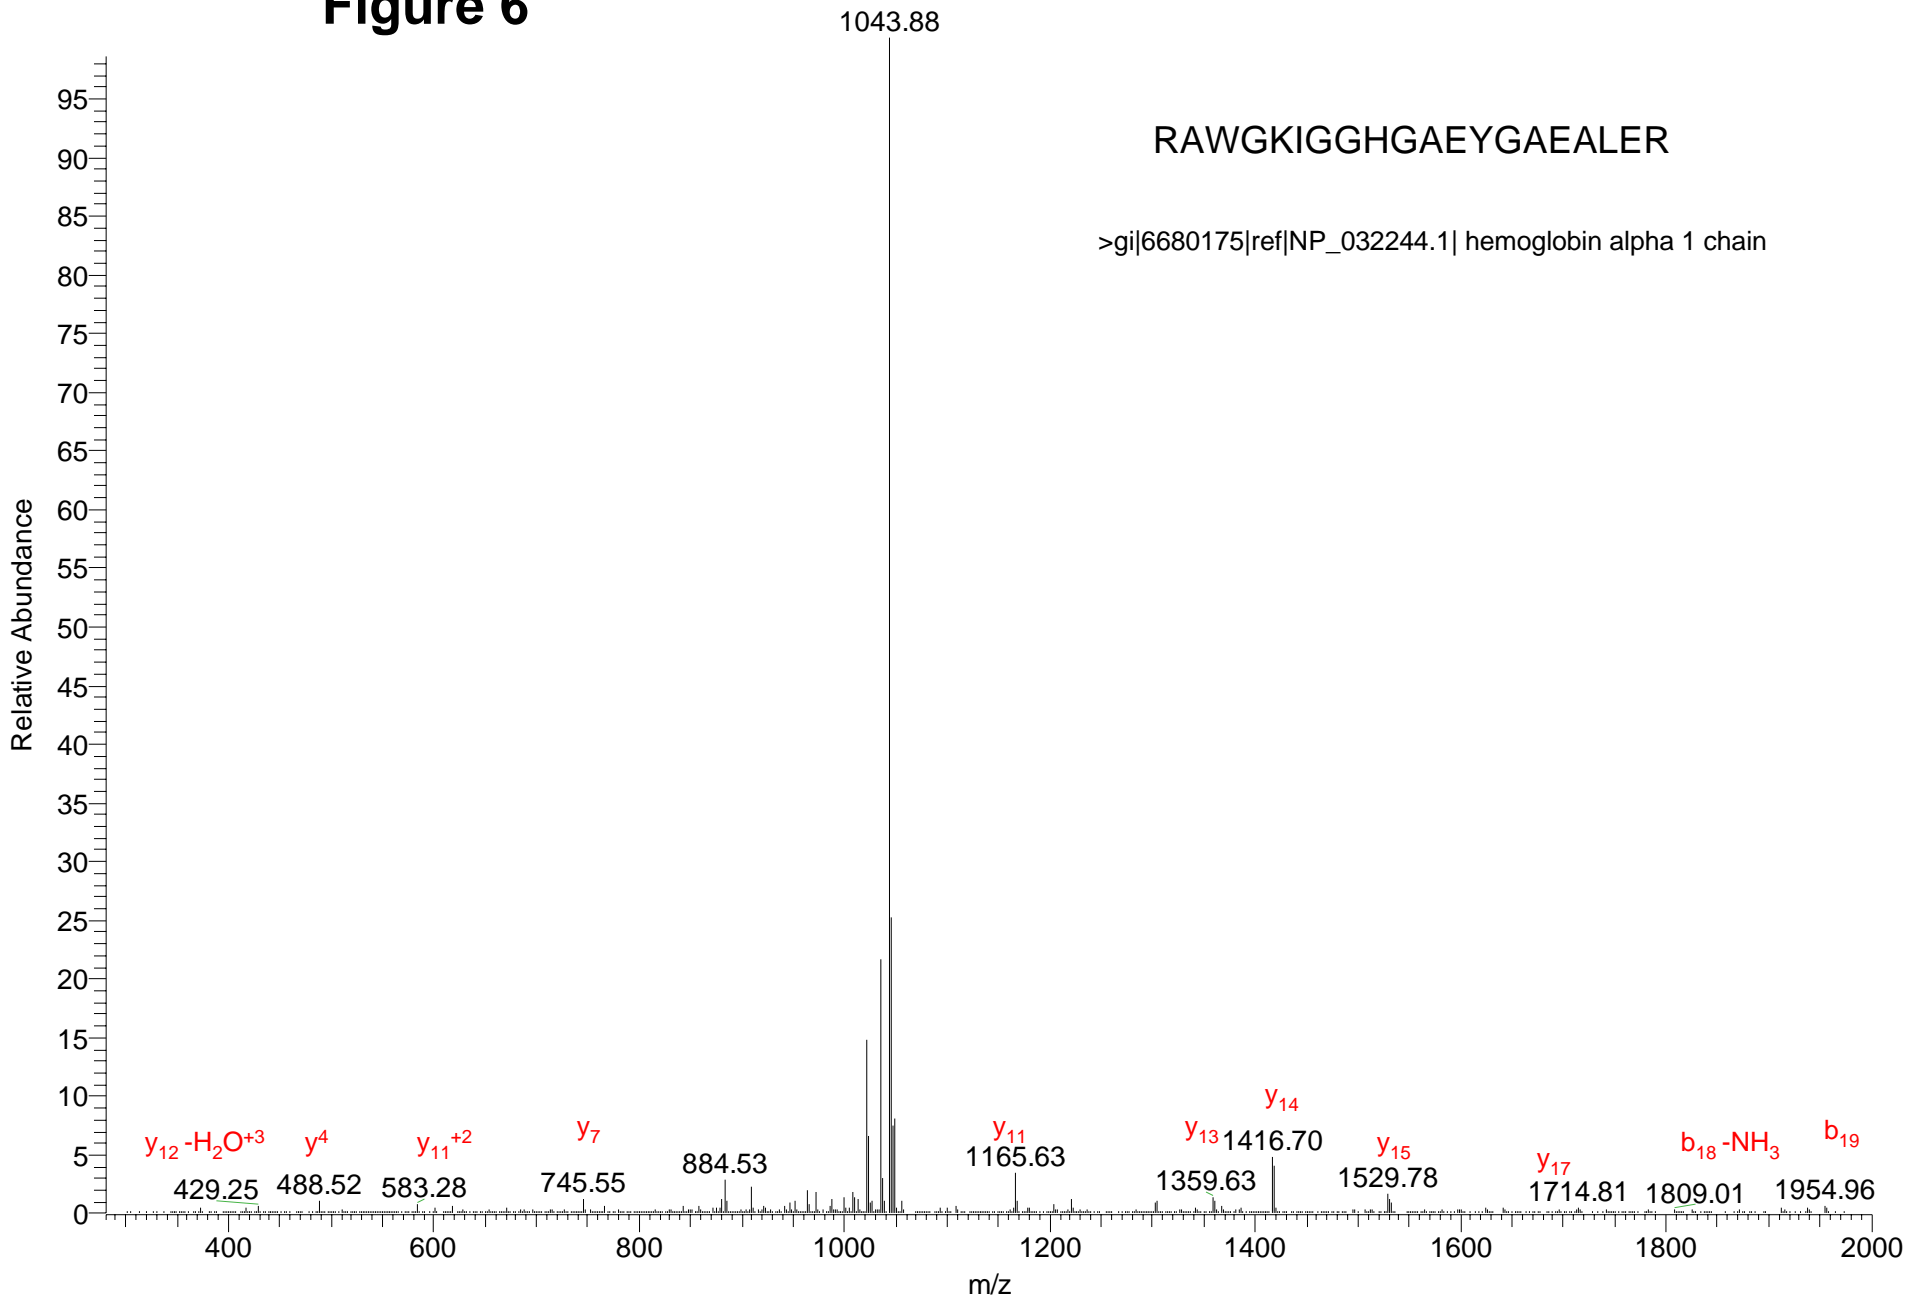

# Figure 7

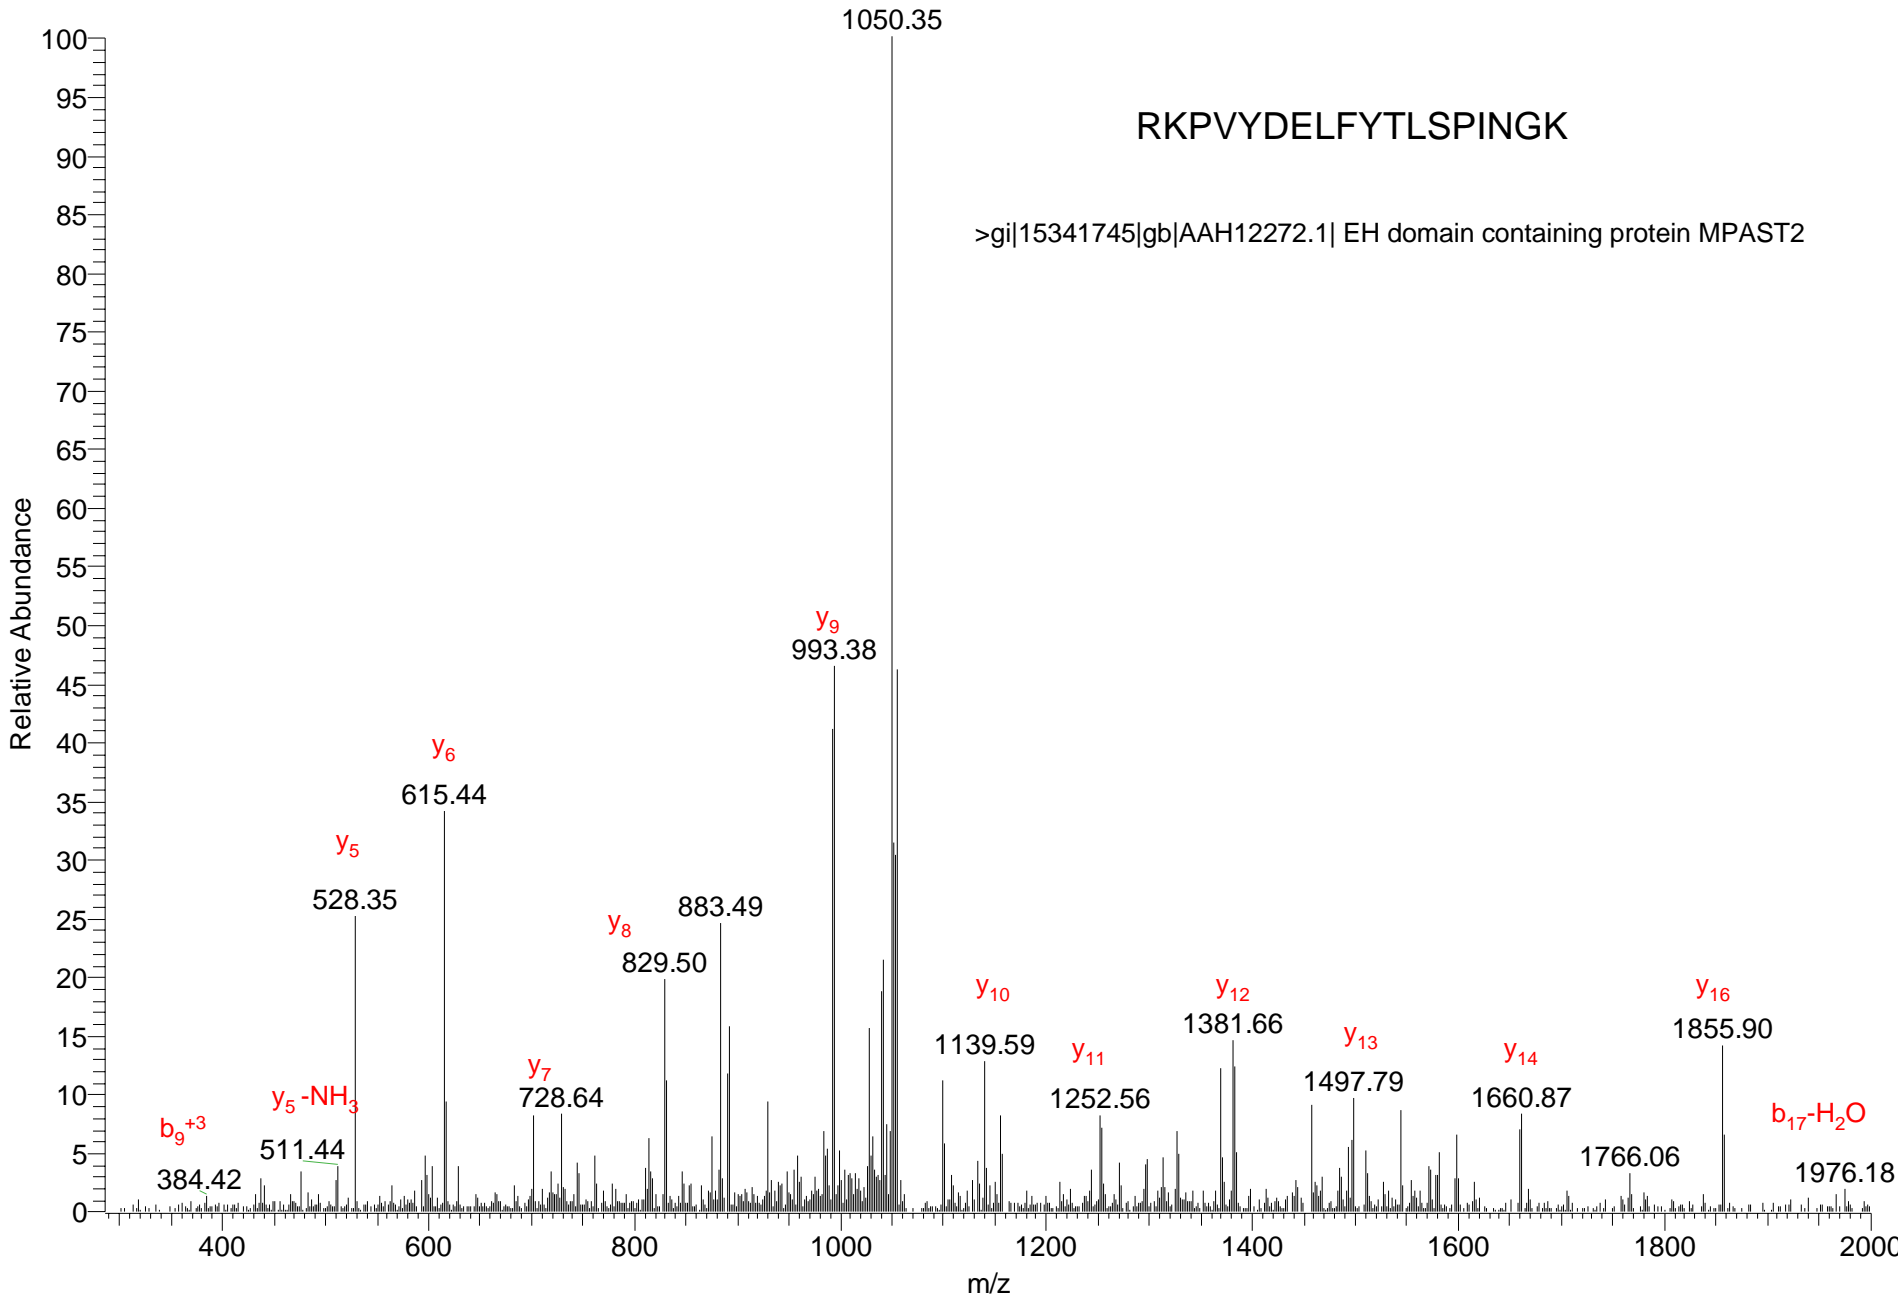



# Figure 8

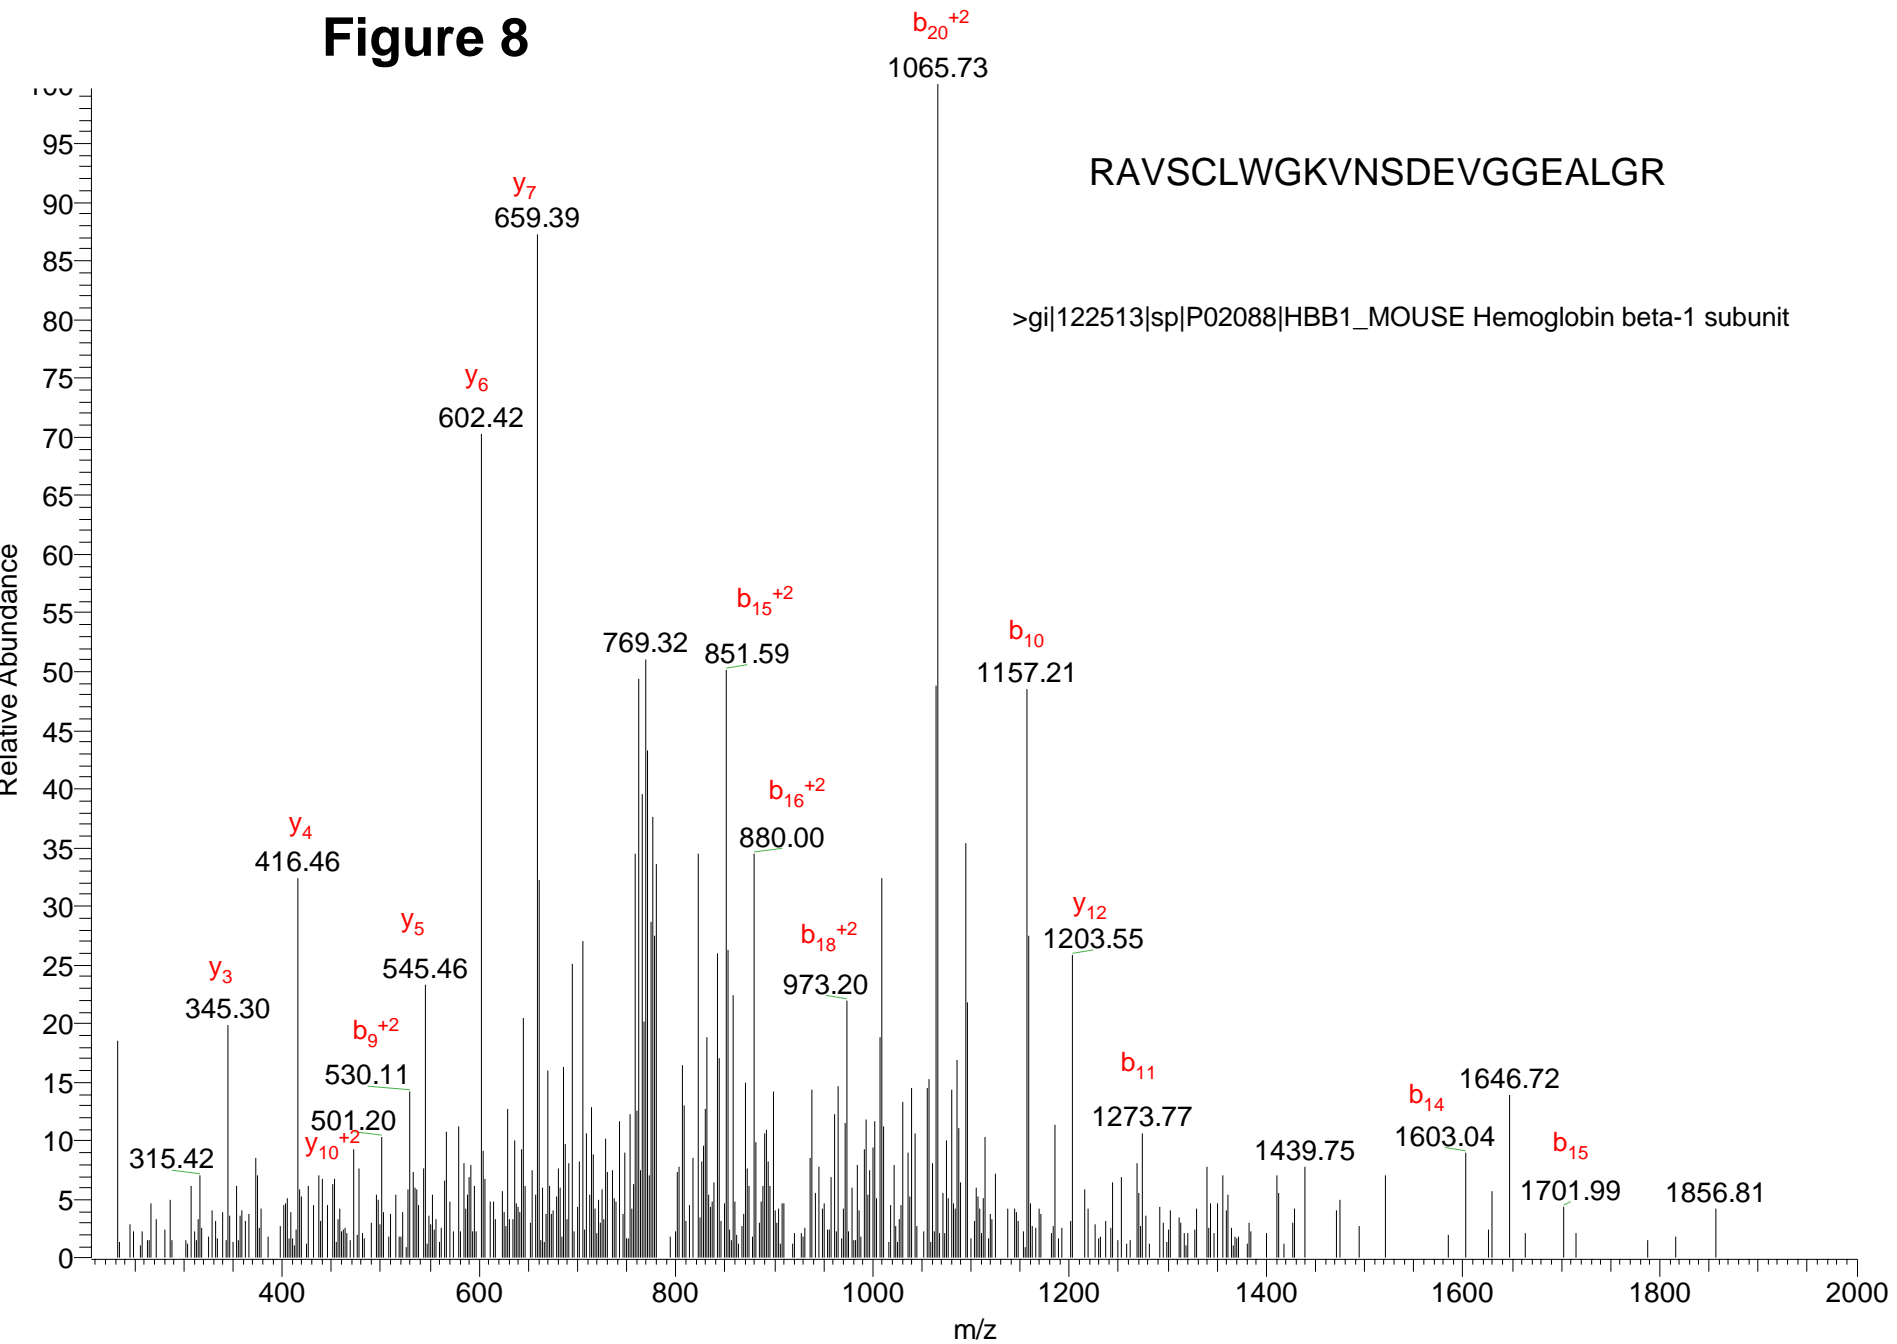

# Figure 9

RGDDGAEYVVESTGVFTTMEK

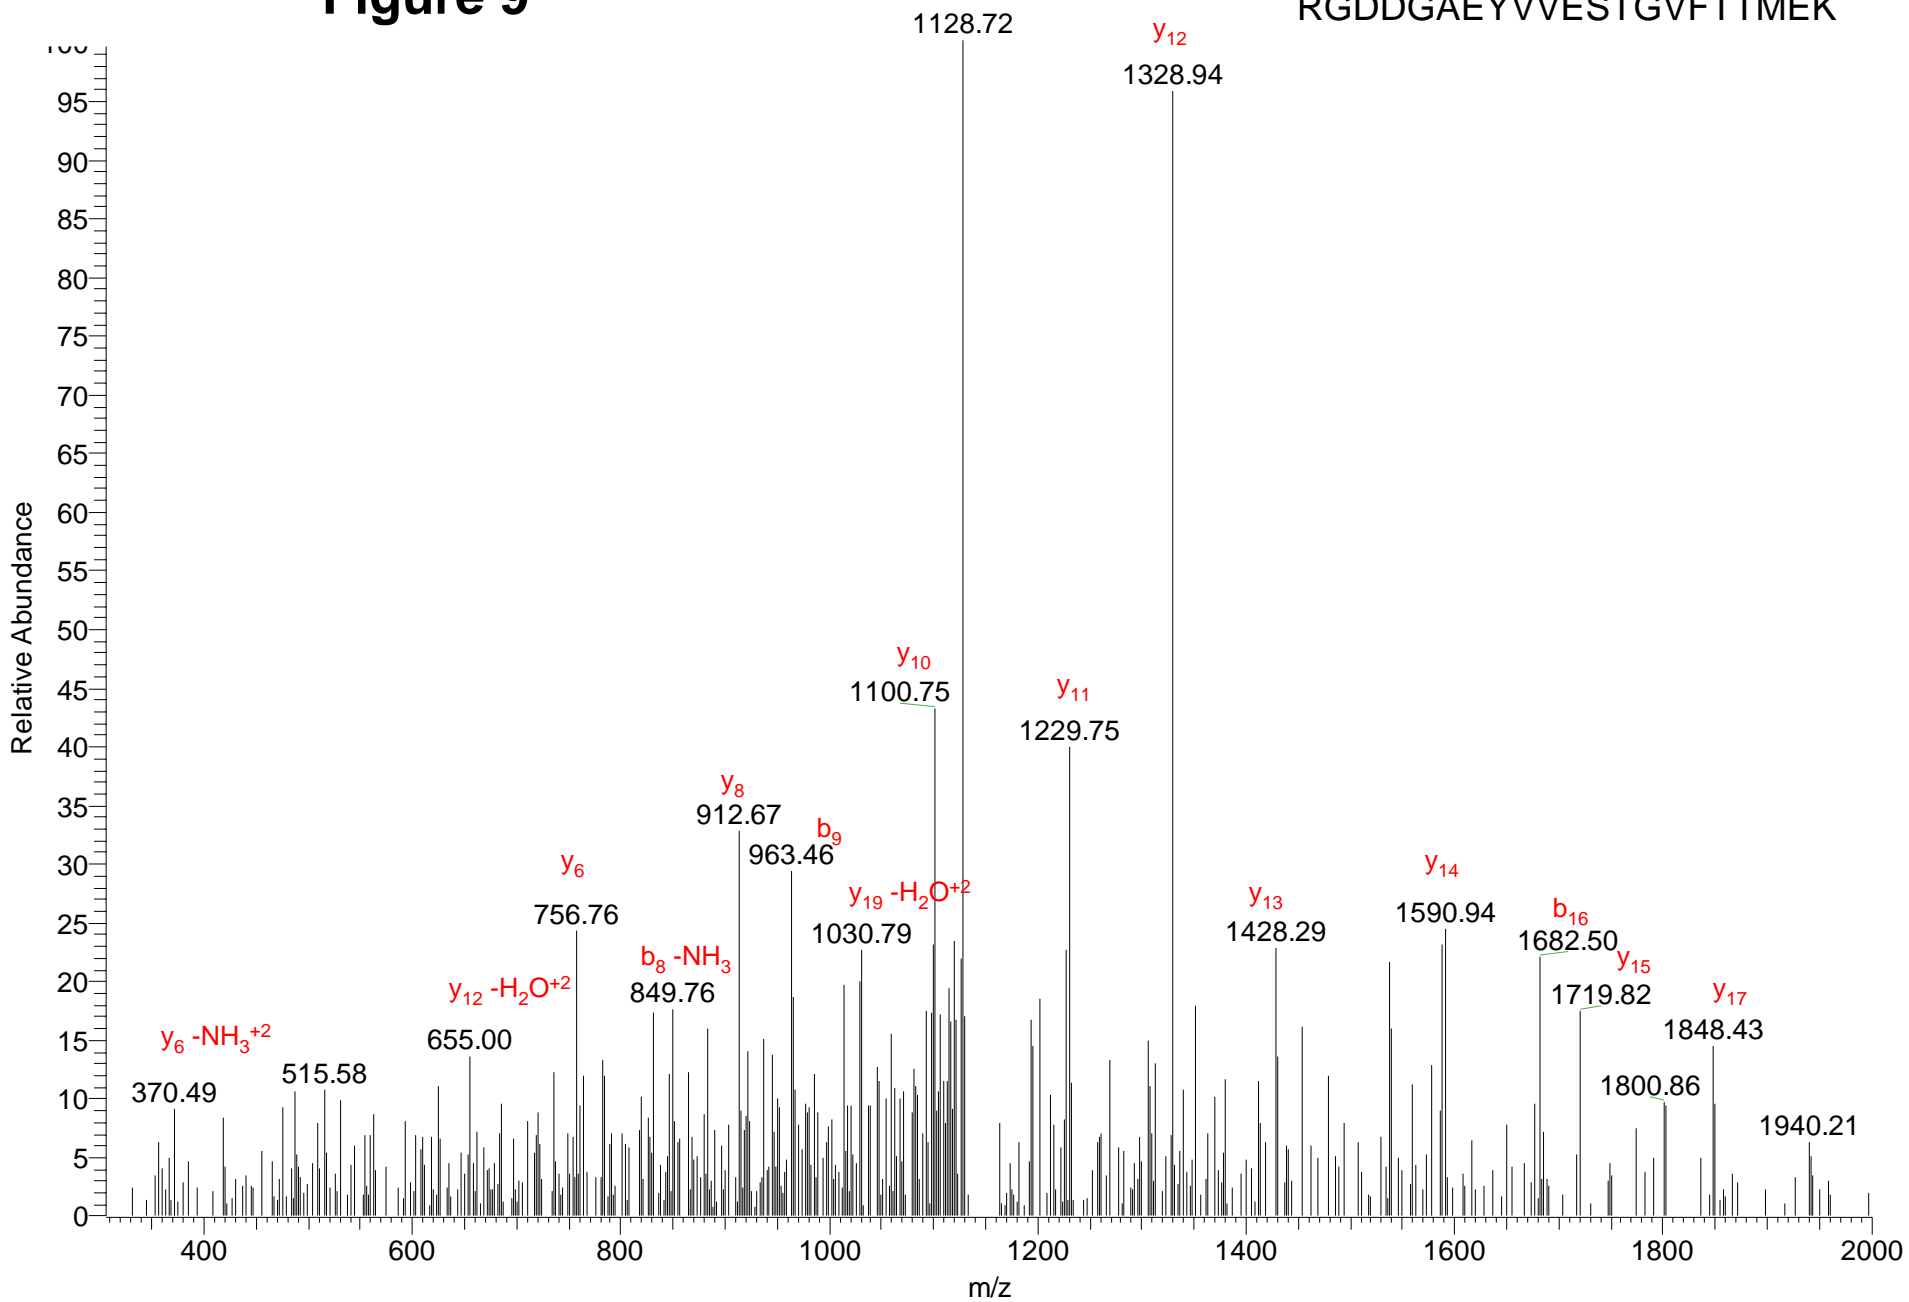

# Figure 10

>gi|6755943|ref|NP\_035808.1| ubiquitin specific protease 4

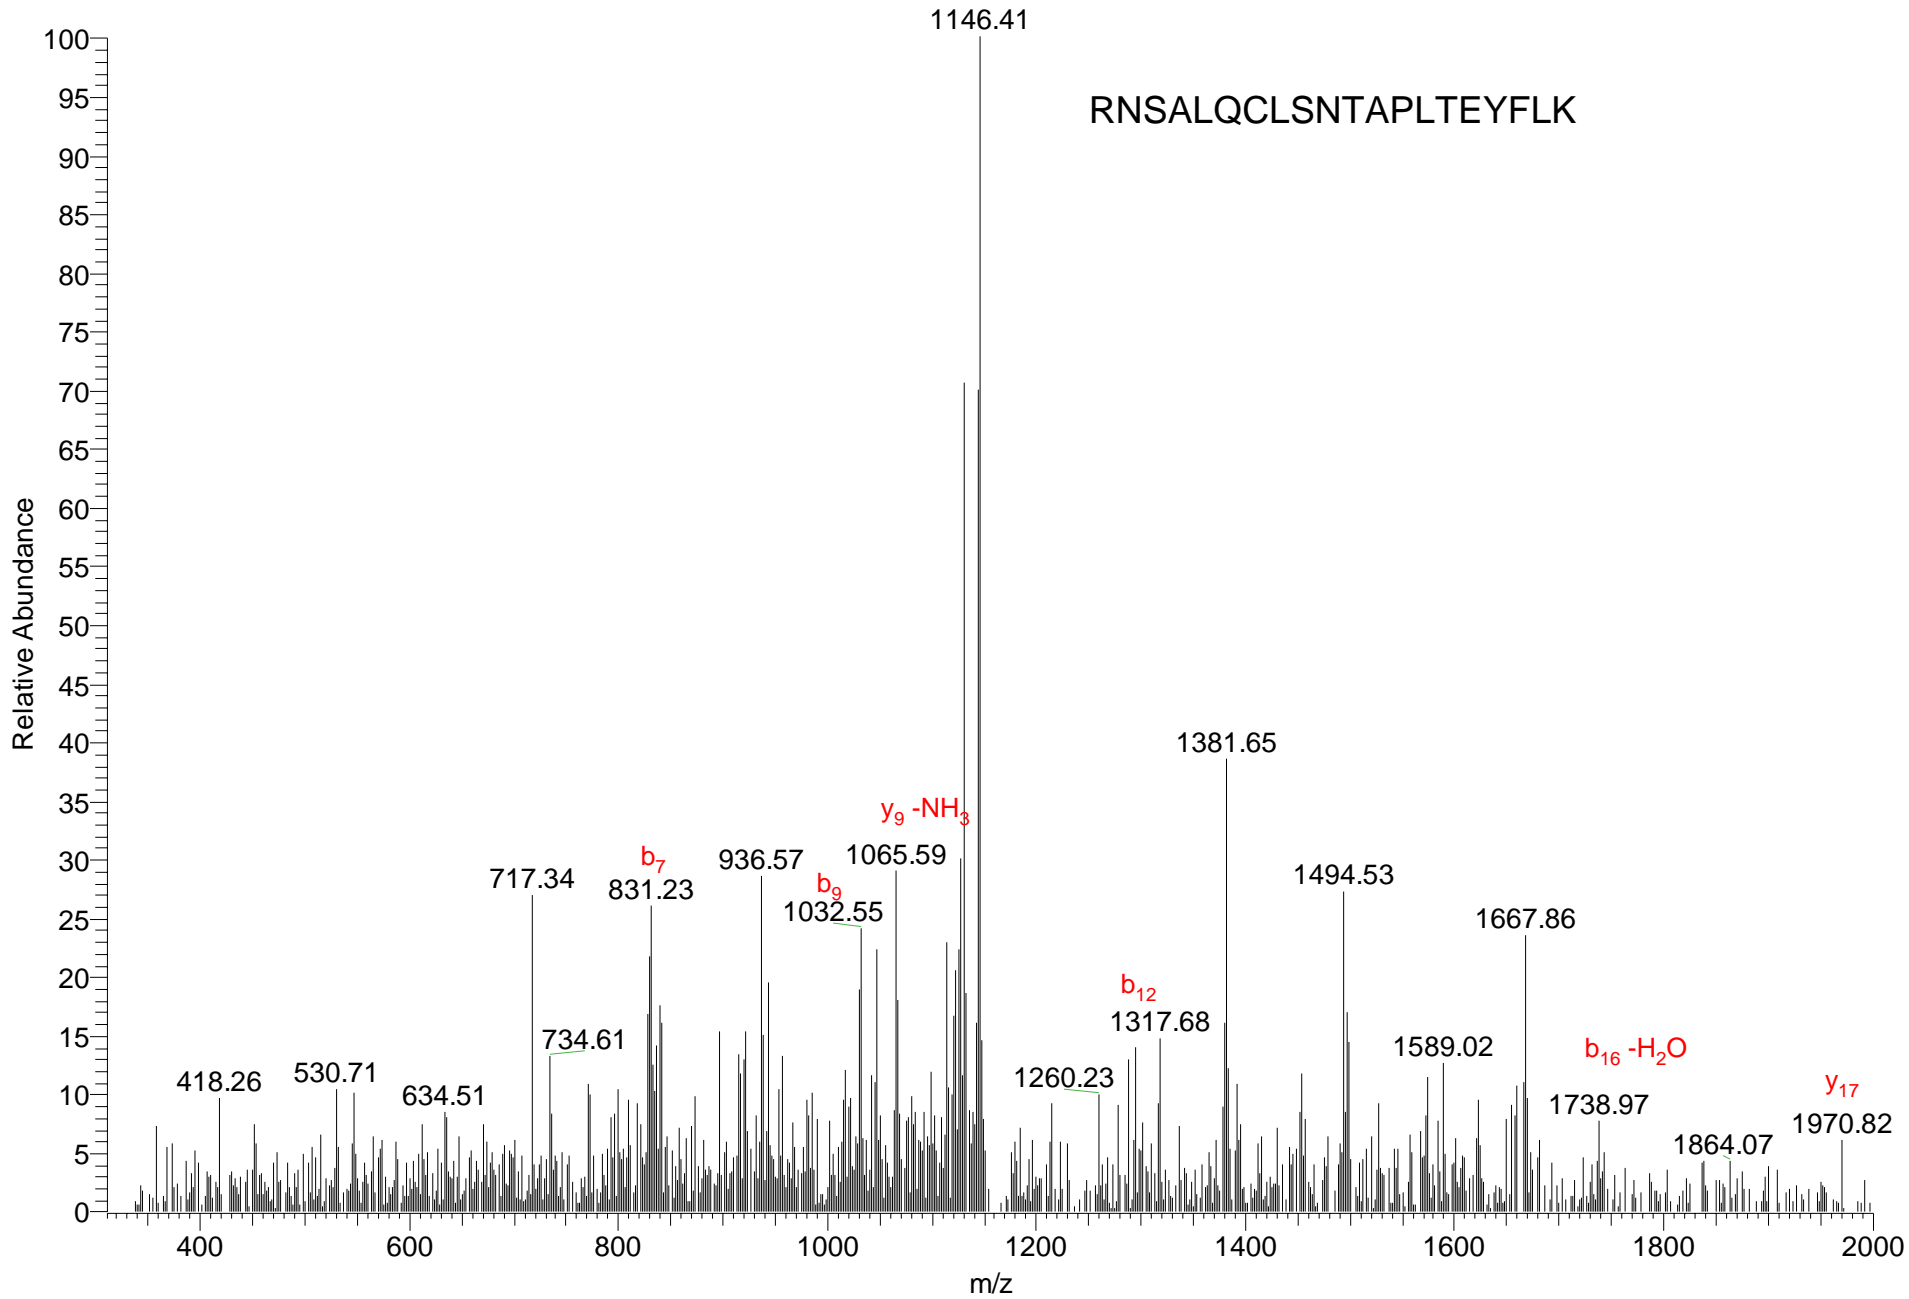

# Figure 11

RAAVAAENEEIGAIHK

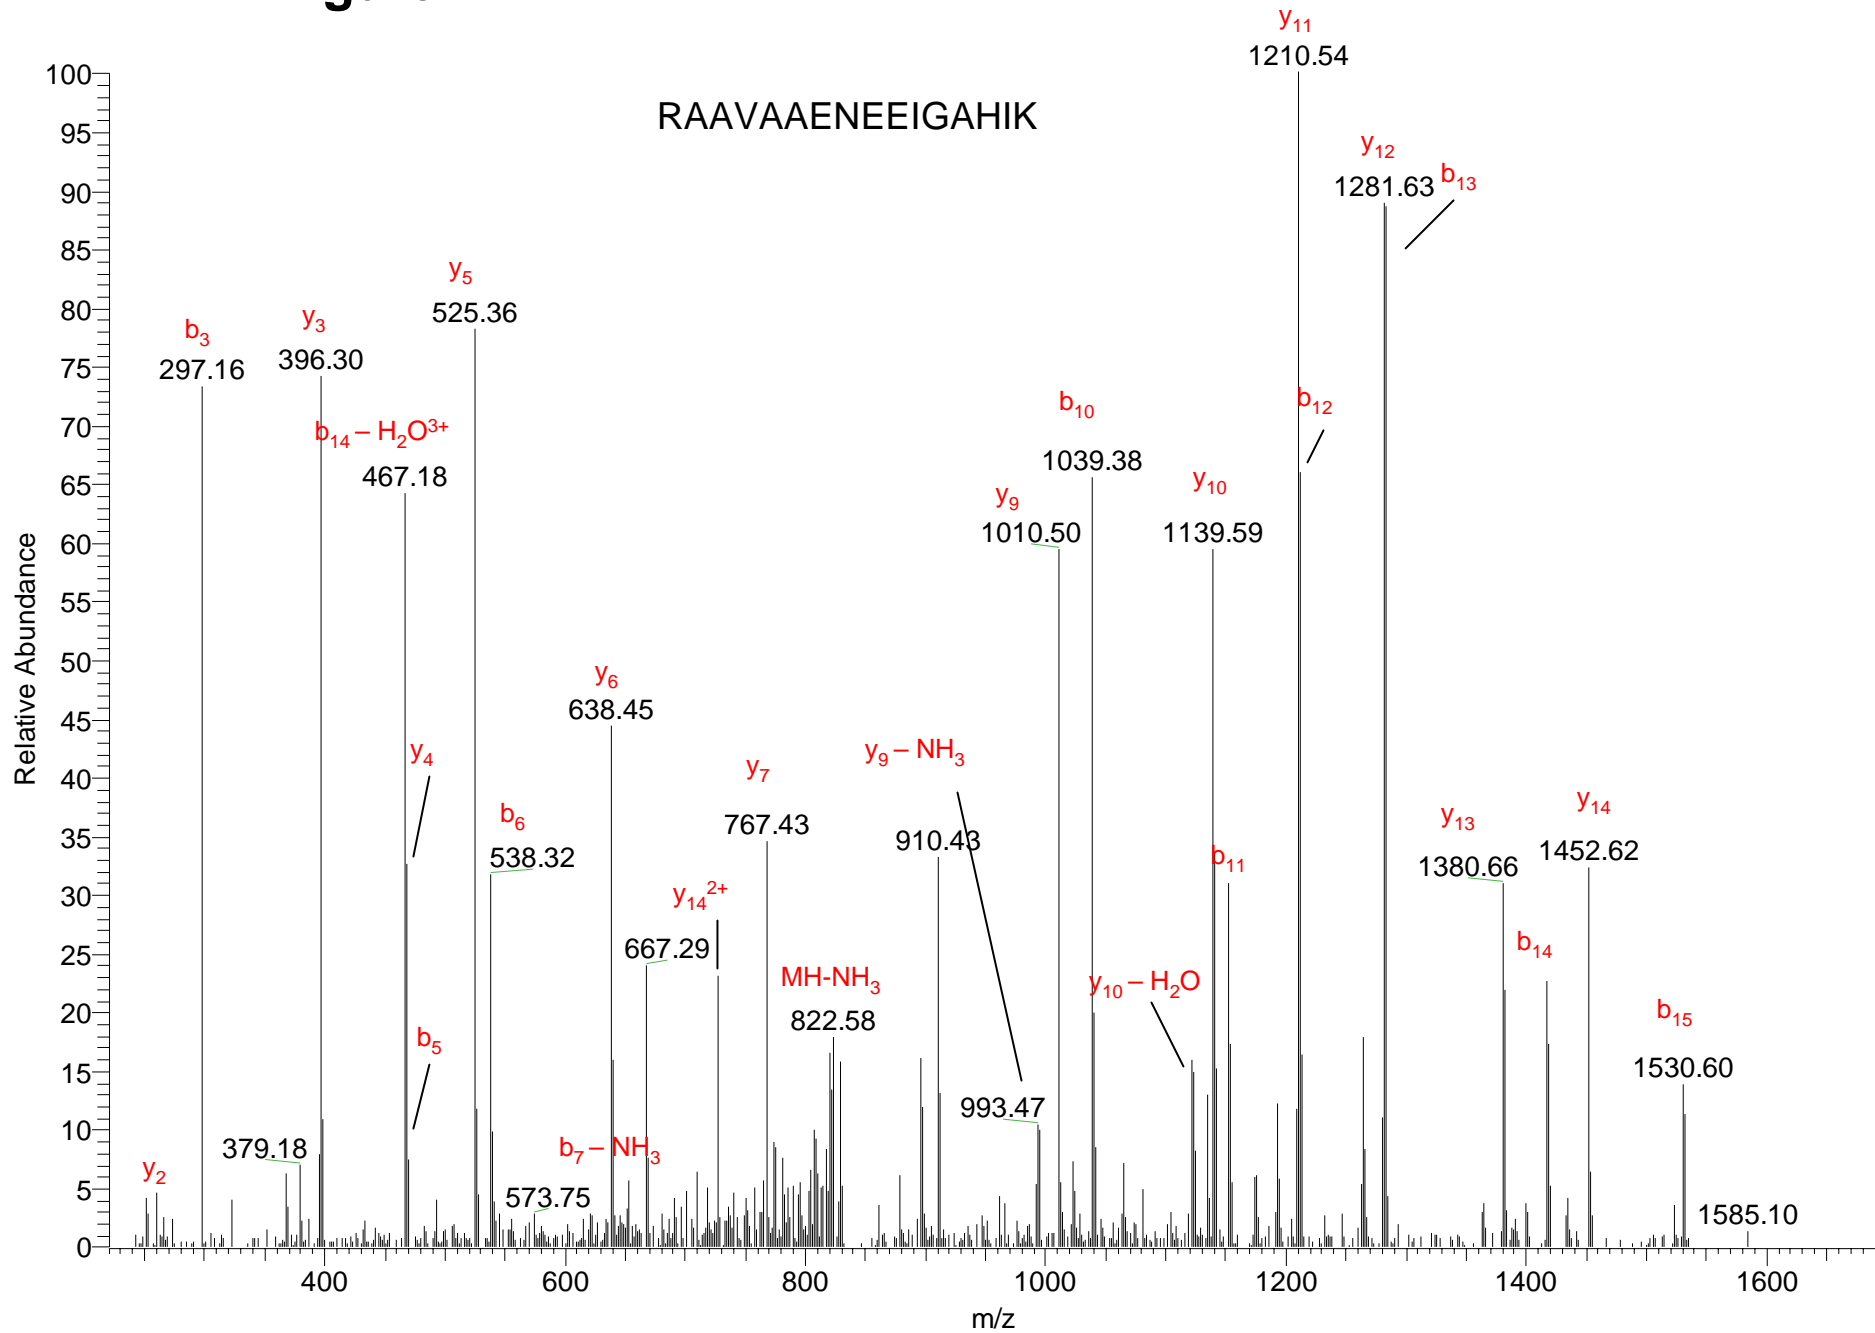

# Figure 12

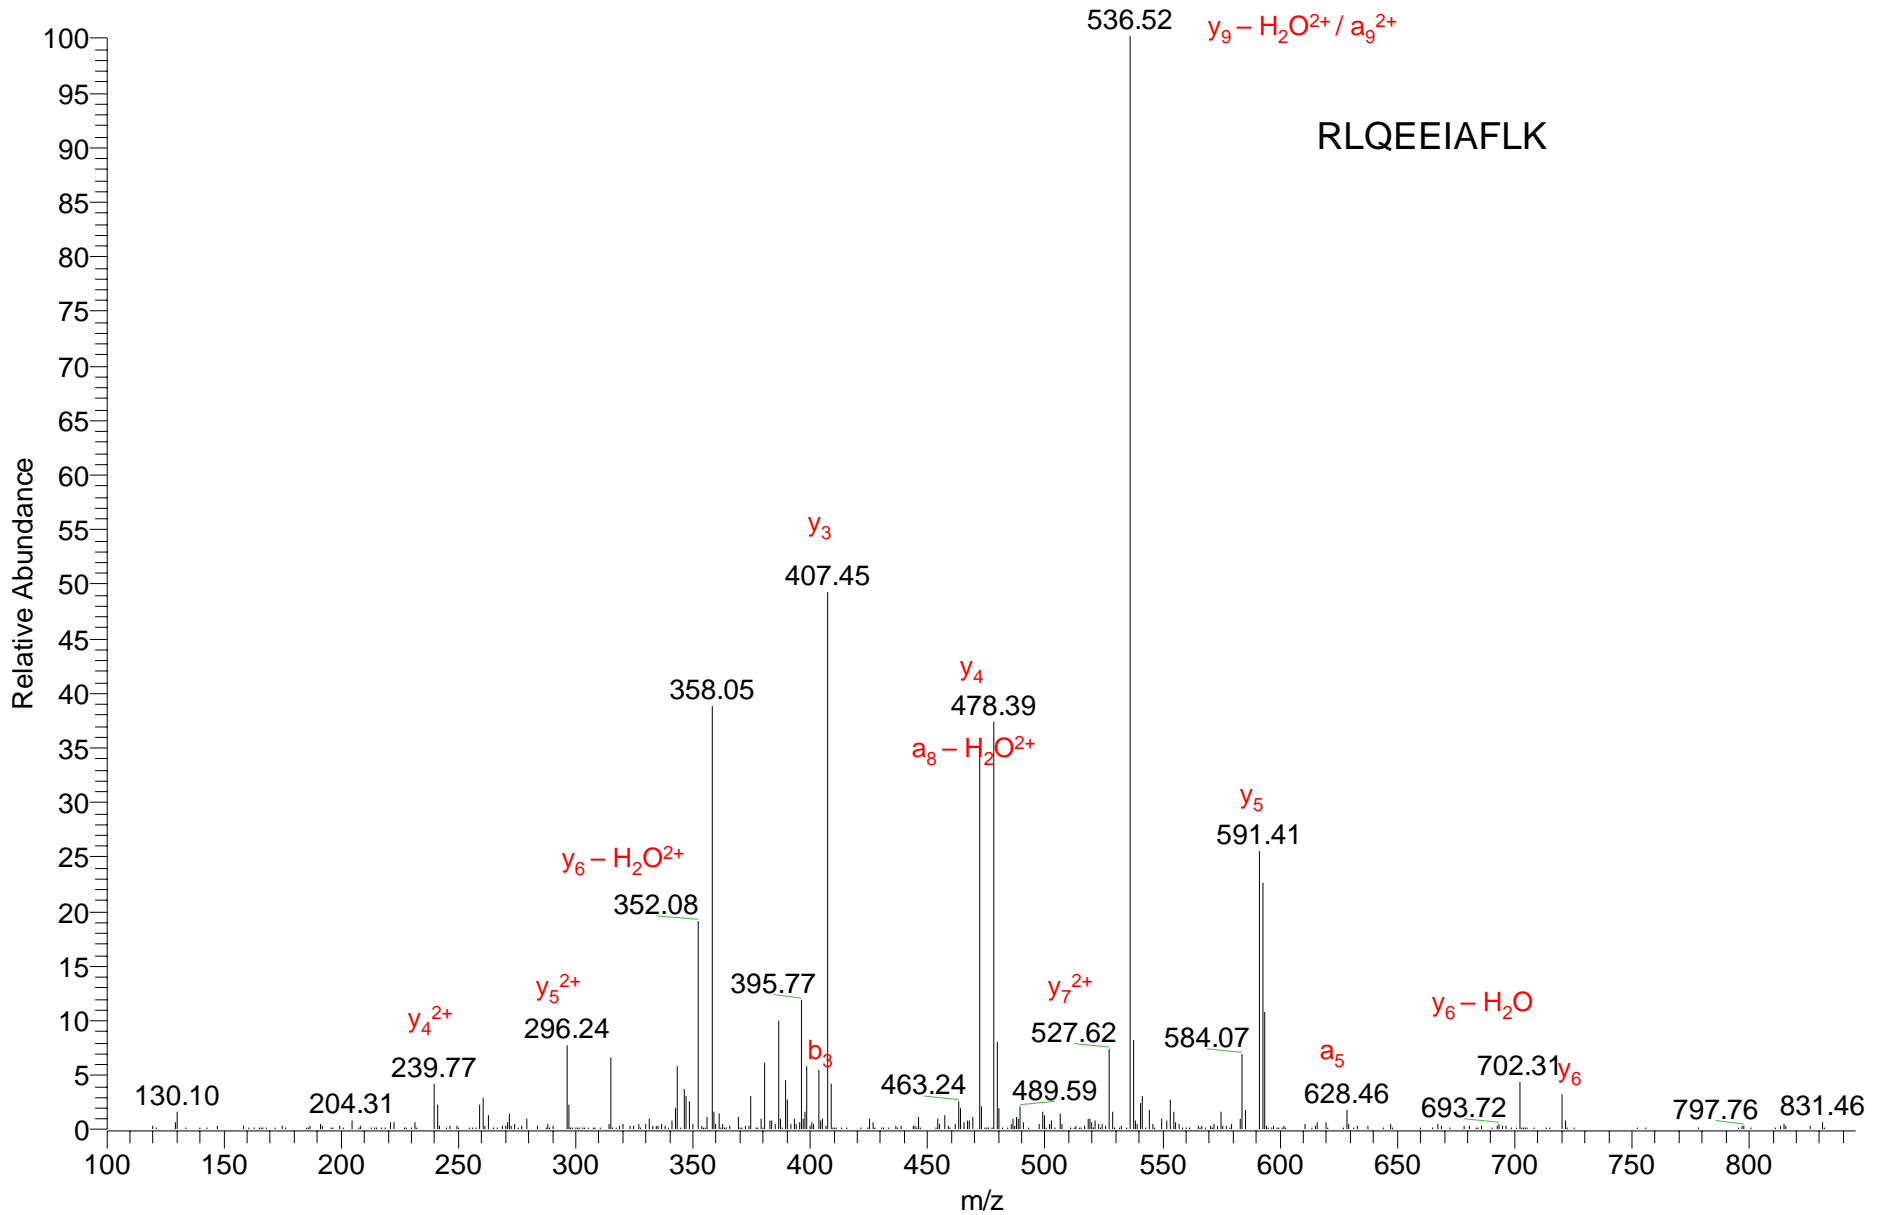

# Figure 13

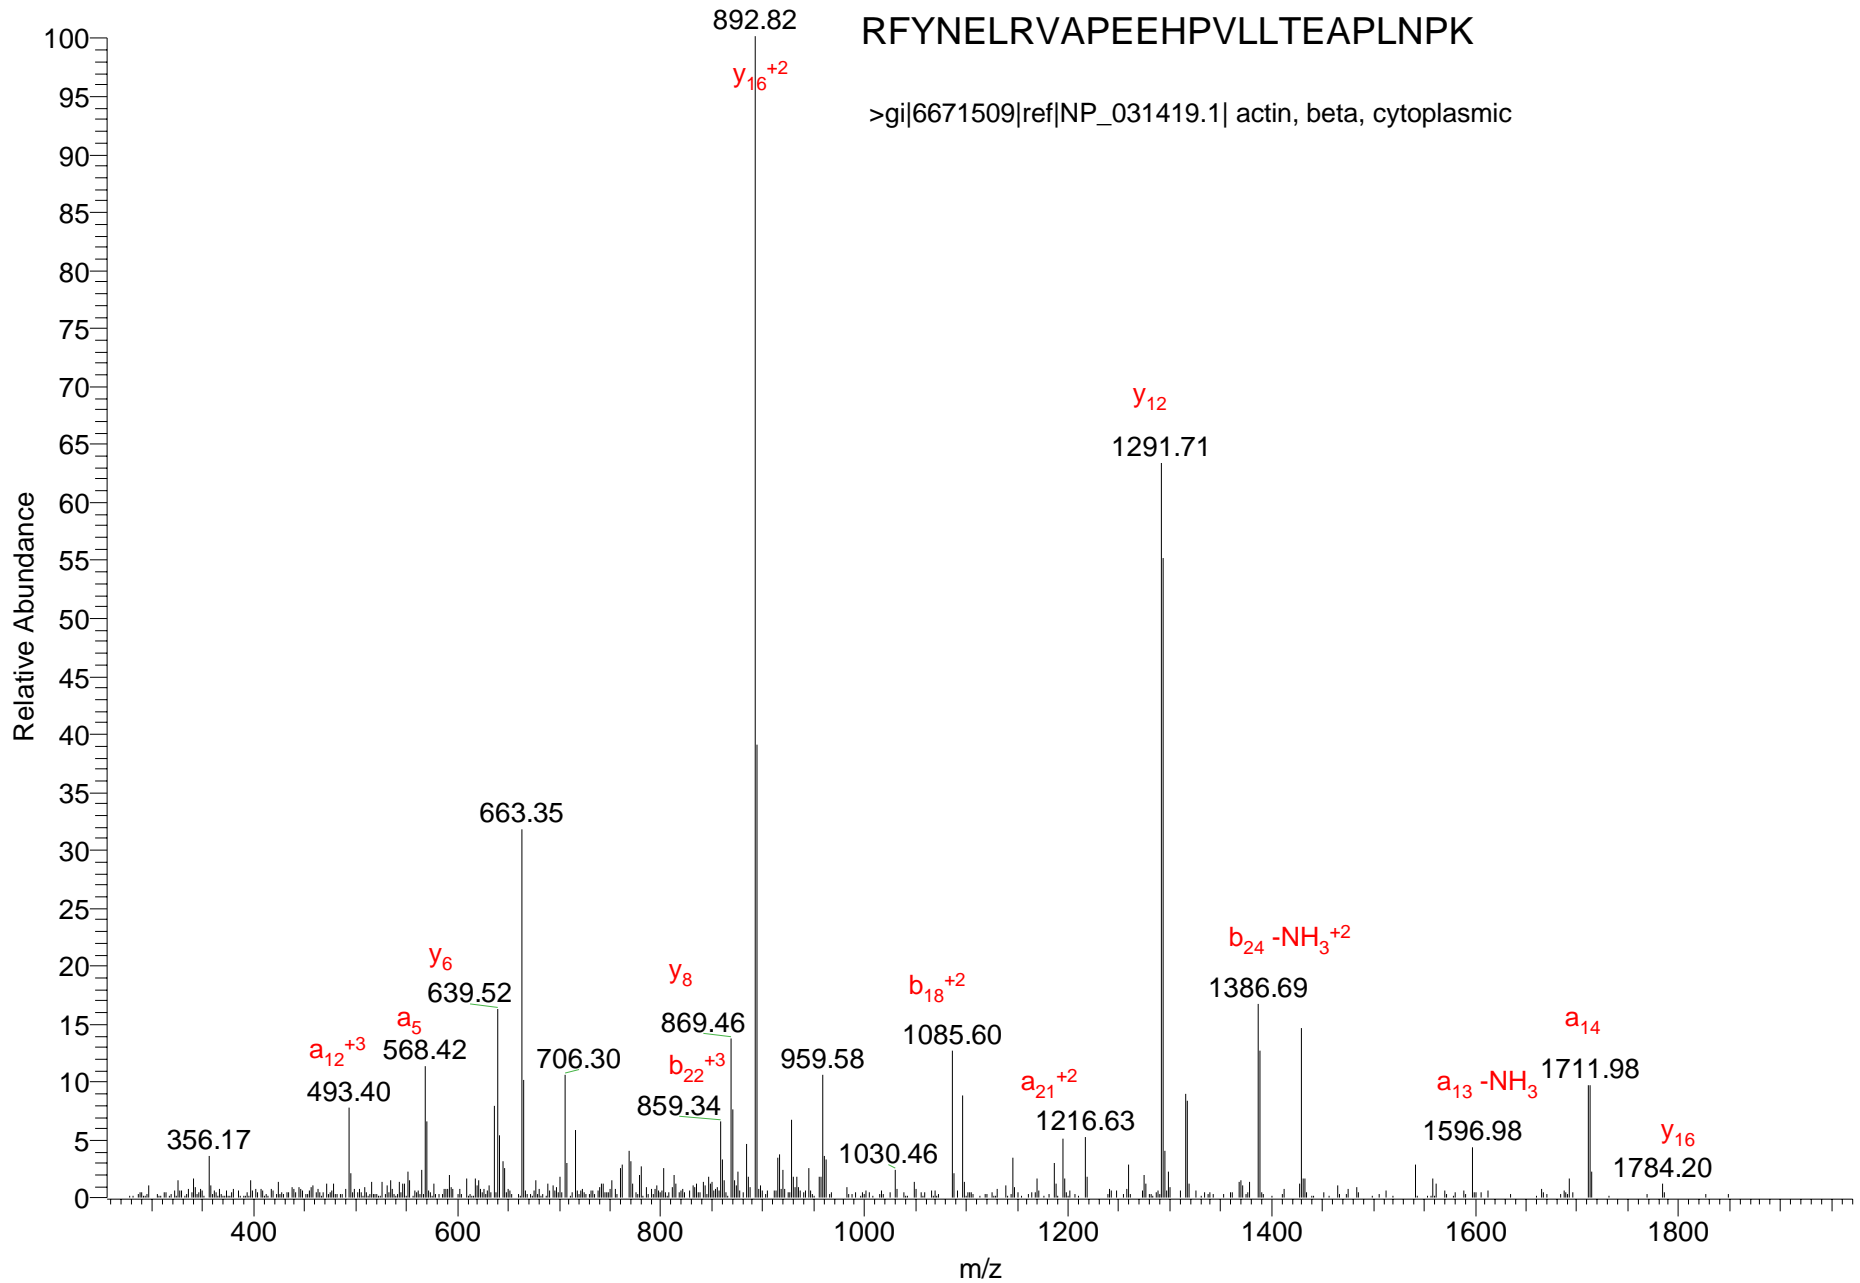

# Figure 14

RNGASAGVAAQHSQCFAAWYGHCPGLK

>gi|18152793|ref|NP\_077183.1| pyruvate dehydrogenase (lipoamide) beta

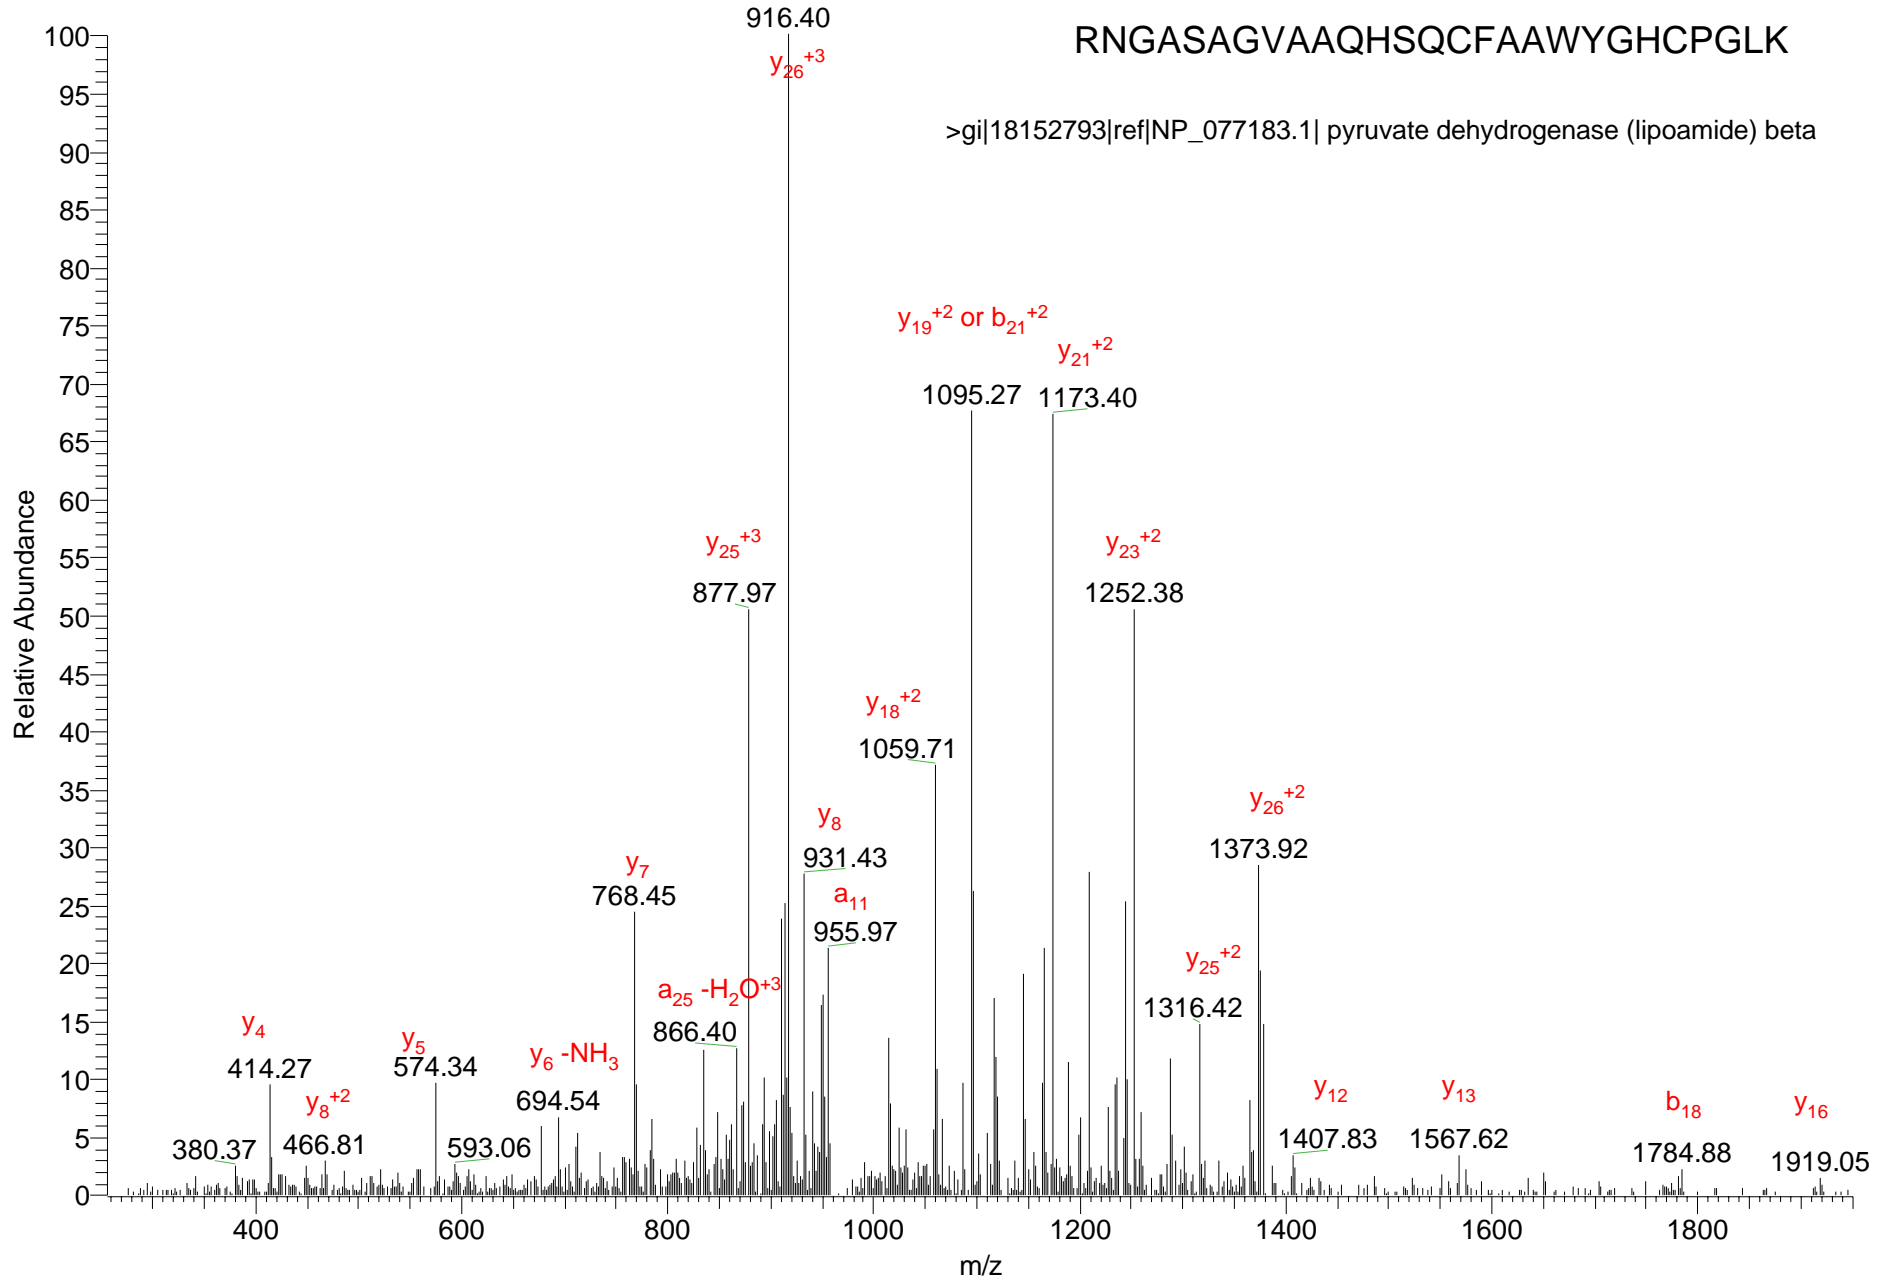

# Figure 15

REHCDCLQGFQLTHSLGGGTGSGMGTTLLISK

>gi|68775966|sp|Q922F4|TBB6\_MOUSE Tubulin beta-6 chain

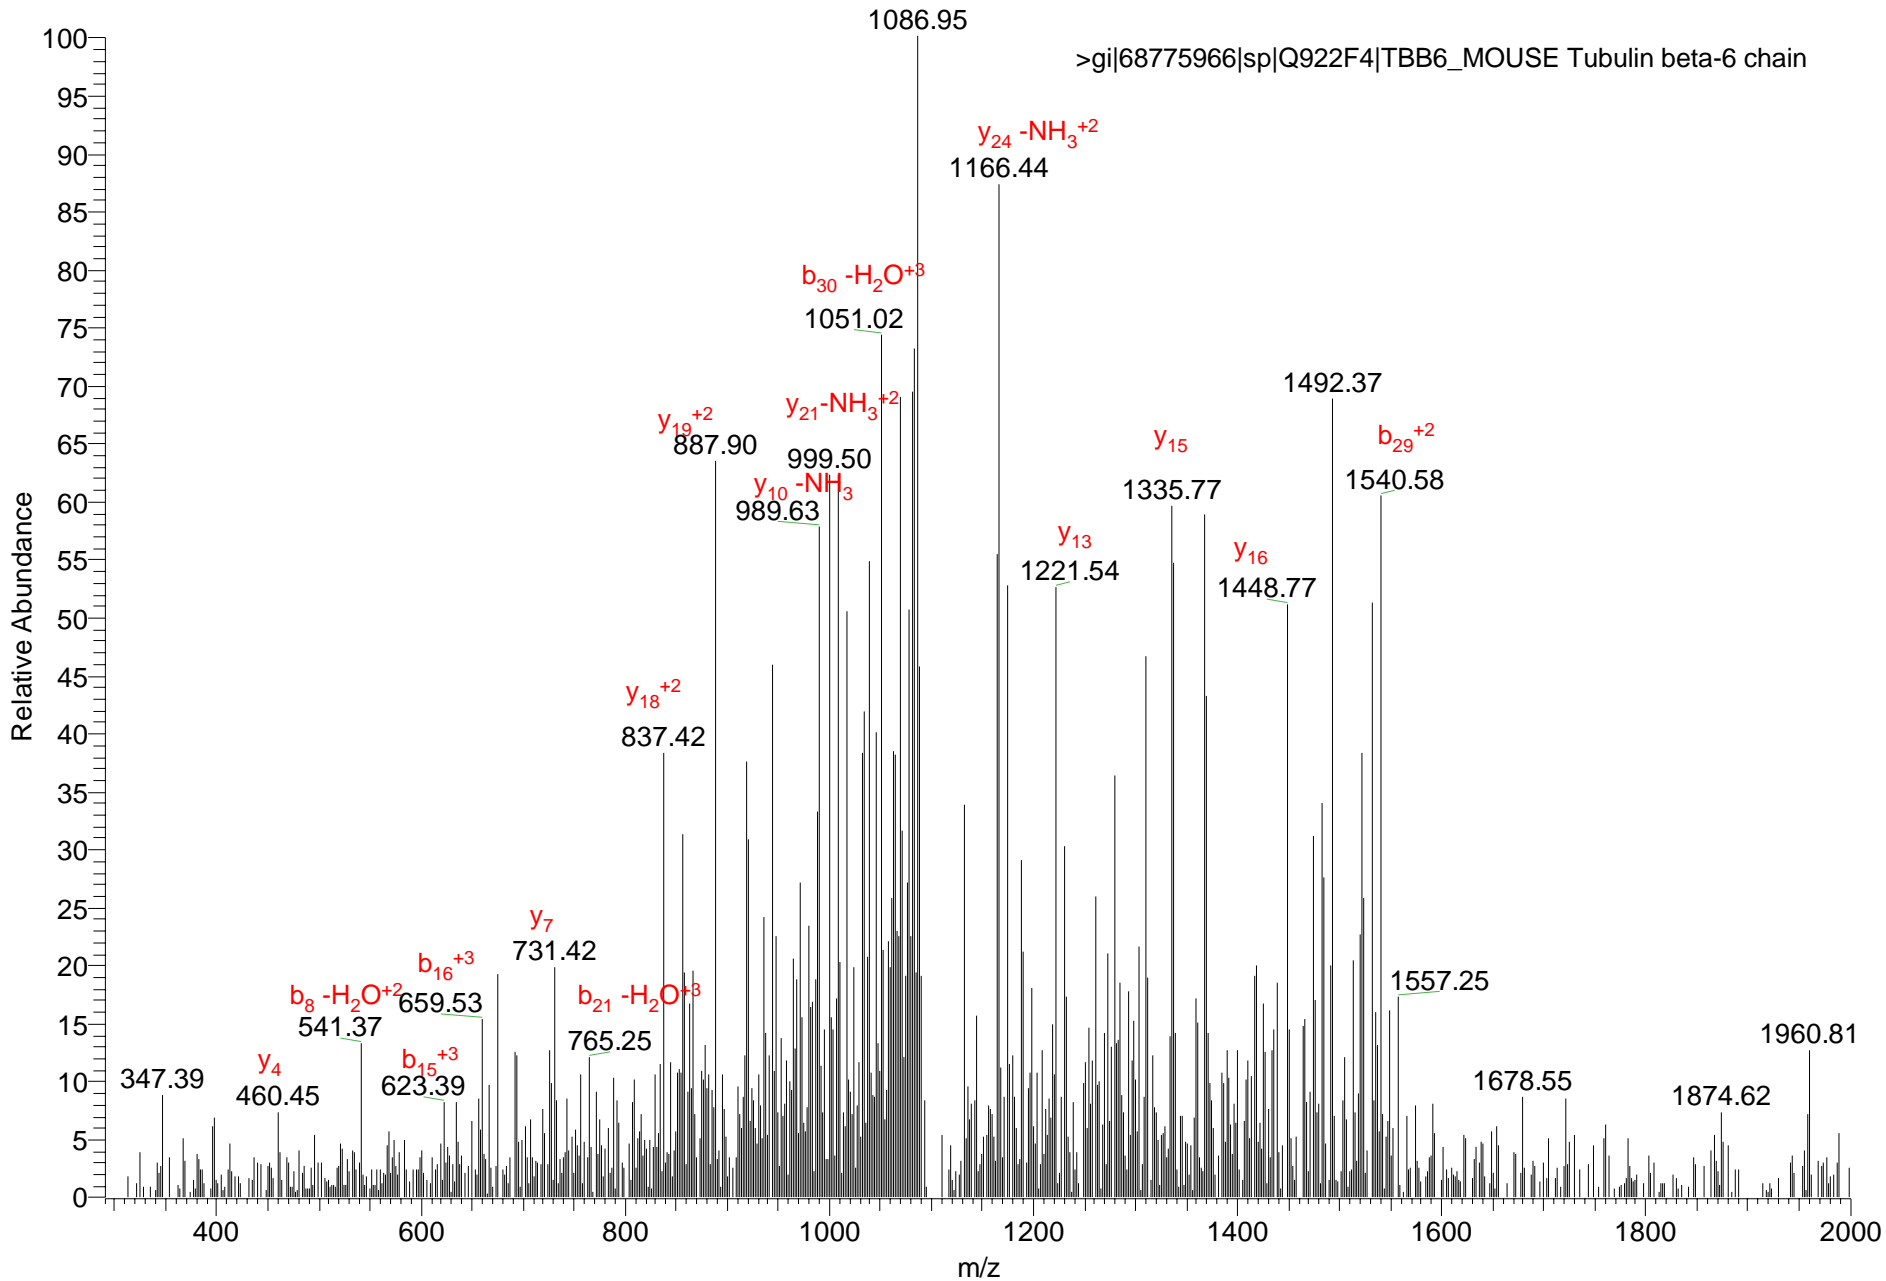



# Figure 16

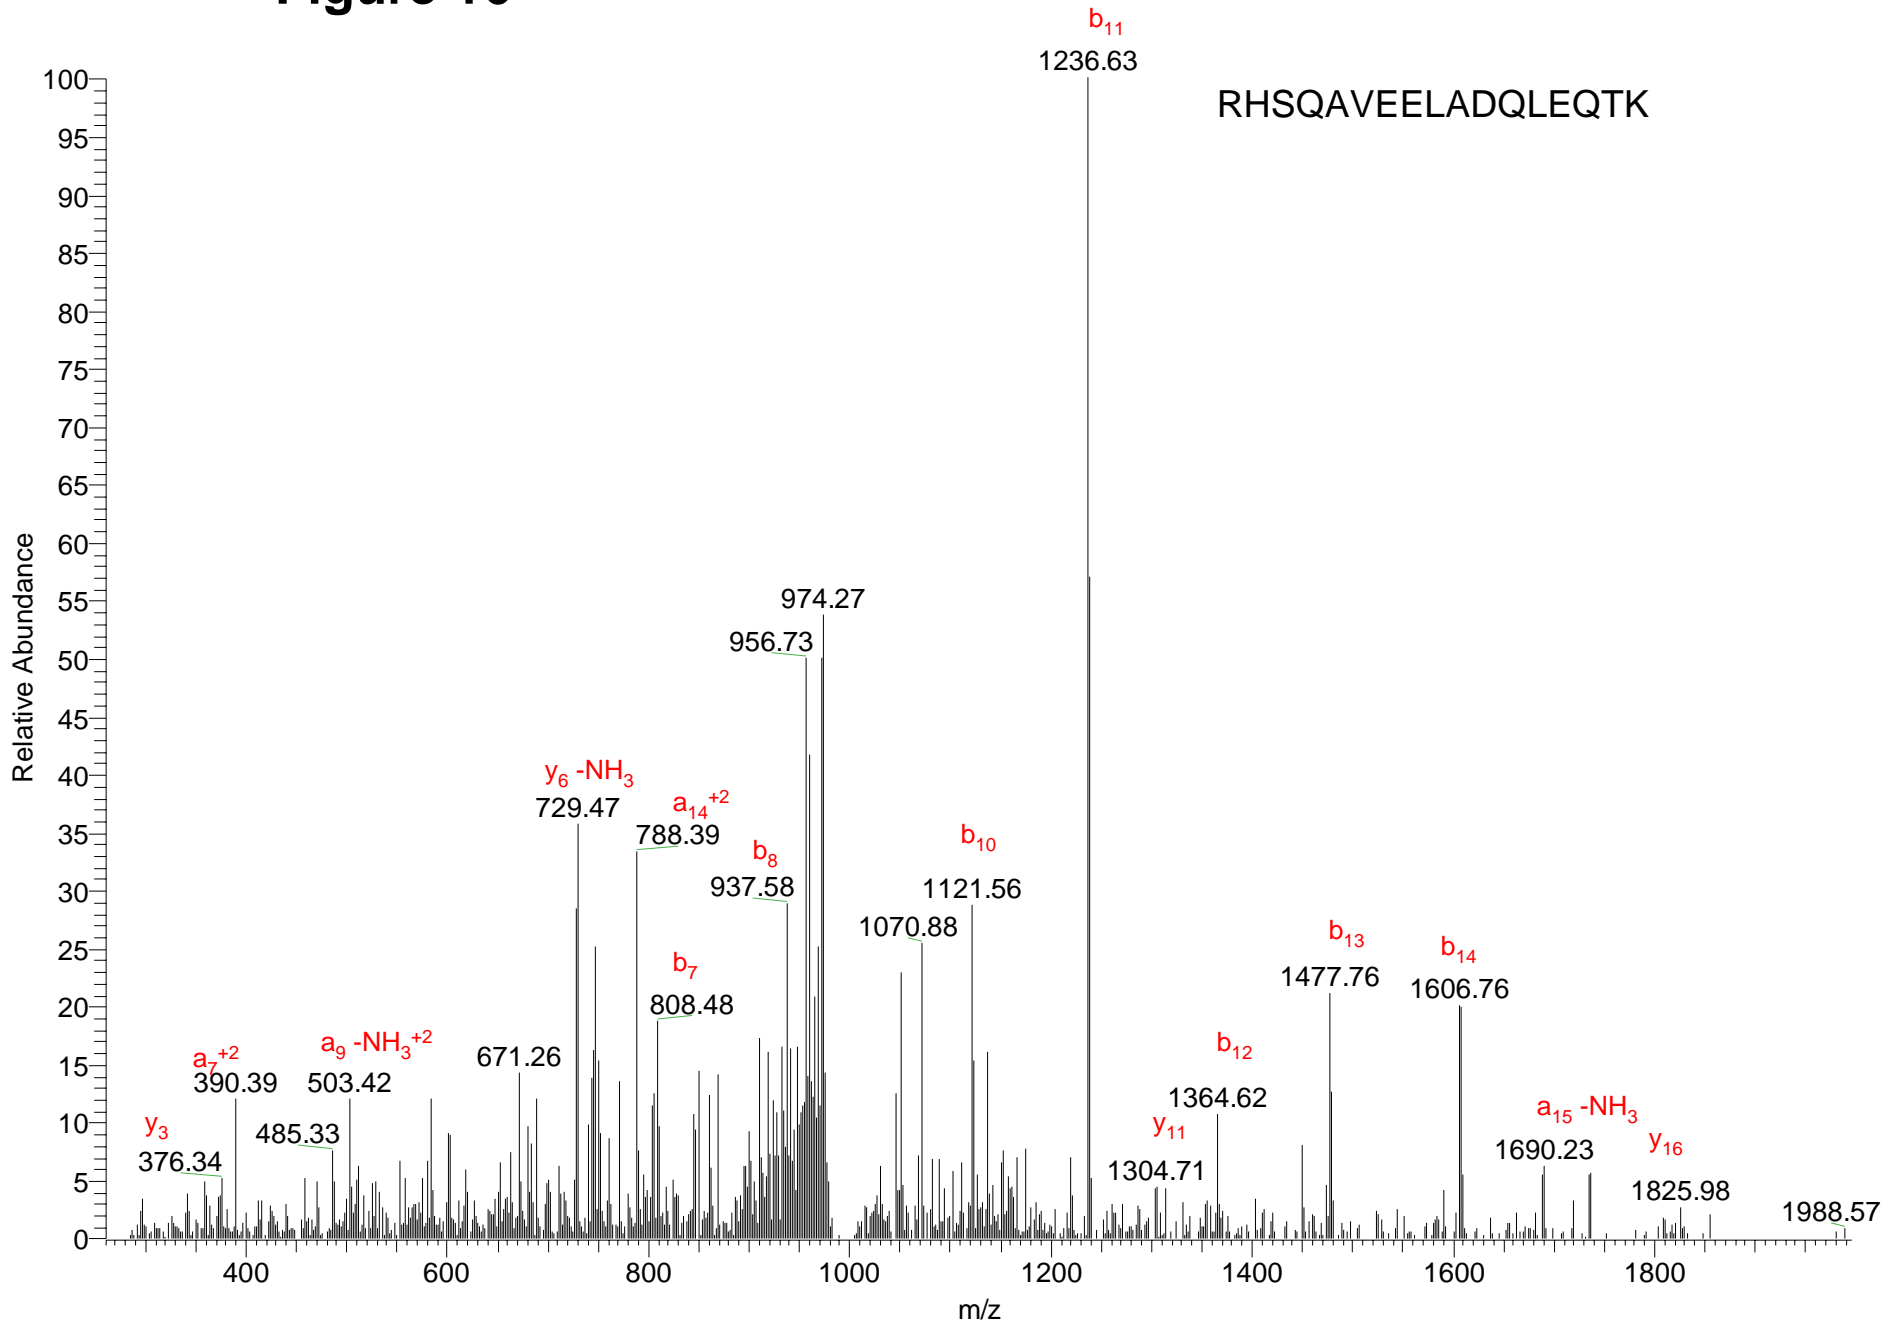

# Figure 17

RTDQASMPDNTAAQK

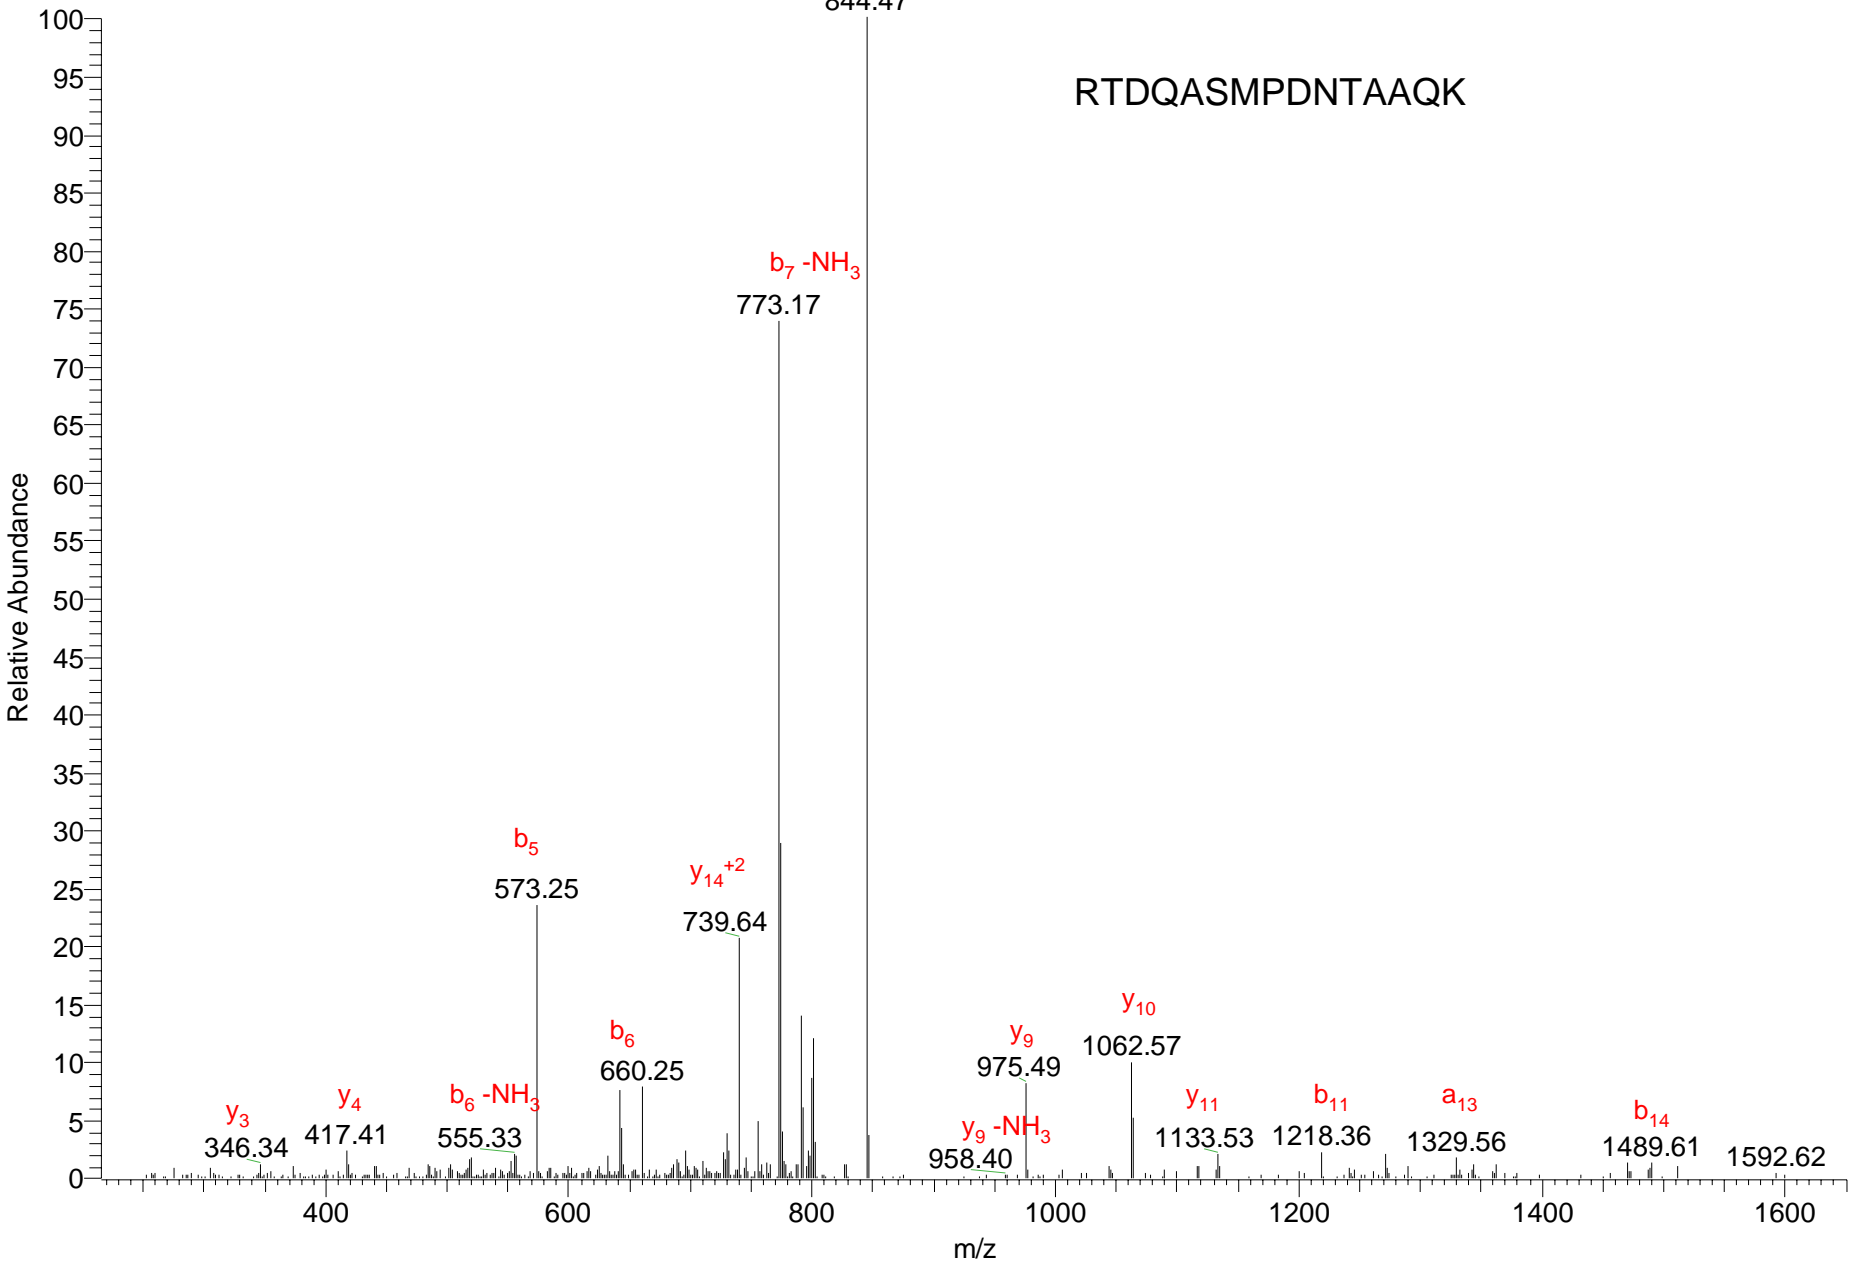

# Figure 18

>gi|52345394|ref|NP\_001004365.1| ARP3 actin-related protein 3 homolog B

RGSLPPCVVDCGTGYTK

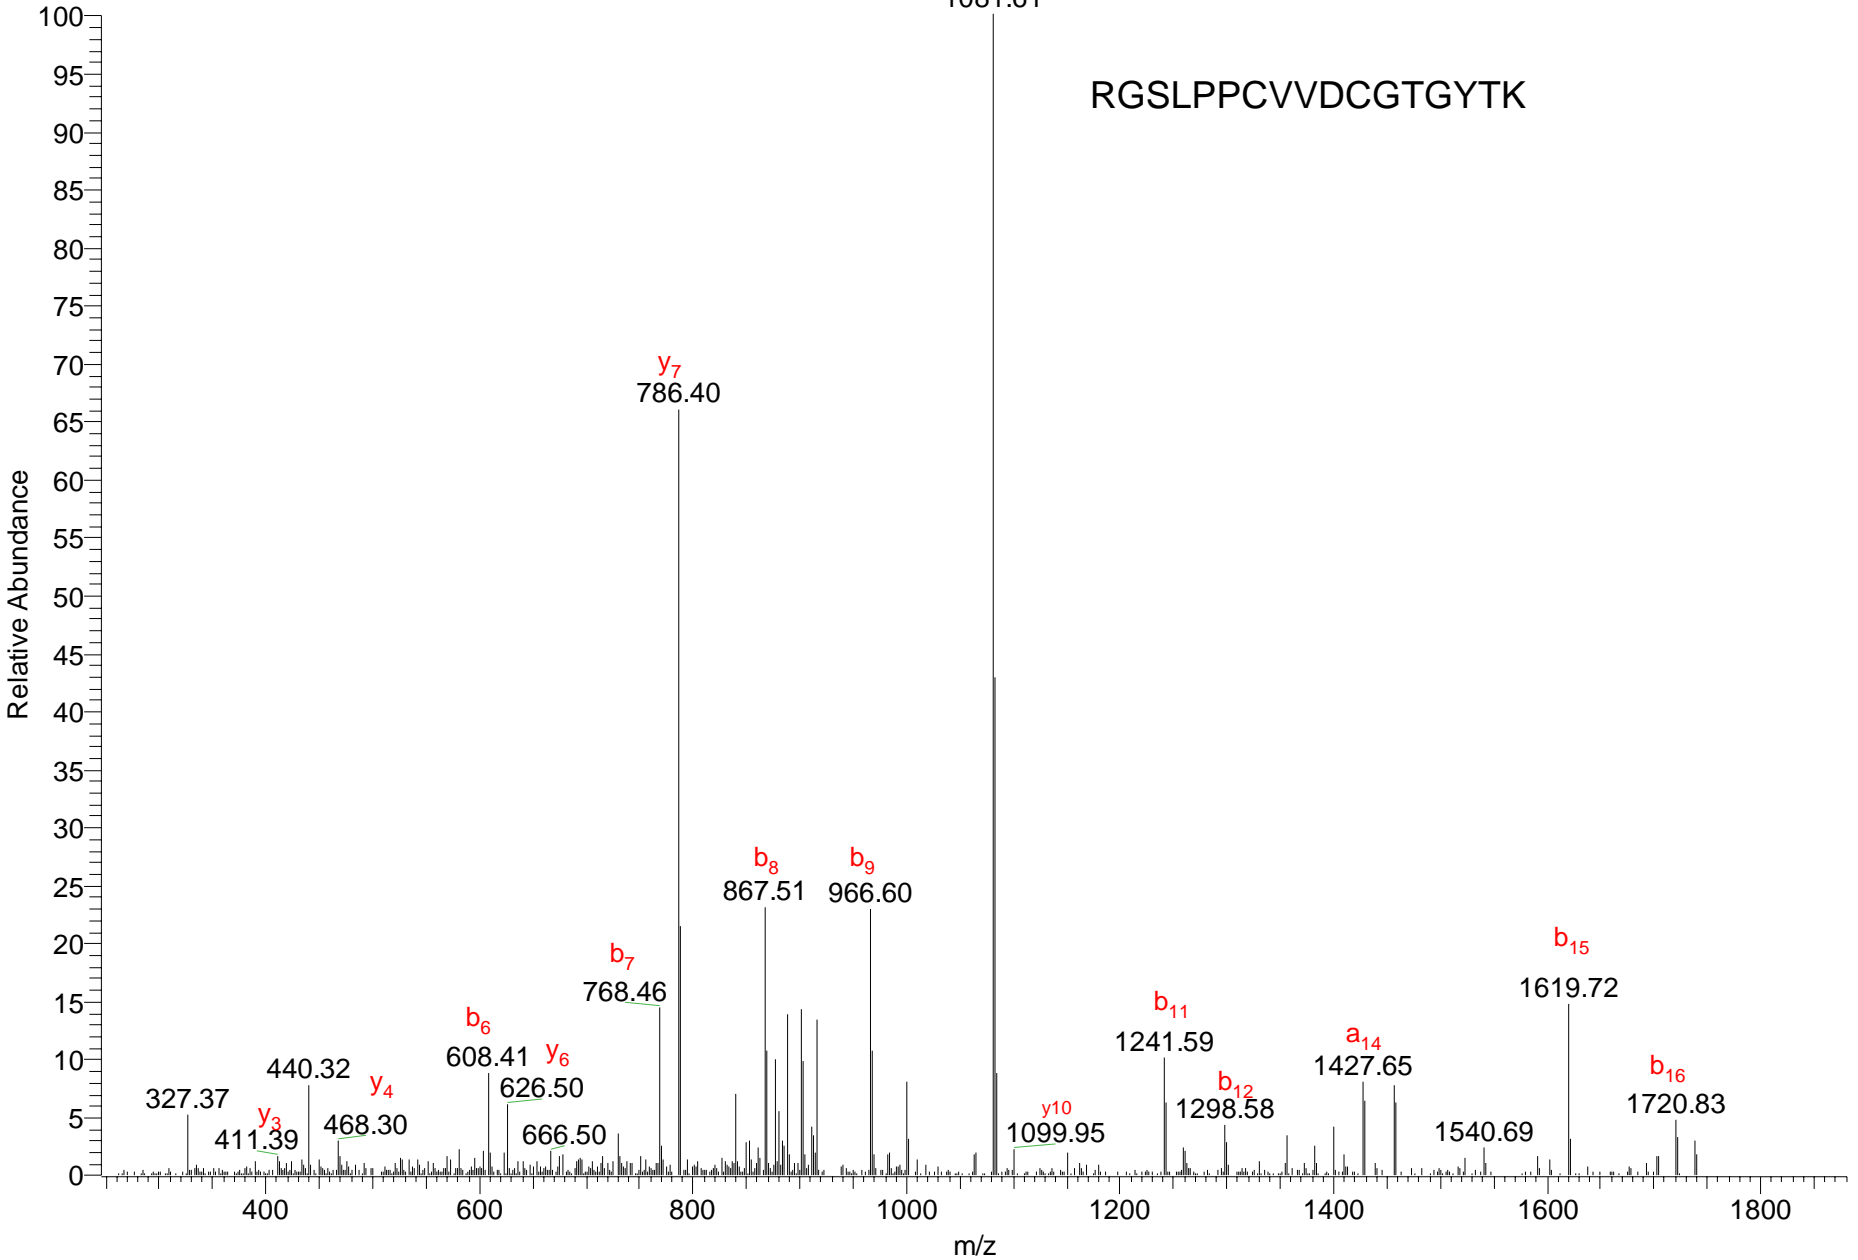

# Figure 19

RMCDRKAVIKNADMSEEMQQDSVECATQALEK

>gi|31981035|ref|NP\_062656.2| dynein, cytoplasmic, light peptide

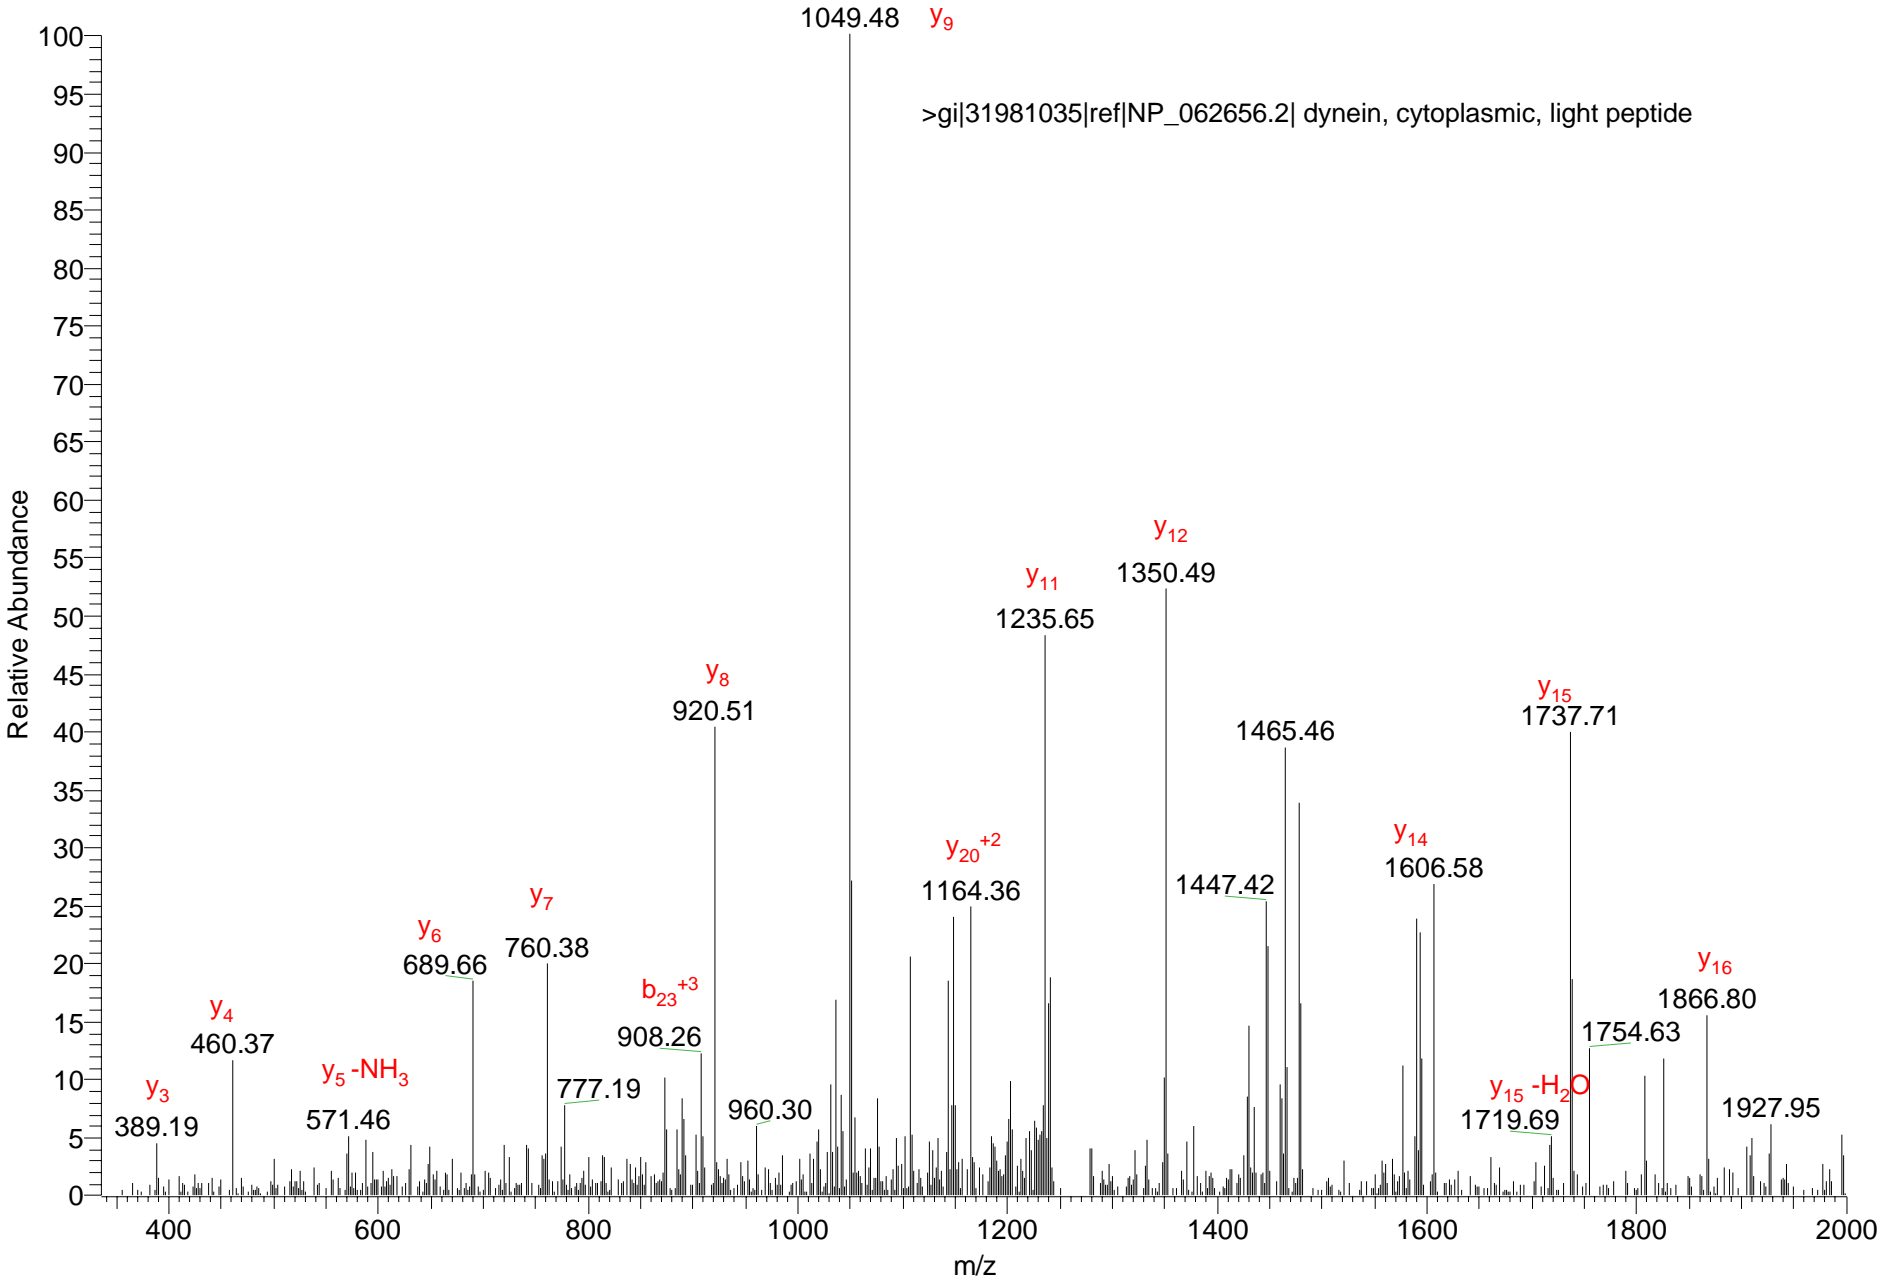

# Figure 20

RMHSGPVMVWEGLNVVK

>gi|37700232|ref|NP\_032730.1| nucleoside-diphosphate kinase 1

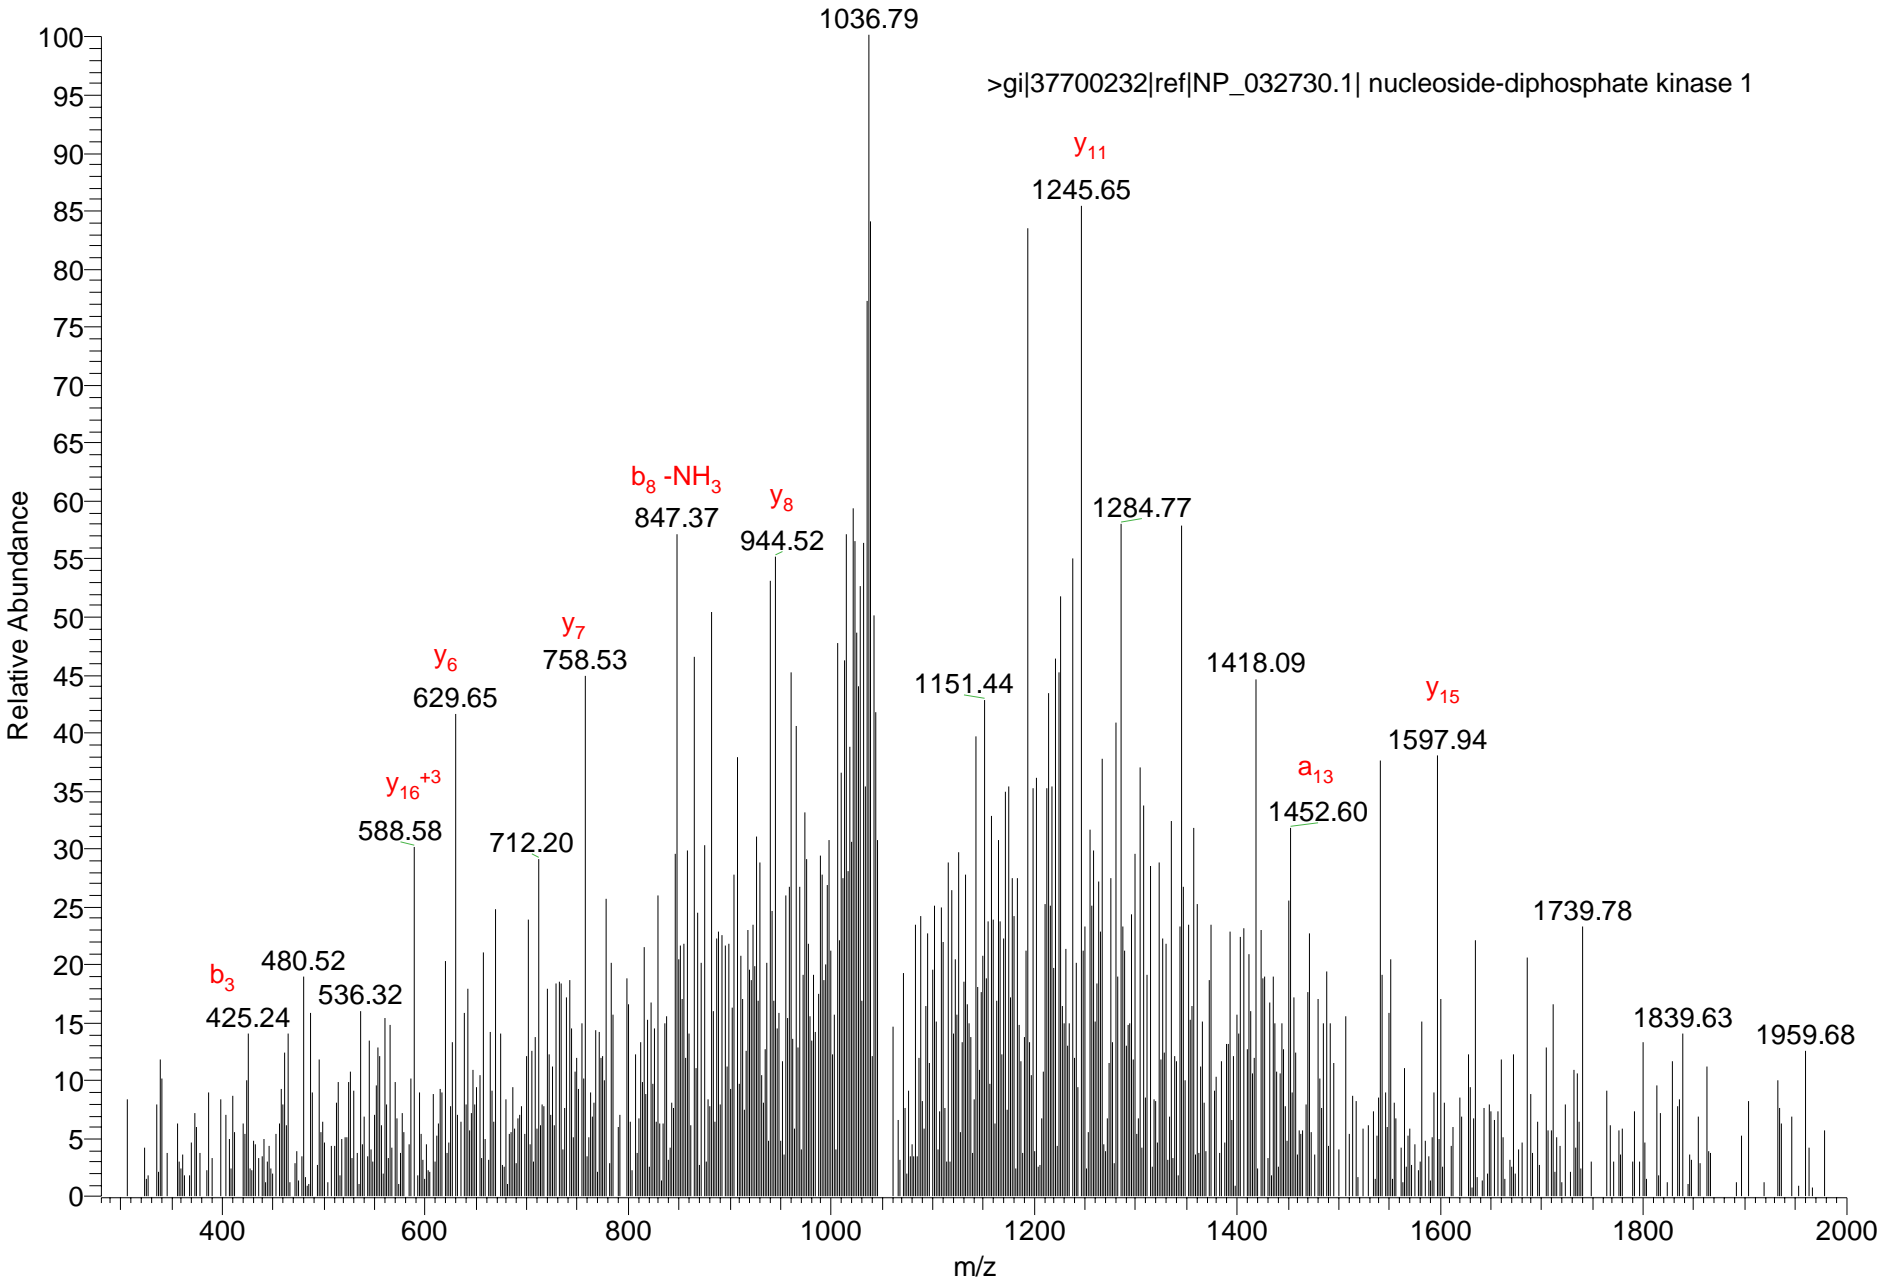

# Figure 21

RKAKVTGQRLVSPGSANETSSILVESVTR

>gi|94397798|ref|XP\_982436.1| PREDICTED: similar to Filamin-B

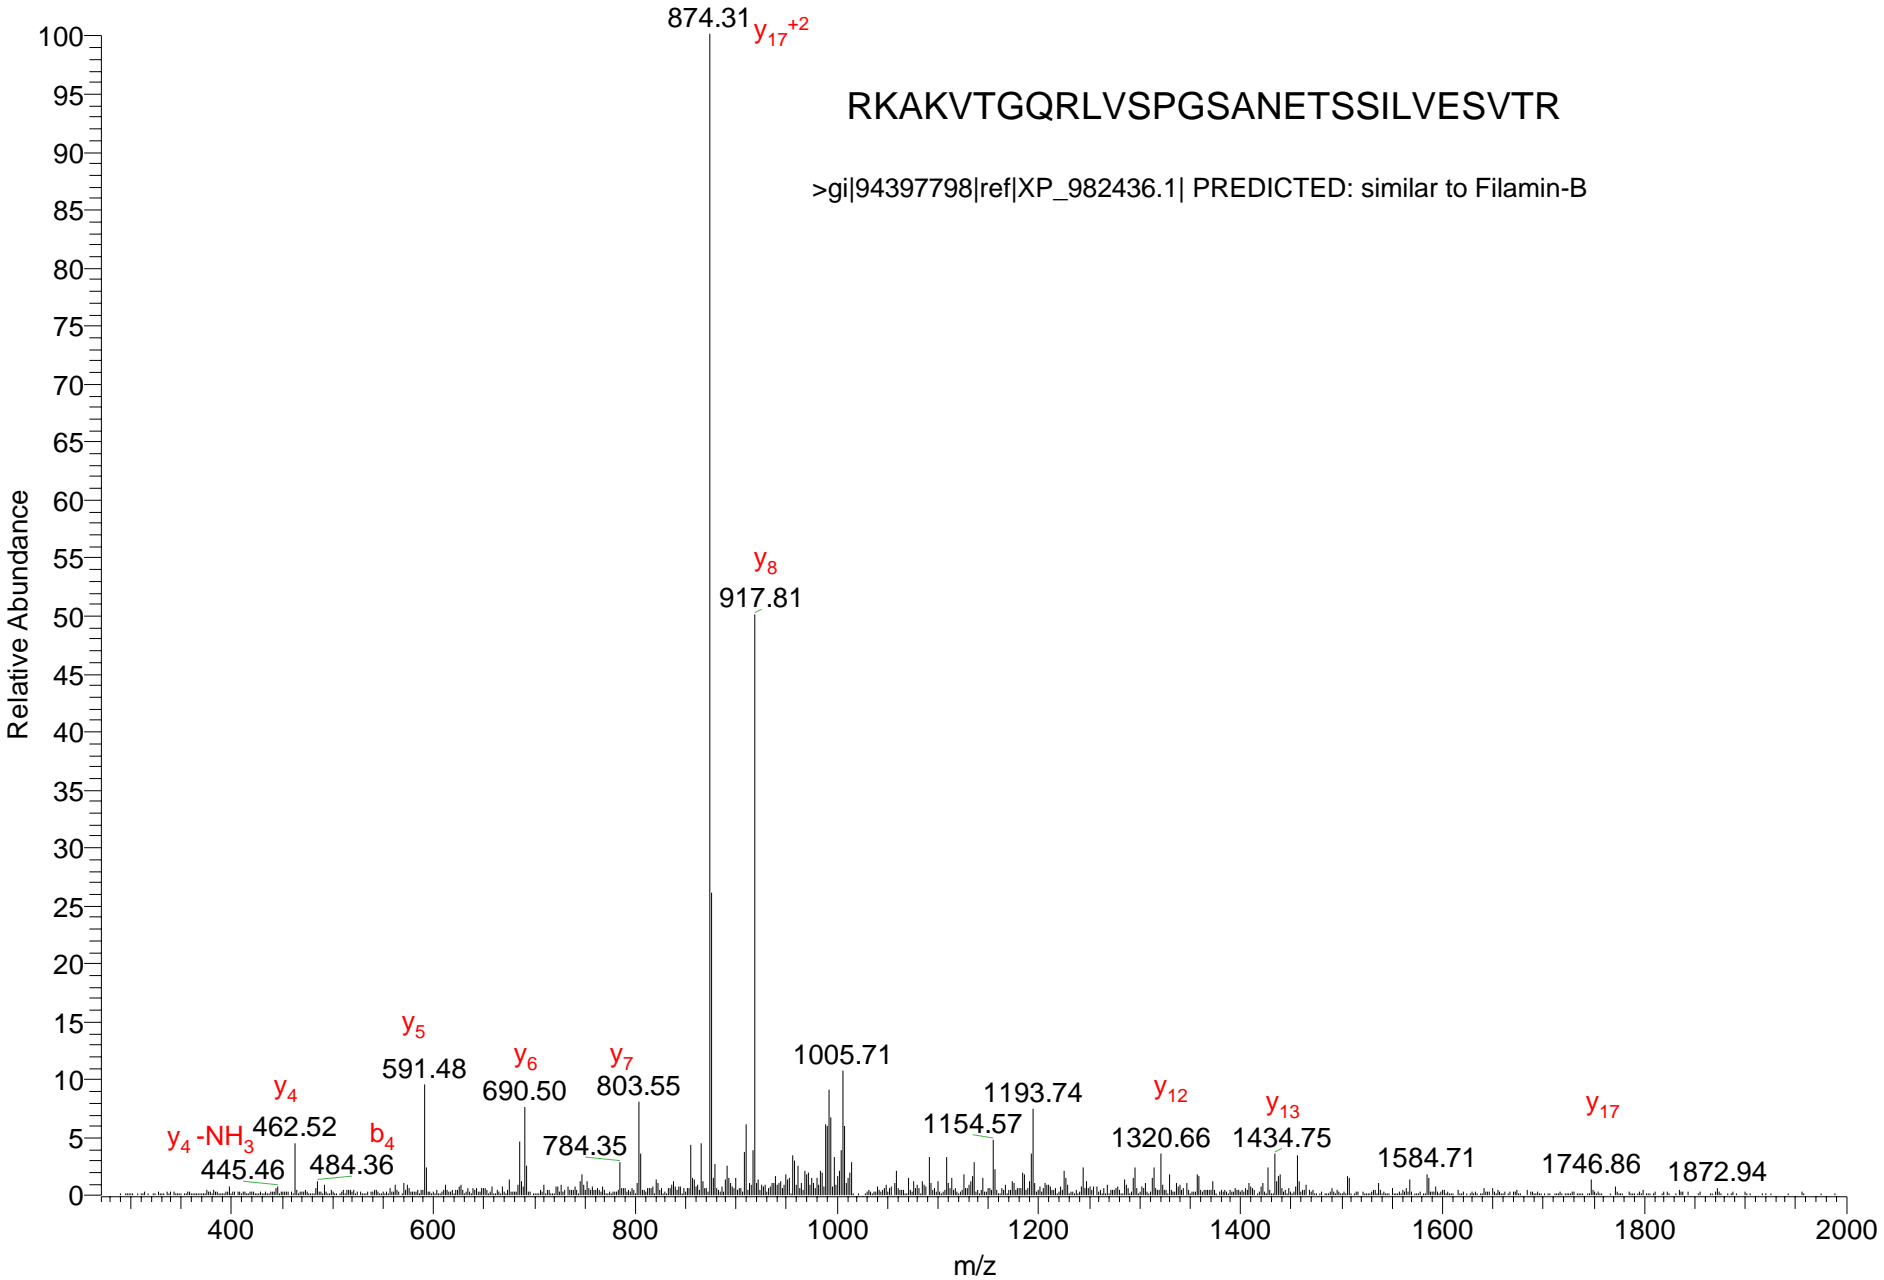

# Figure 22

RDIARQVGEDCRTVPLAGHVGFDLPDQLVNK

>gi|123231953|emb|CAM19783.1| septin 6

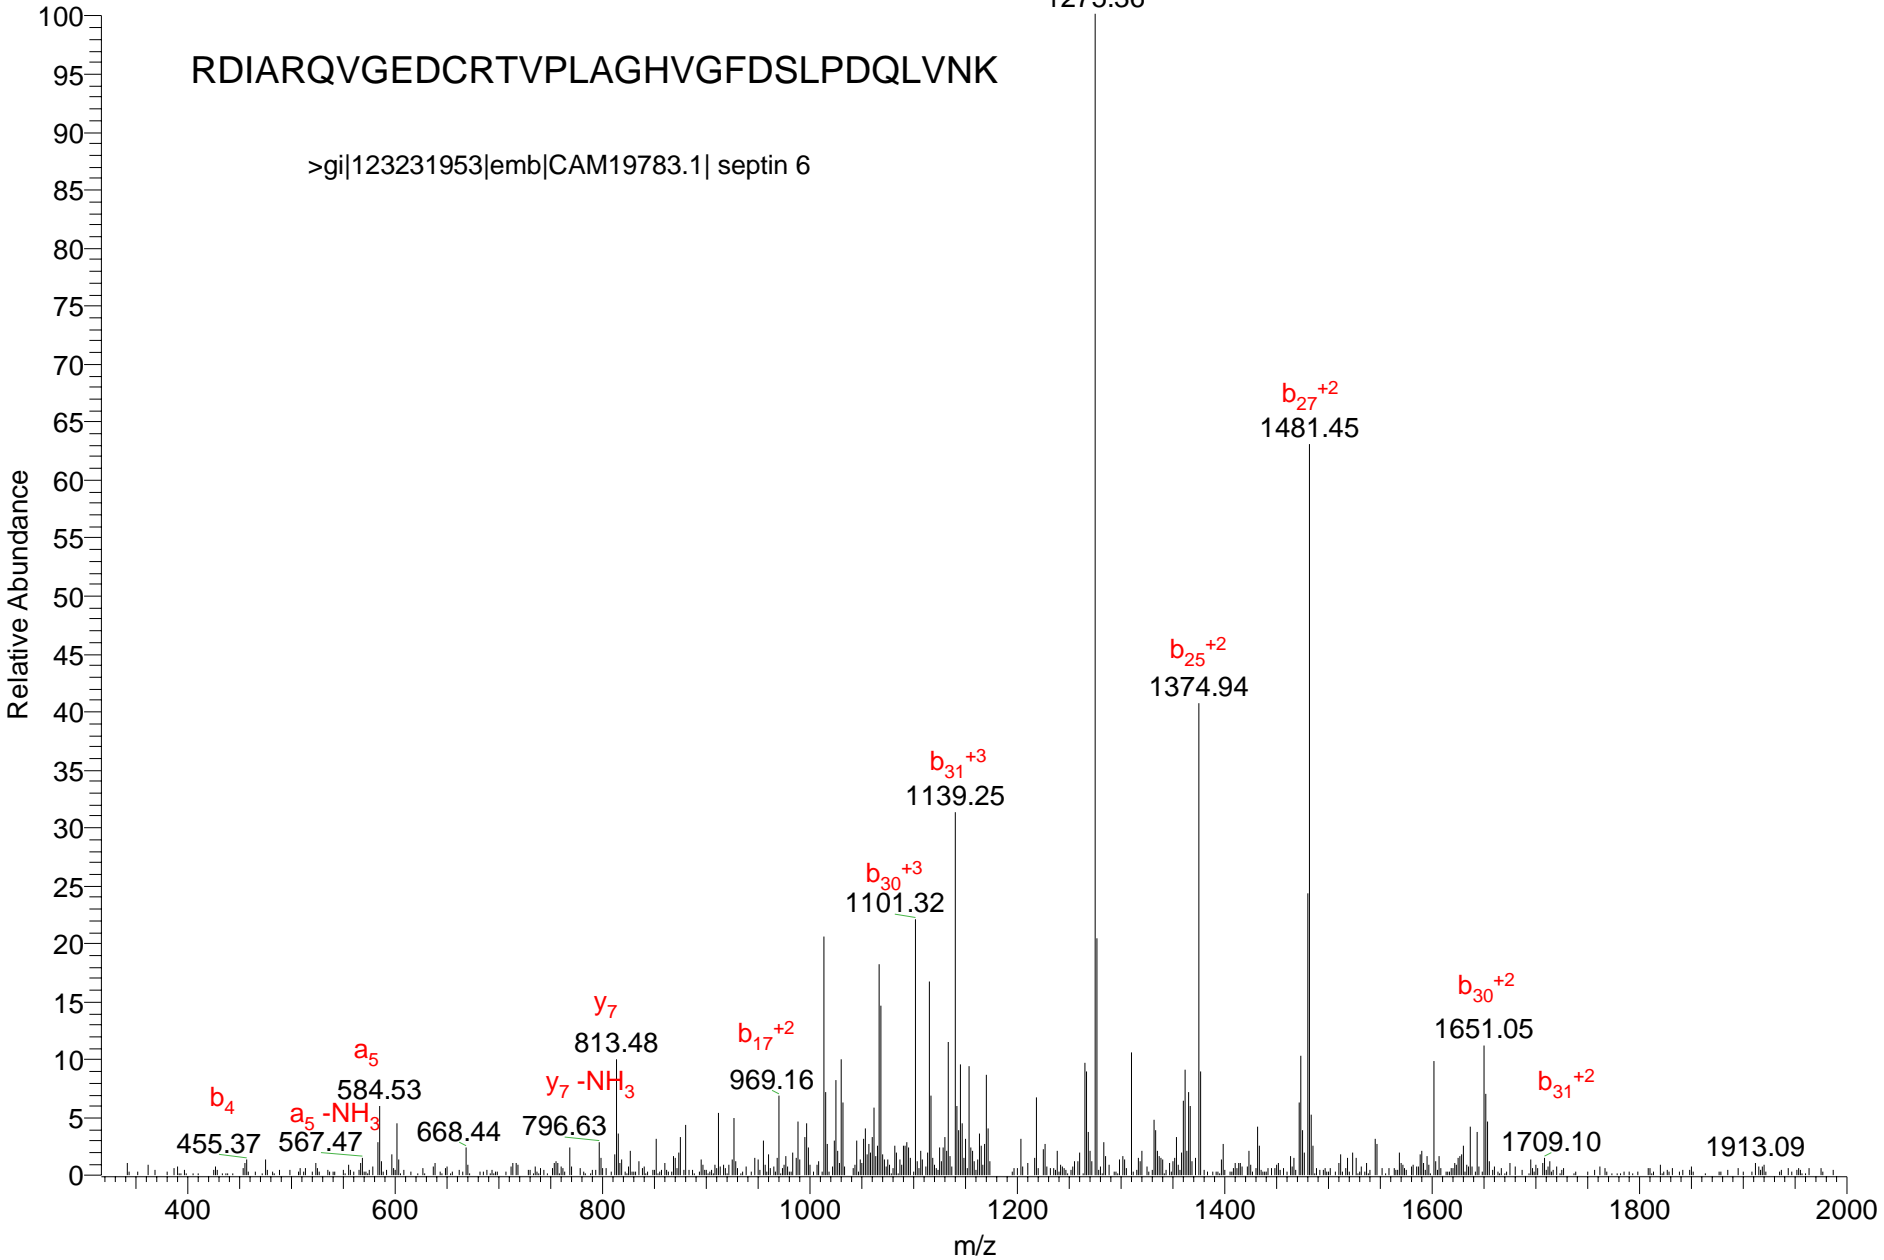

# Figure 23

RAVGIDLGTTYSCVGVFQHGK

>gi|42542422|gb|AAH66191.1| Heat shock protein 8

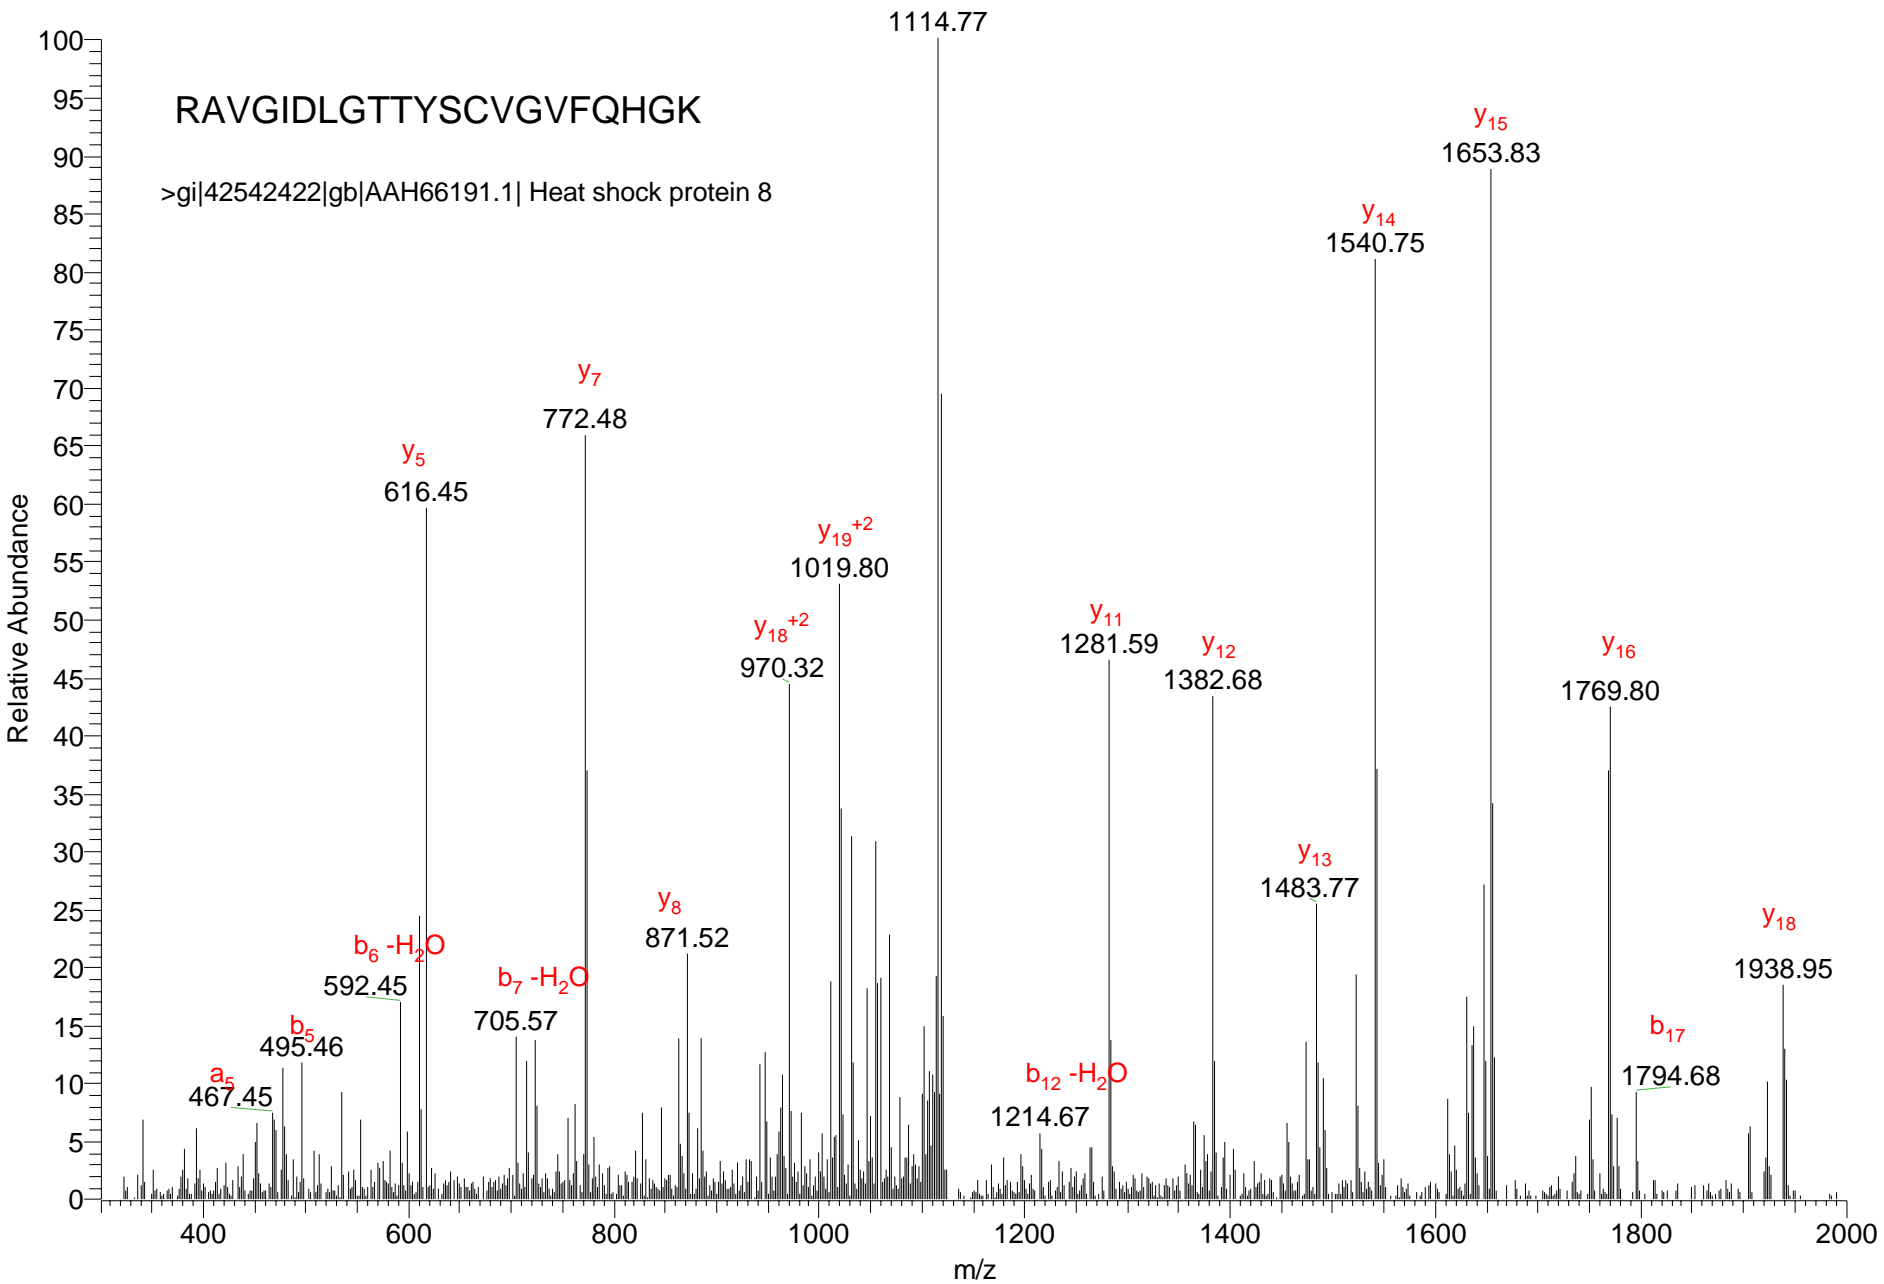



# Figure 24

RTLVMERLQQVLQMESHQSTSDR

>gi|30931411|gb|AAH52711.1| Karyopherin (importin) beta 1

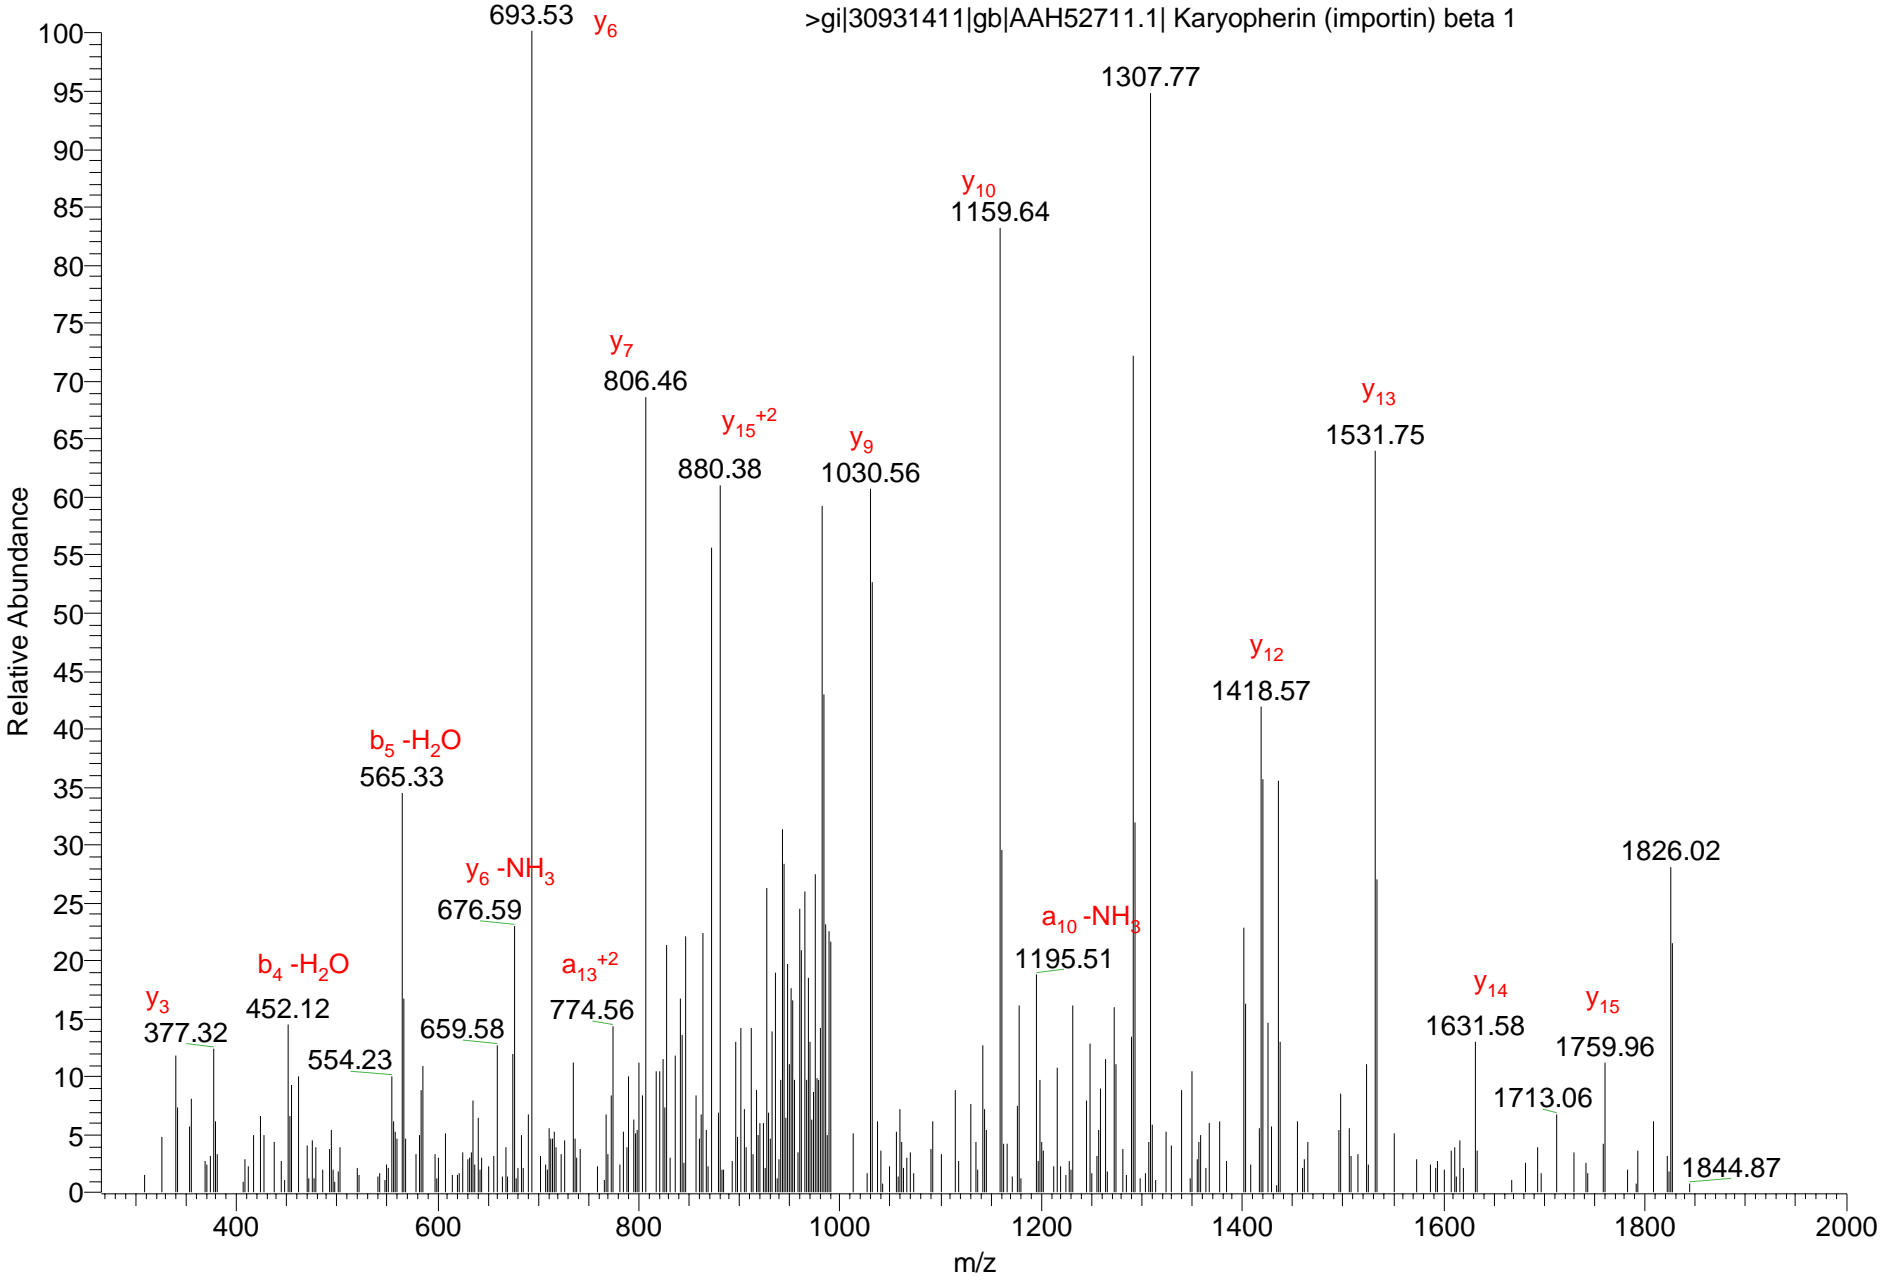

# Figure 25

RVLVGDVKDRVAILVDDMADTCGTICHAADK

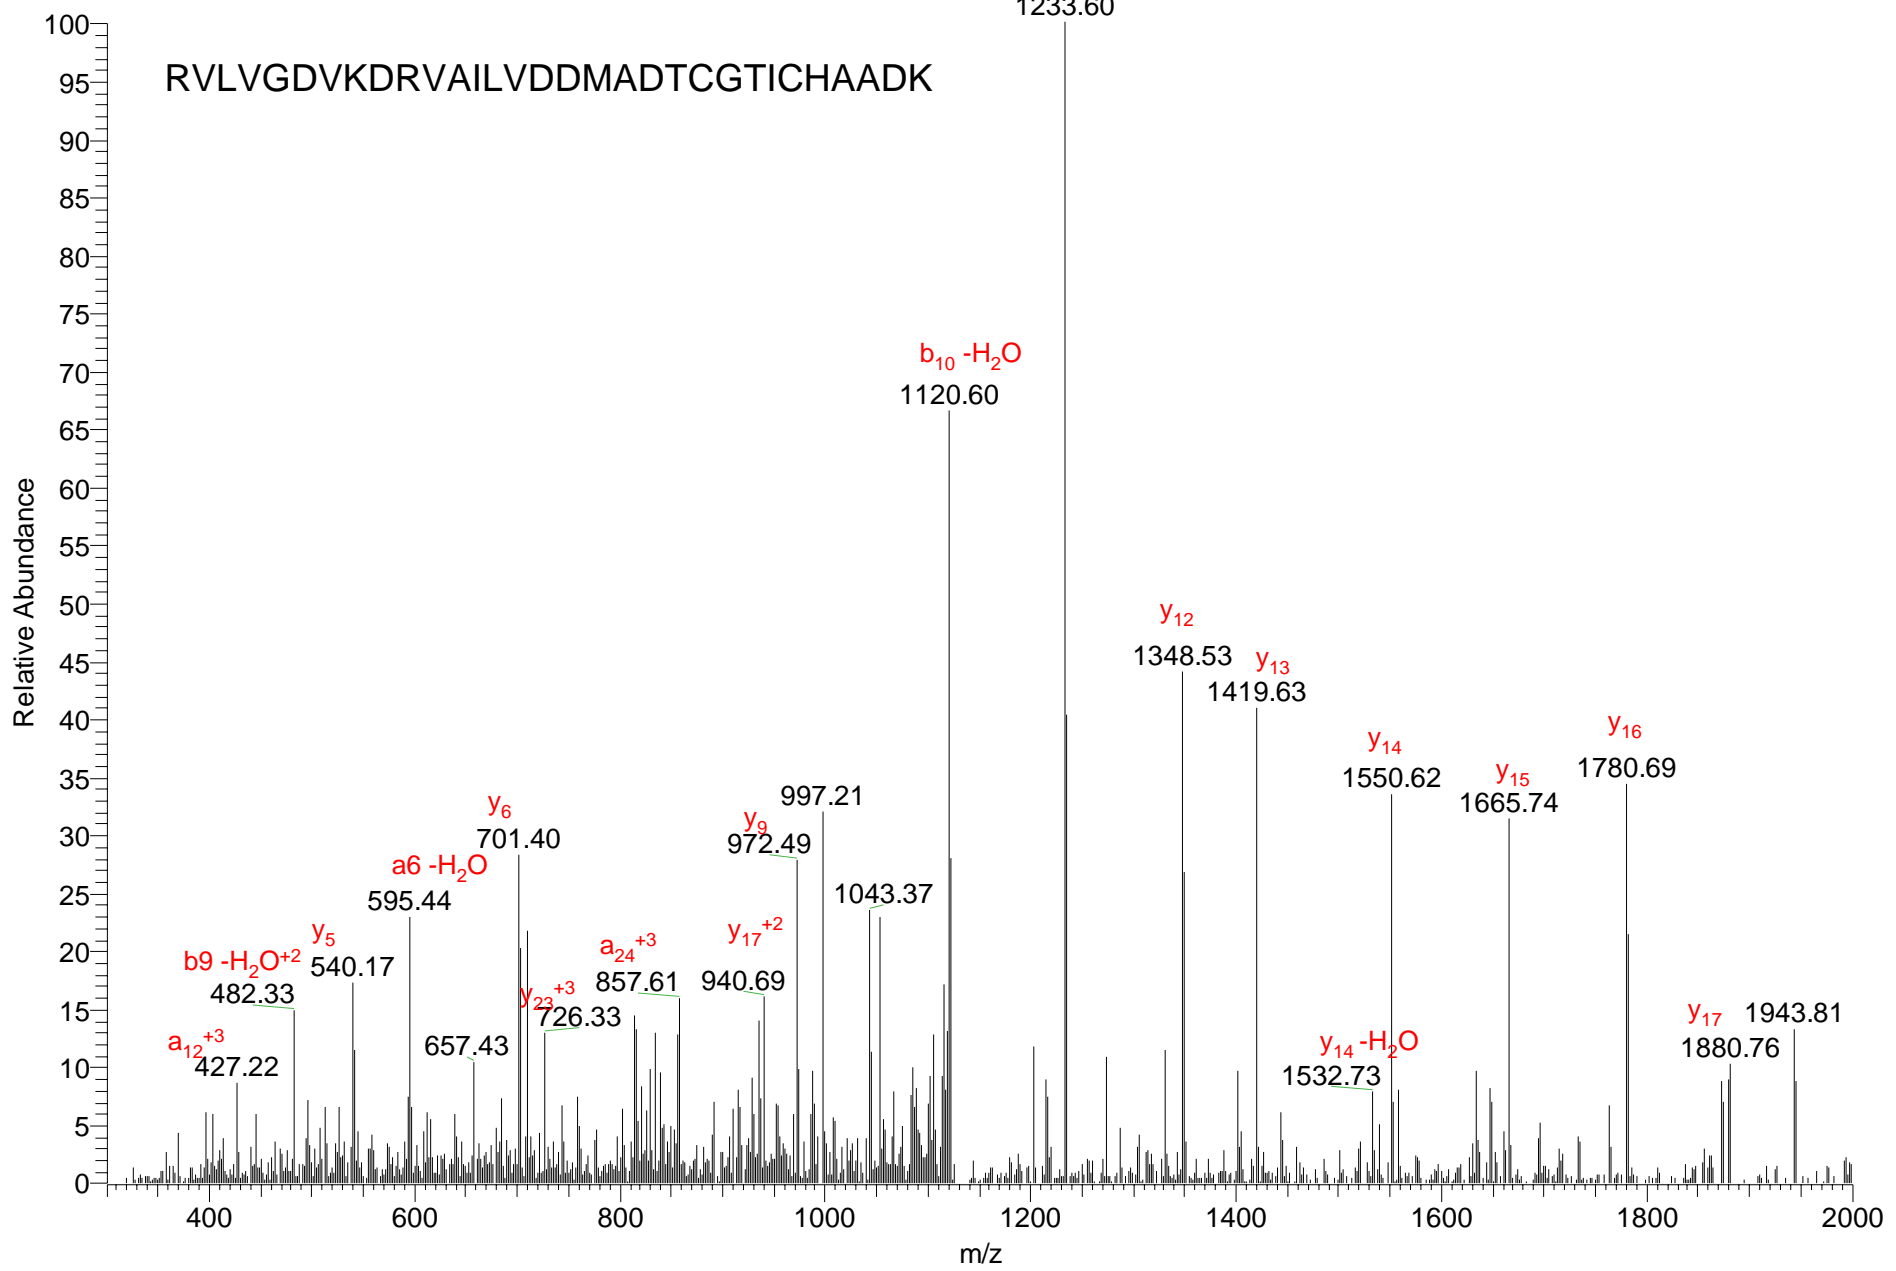

# Figure 26

RCQSHRLTVEDPVTVEYITR

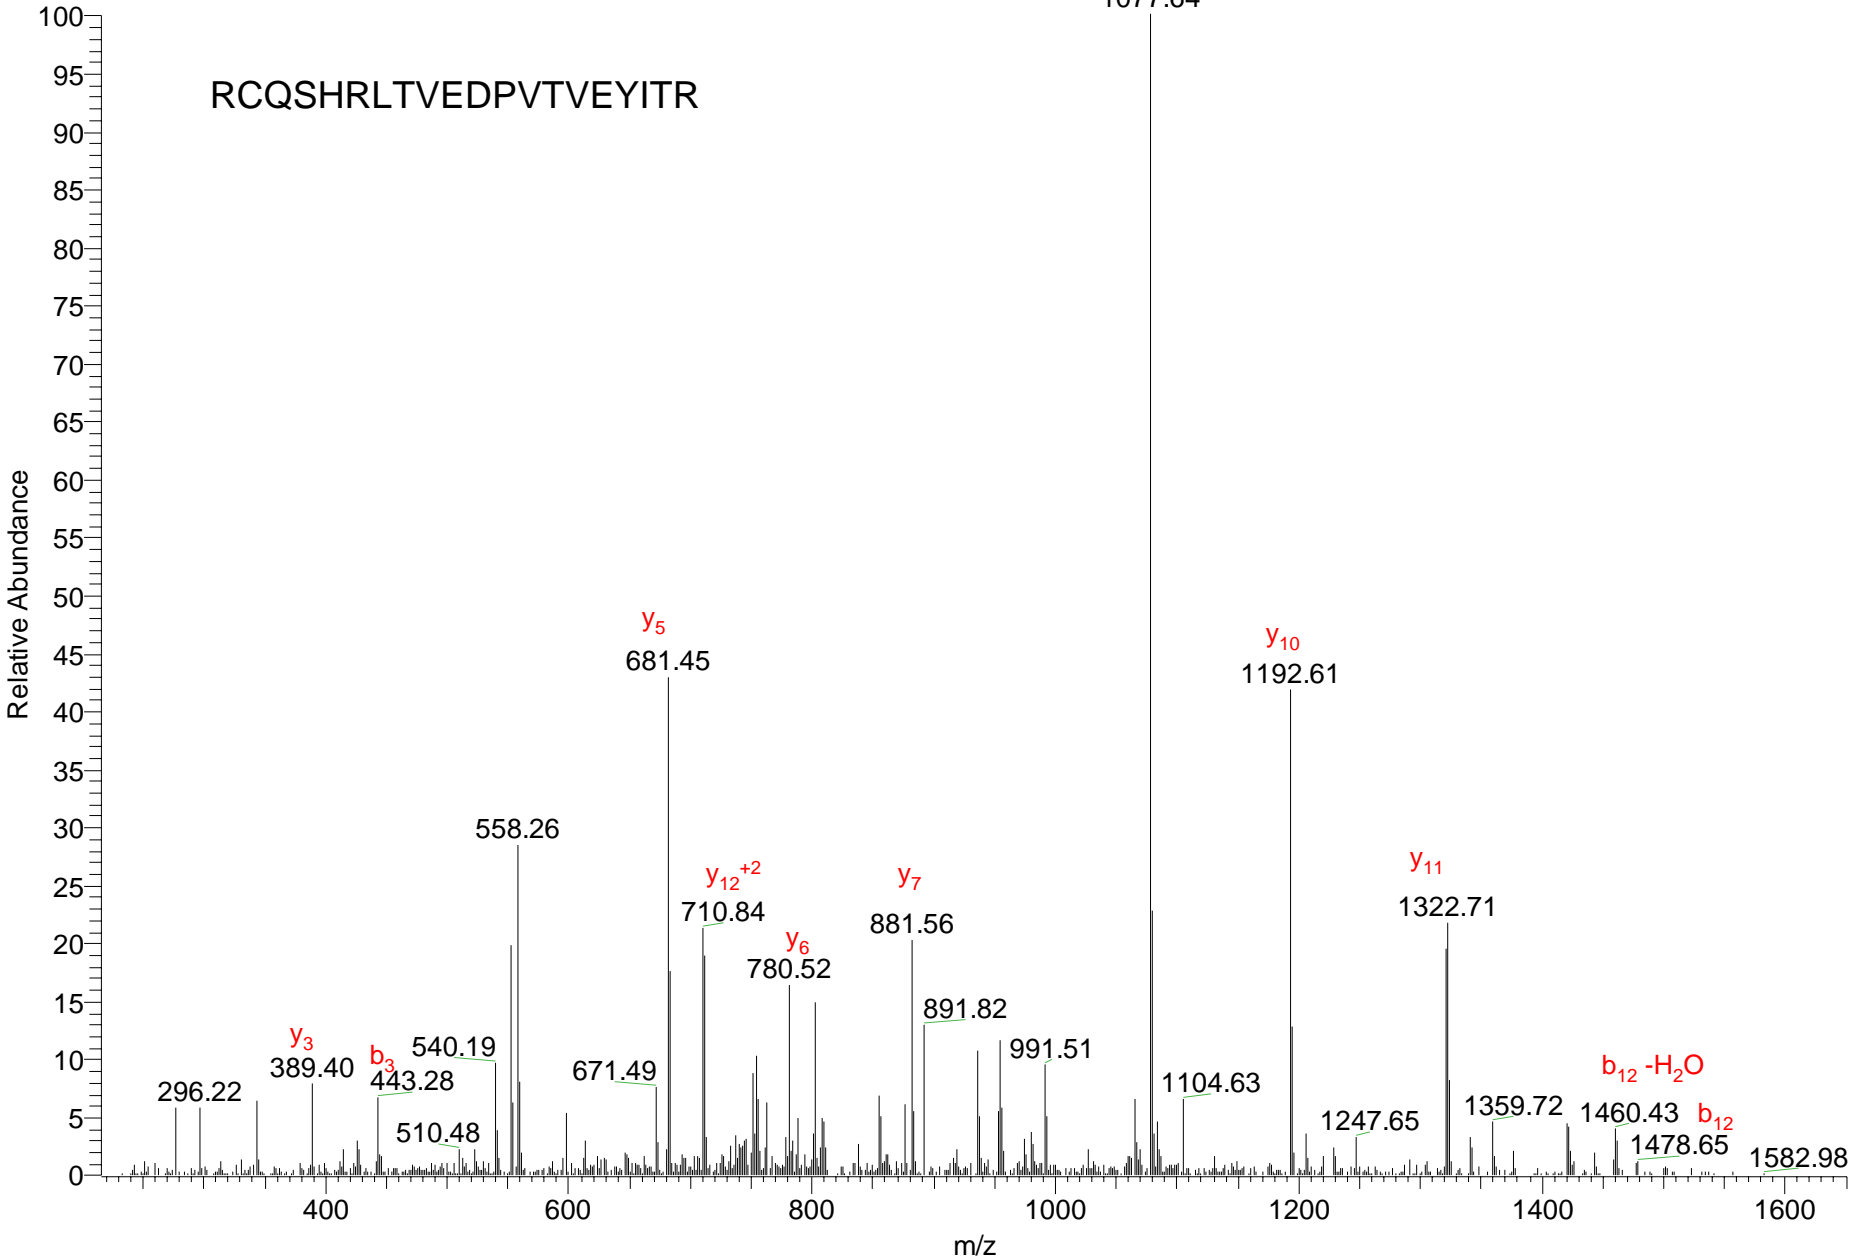

# Figure 27

>gi|61098124|ref|NP\_080896.2| family with sequence similarity 98, member B

RELGPETSMEGDVLDLTLEALGYK

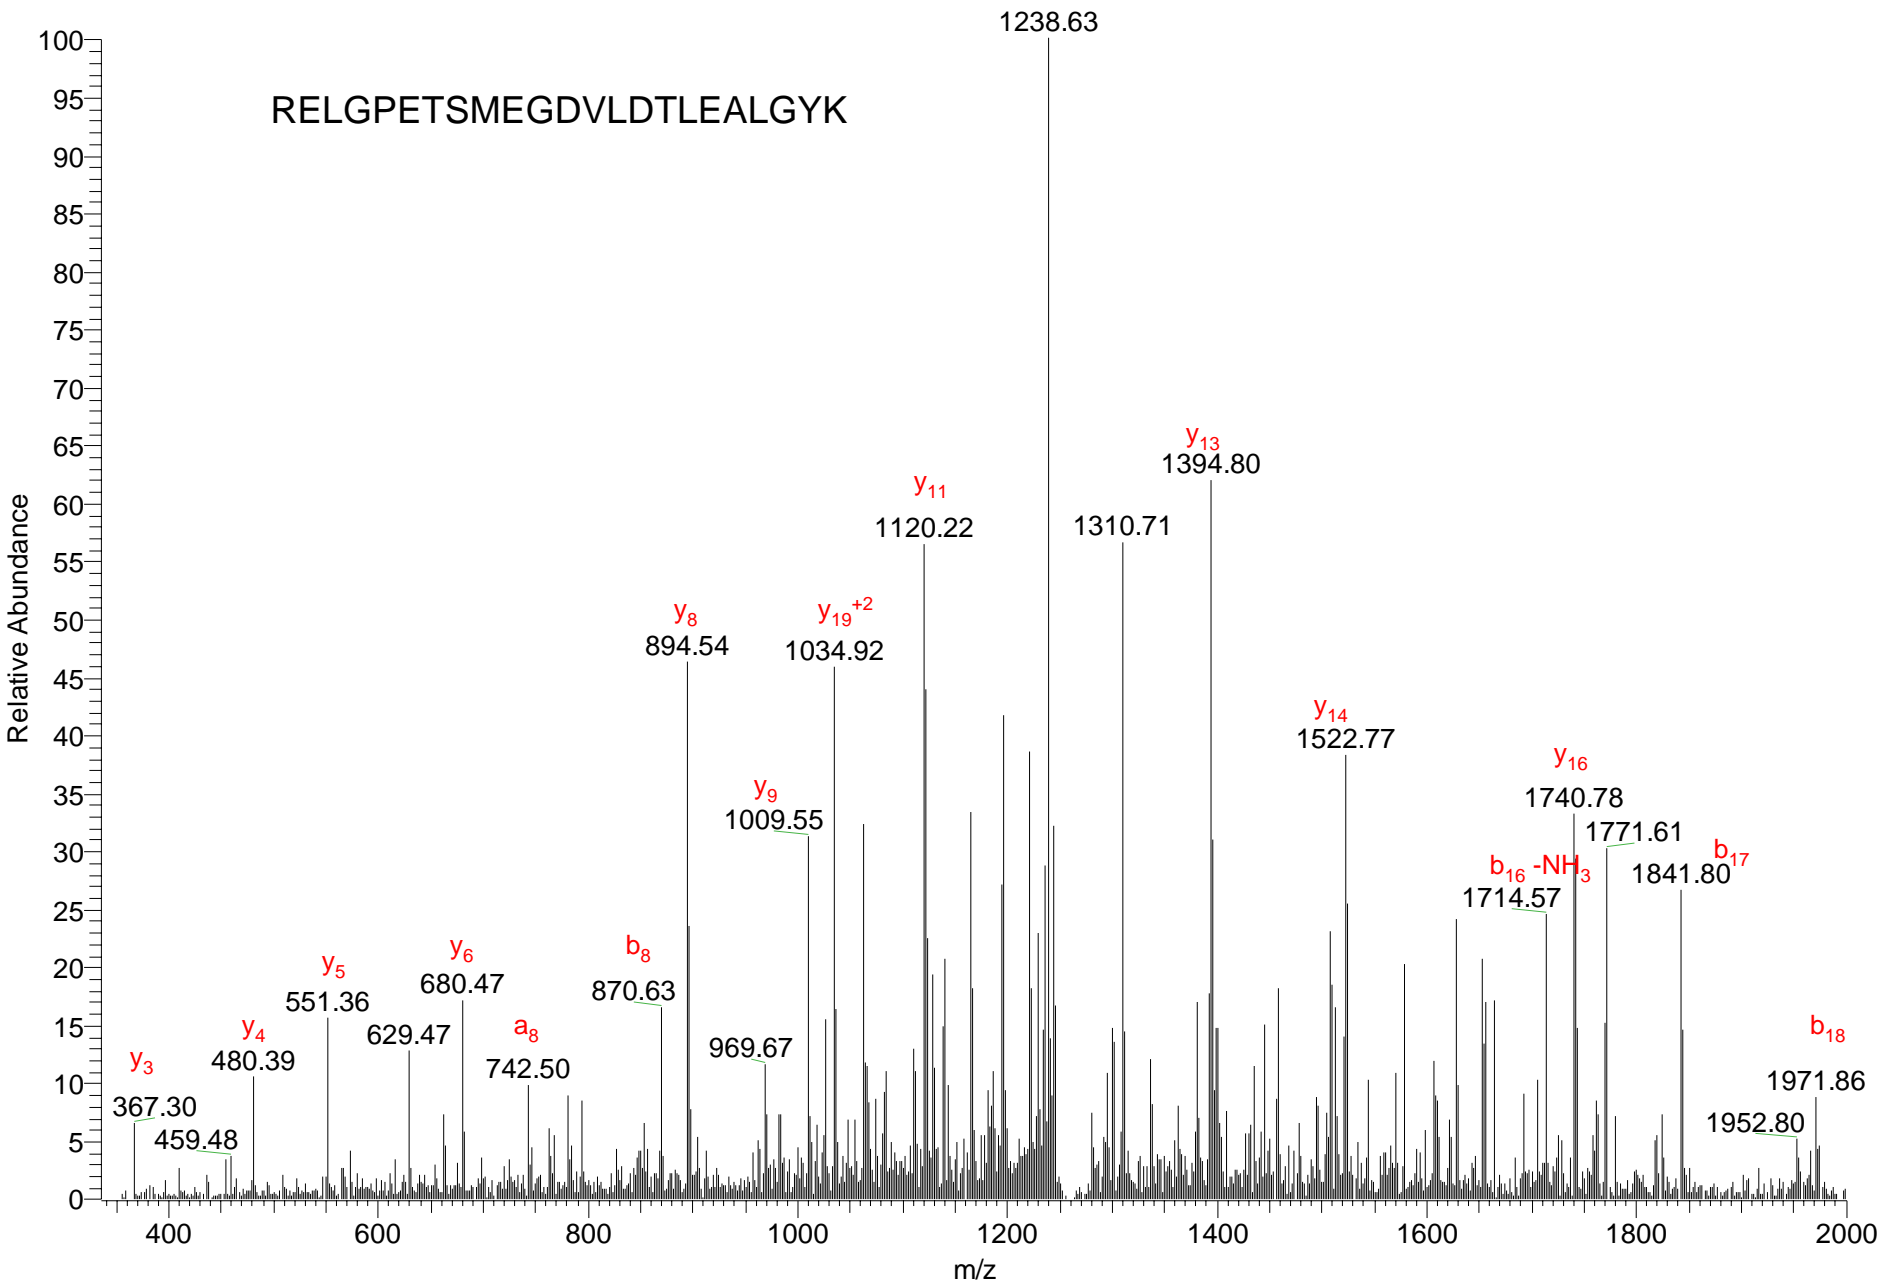

# Figure 28

RTTENS LVALSVPAEDDTCNSQVK

>gi|21619381|gb|AAH31490.1| Lima1 protein

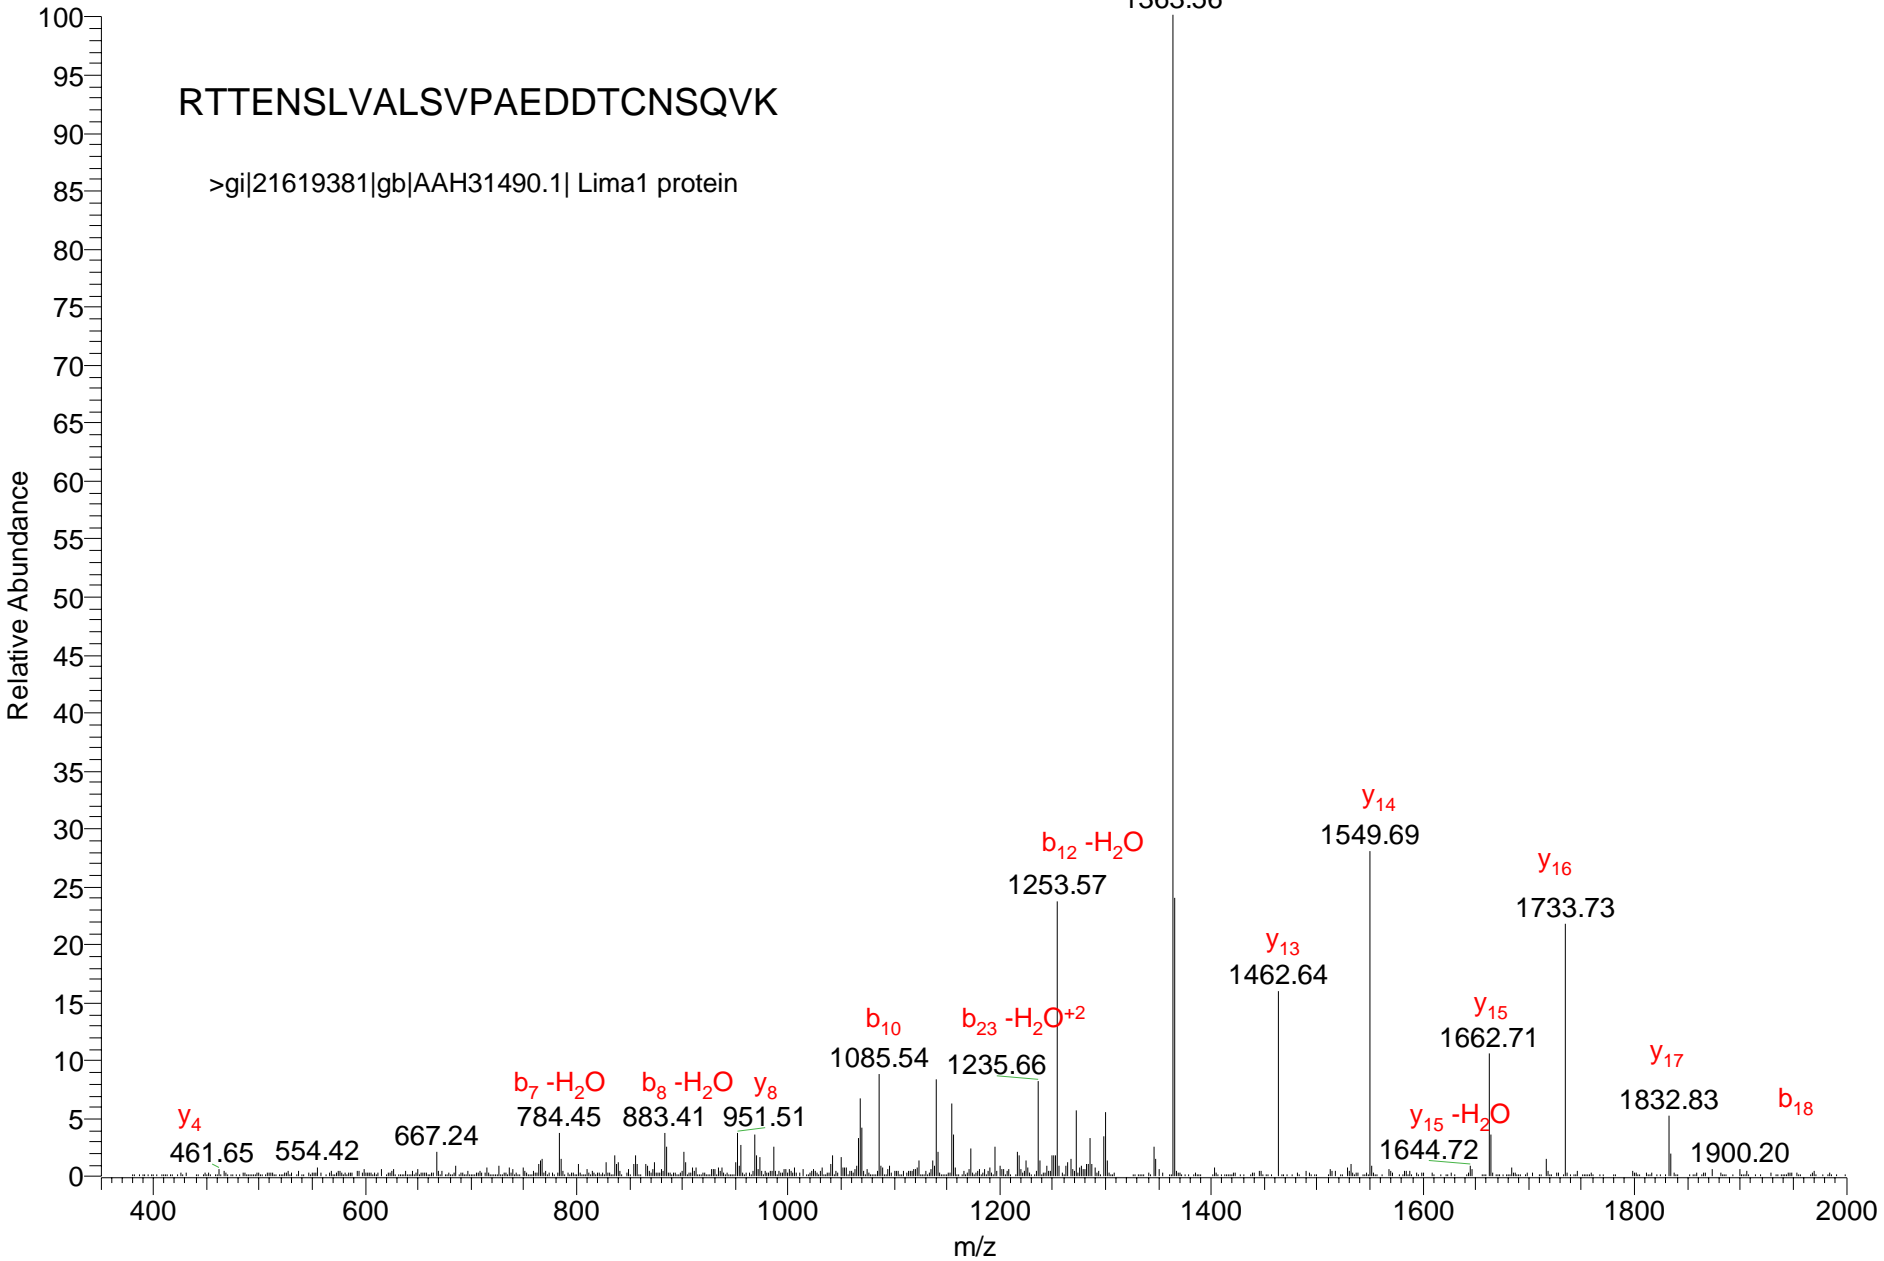

# Figure 29

RTSDVANAVLDGADCIMLSGETAK

>gi|8567390|ref|NP\_038659.1| pyruvate kinase liver and red blood cell

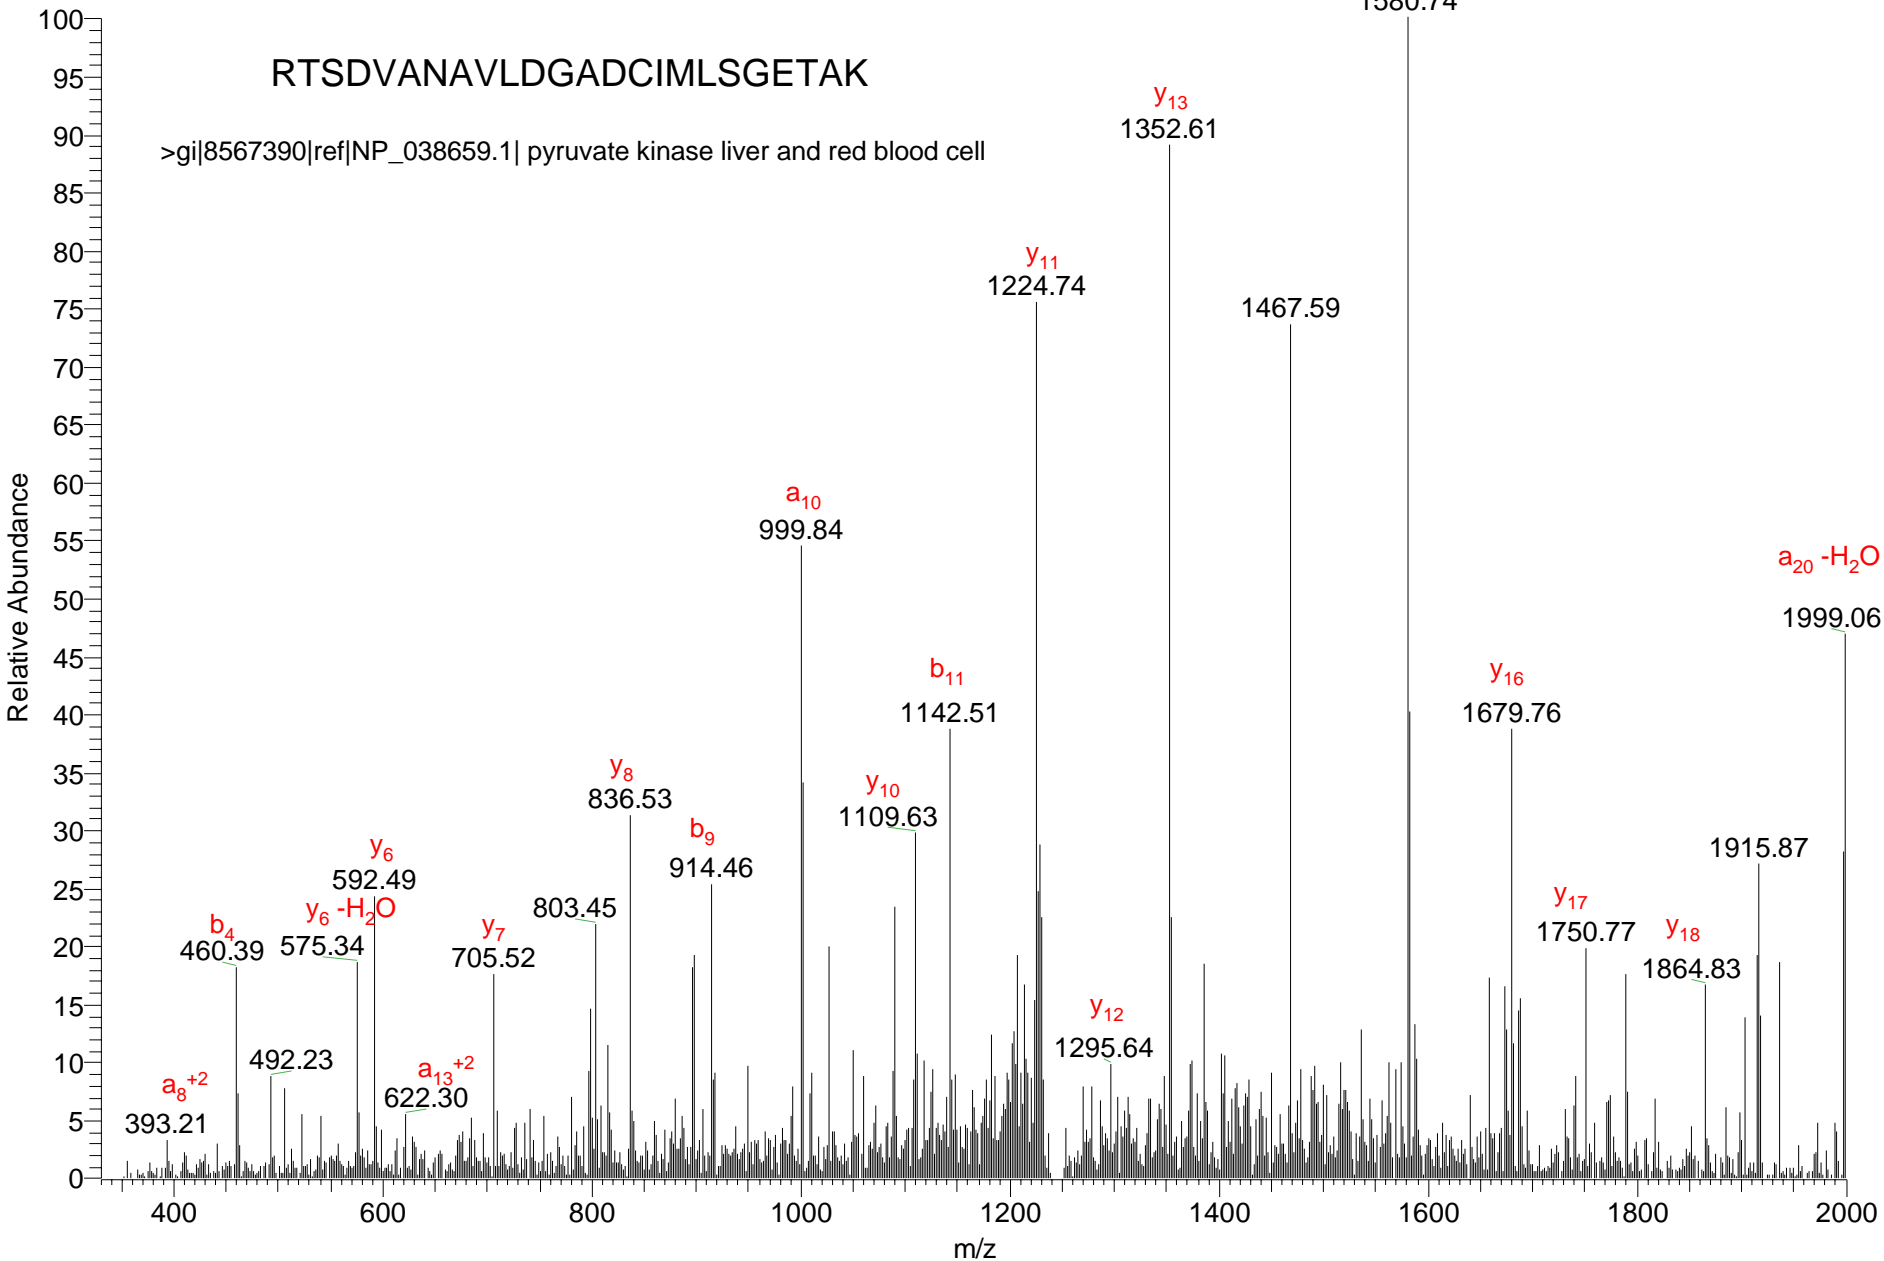

# Figure 30

RLVKKRALIAGGGAPEIELALR

>gi|460317|gb|AAA37418.1| chaperonin

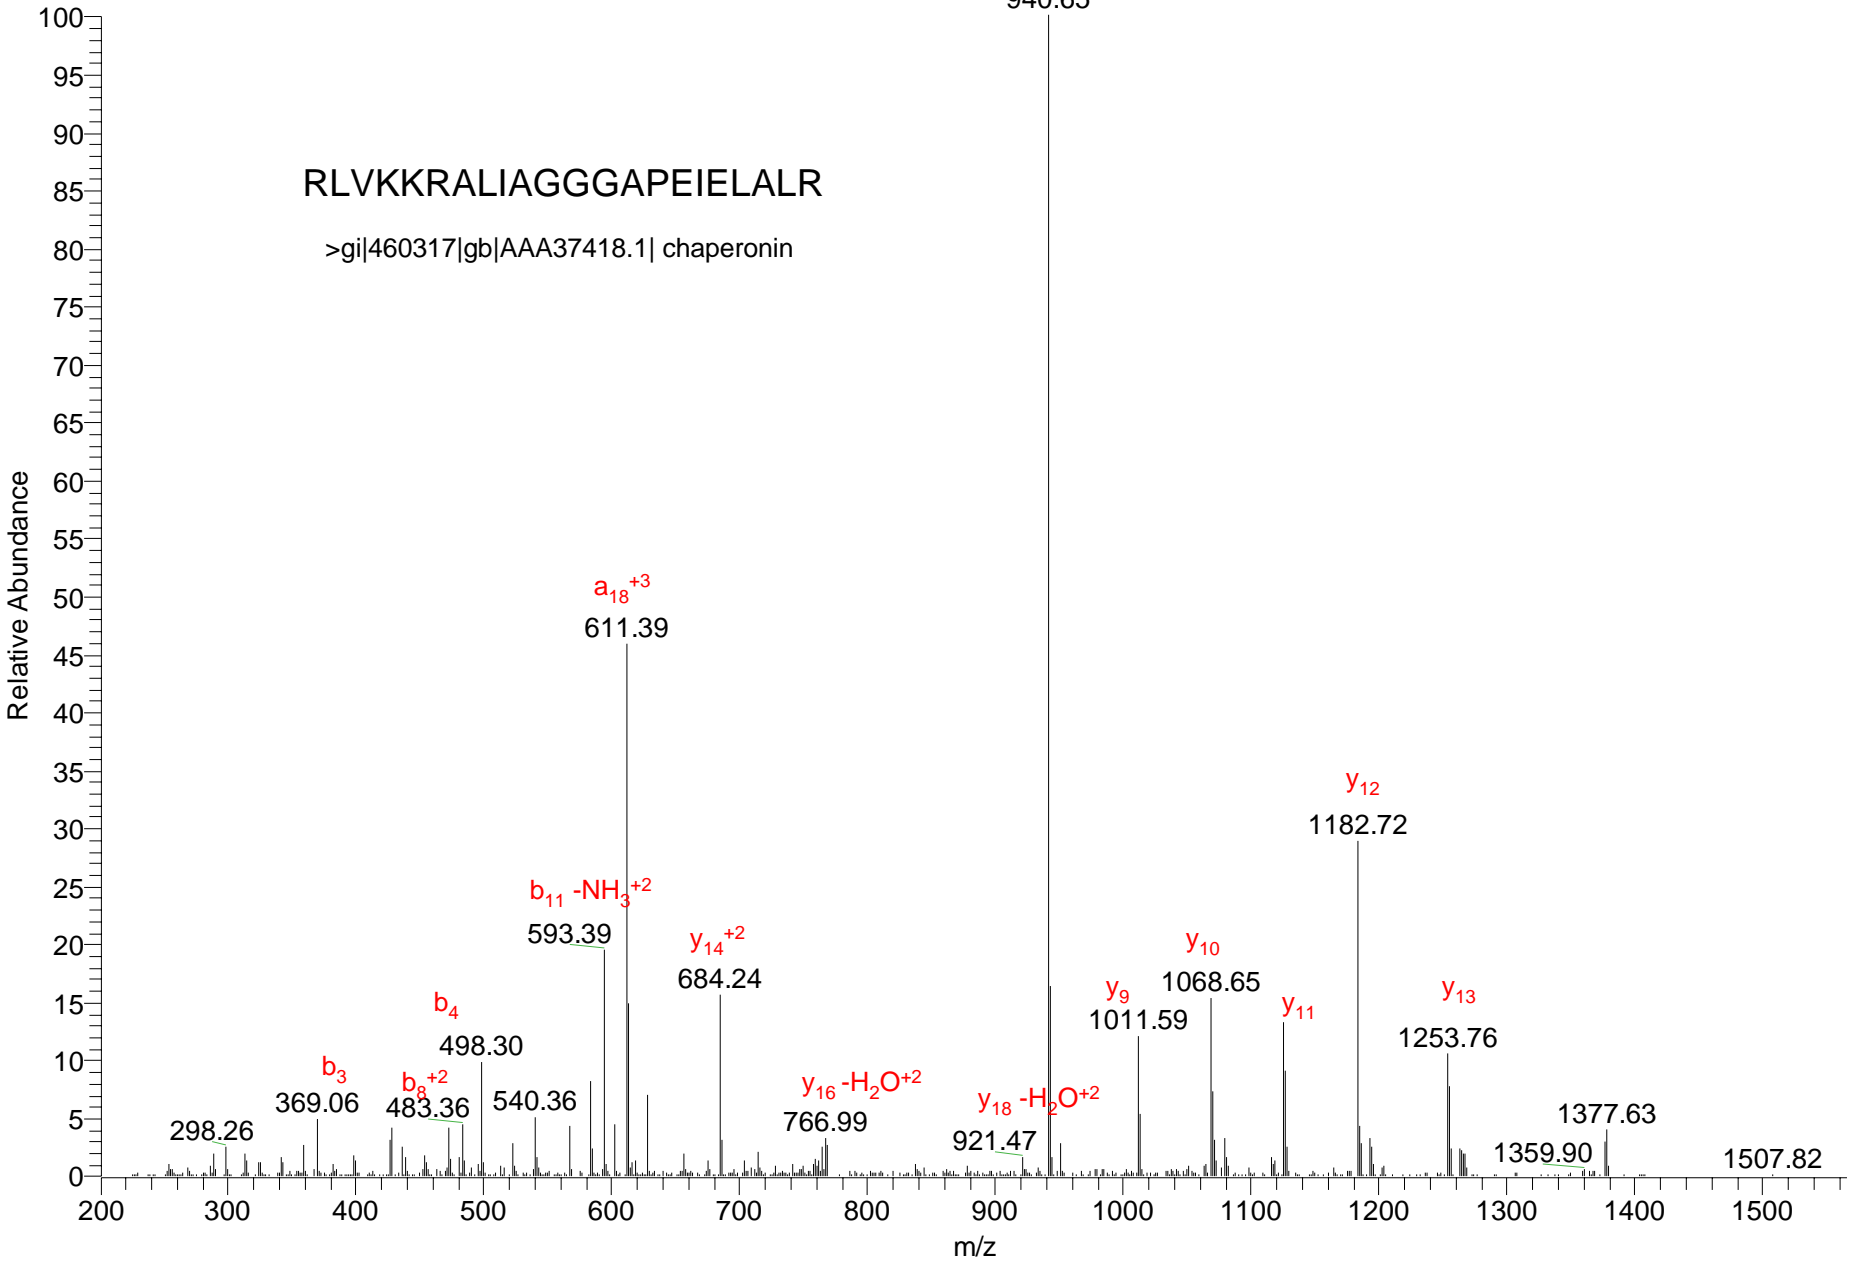

# Figure 31

RTLVA SEDYGD TLAAIQGLLK

>gi|94366368|ref|XP\_993410.1| PREDICTED: spectrin alpha 2 isoform 3

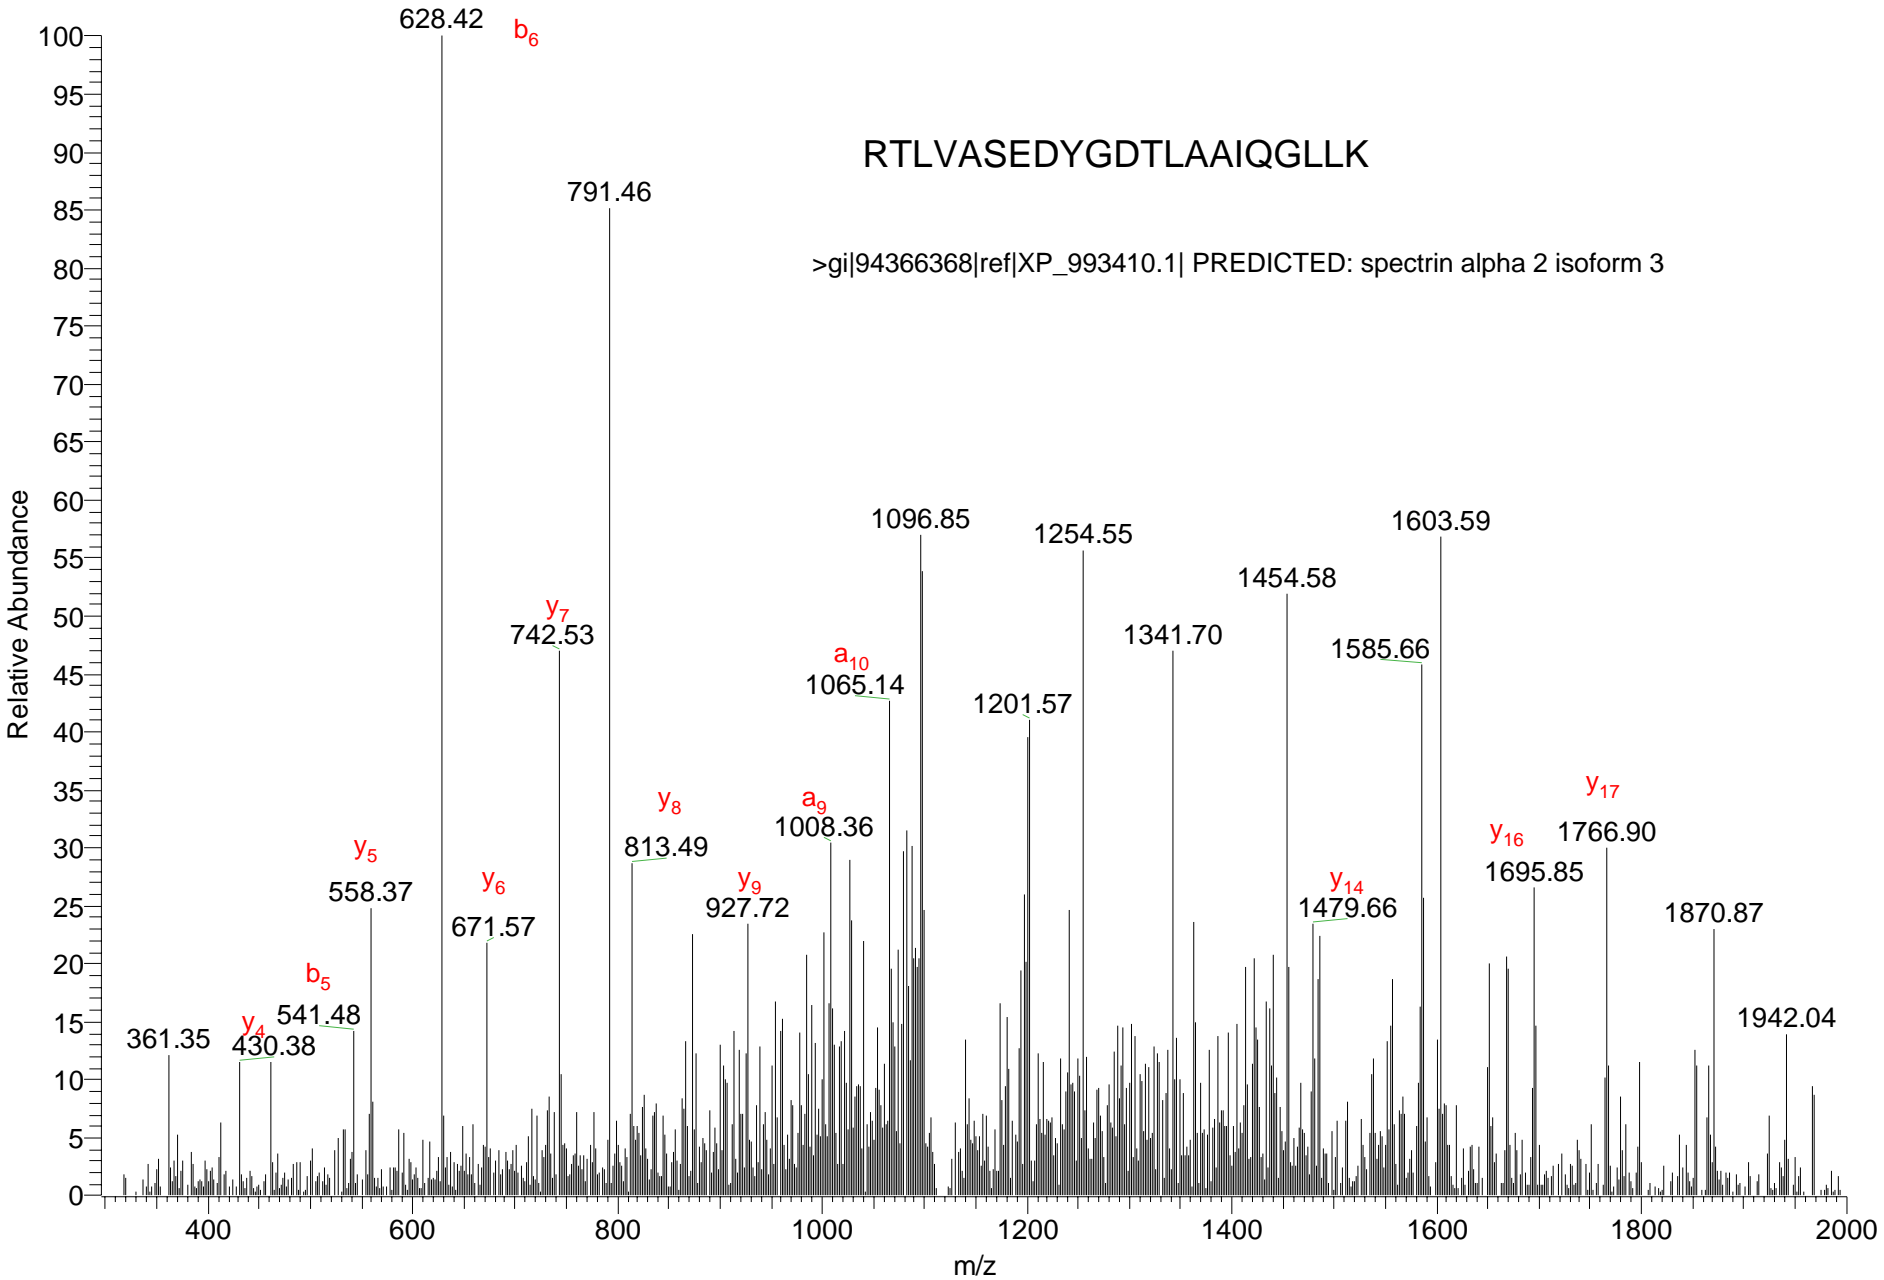



# Figure 32

>gi|21426823|ref|NP\_085112.1| histone 1, H1a

RLAALKKSLAAAGYDVEKNNSR

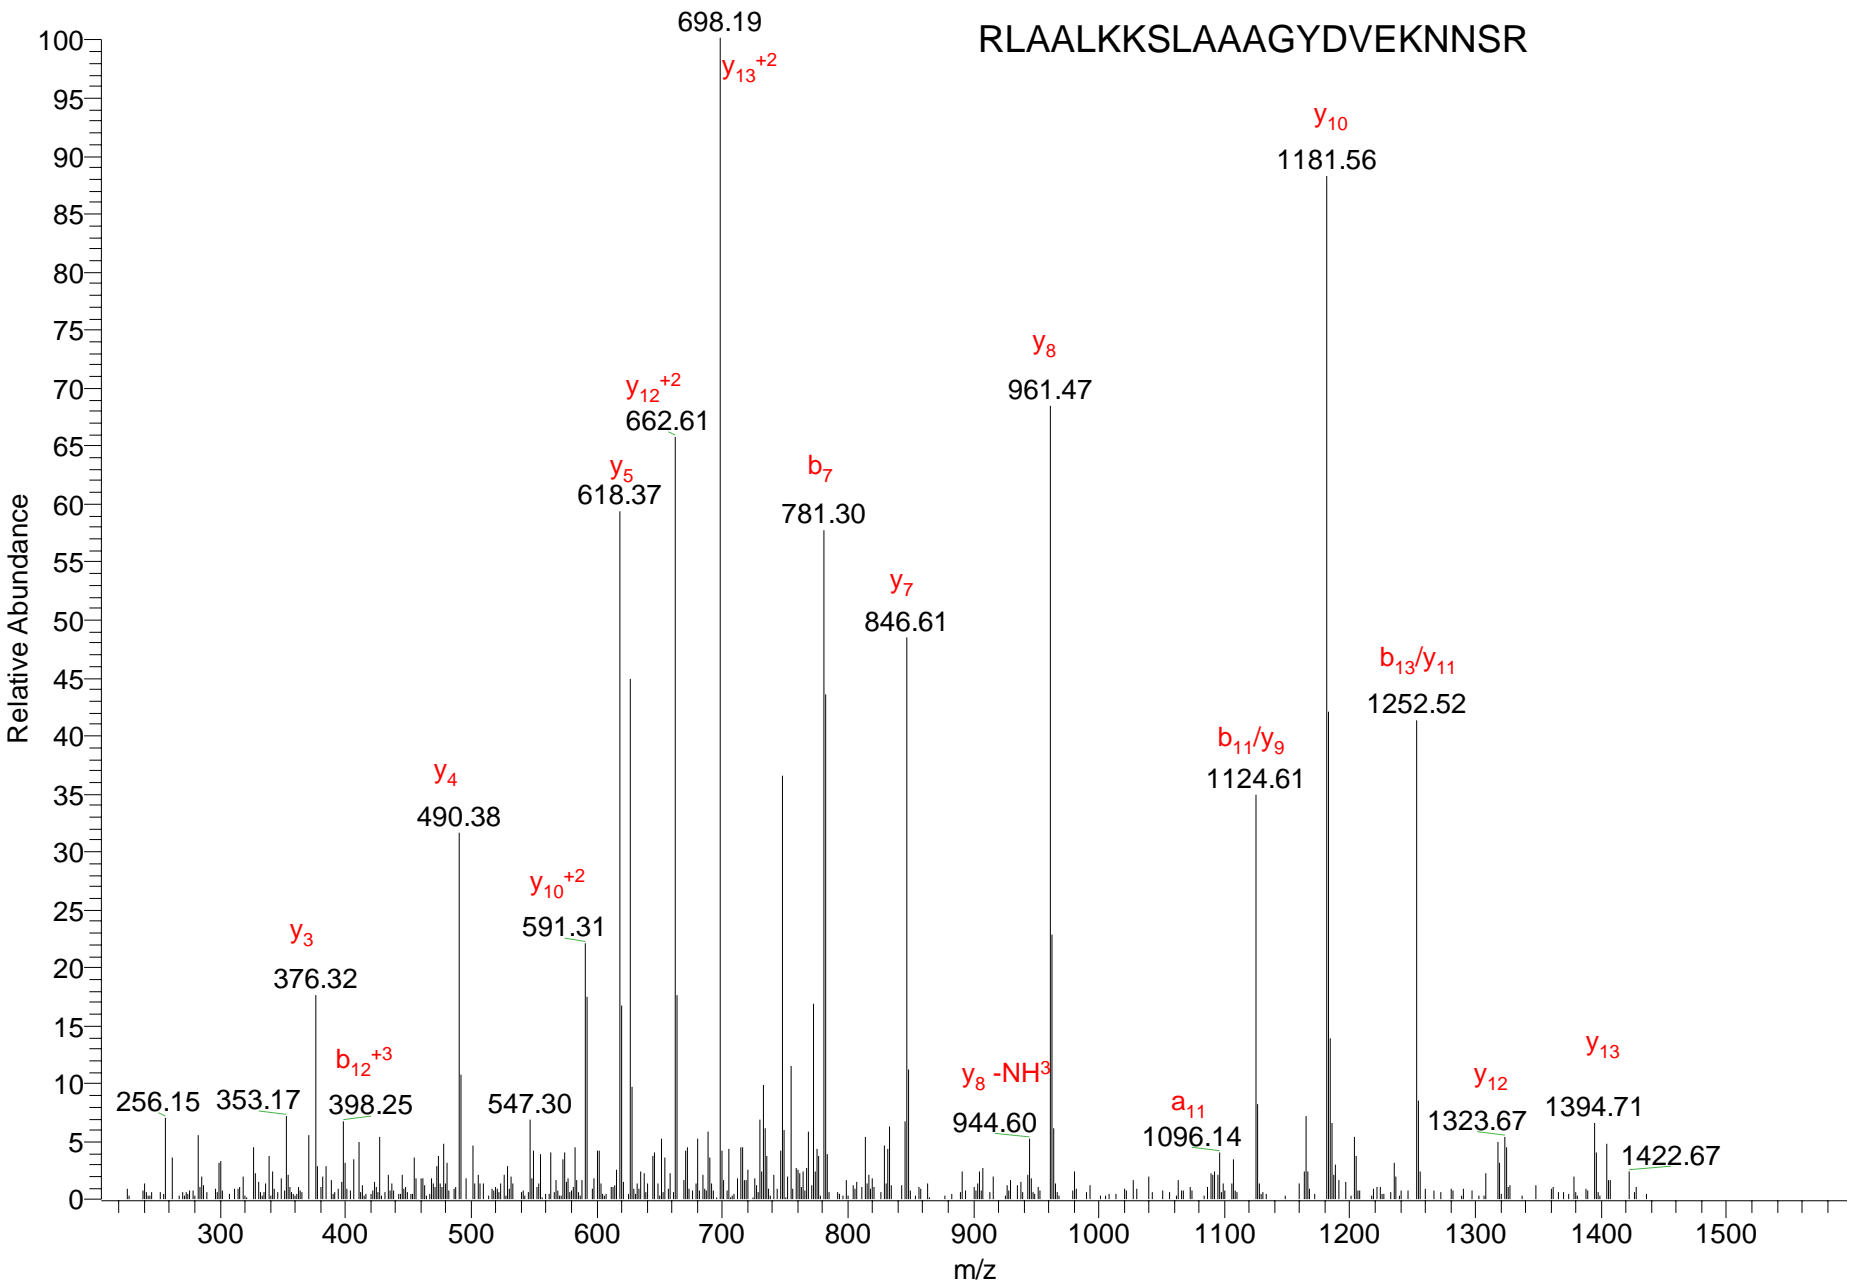

# Figure 33

RSVVHSTDLVVEAIVENLK

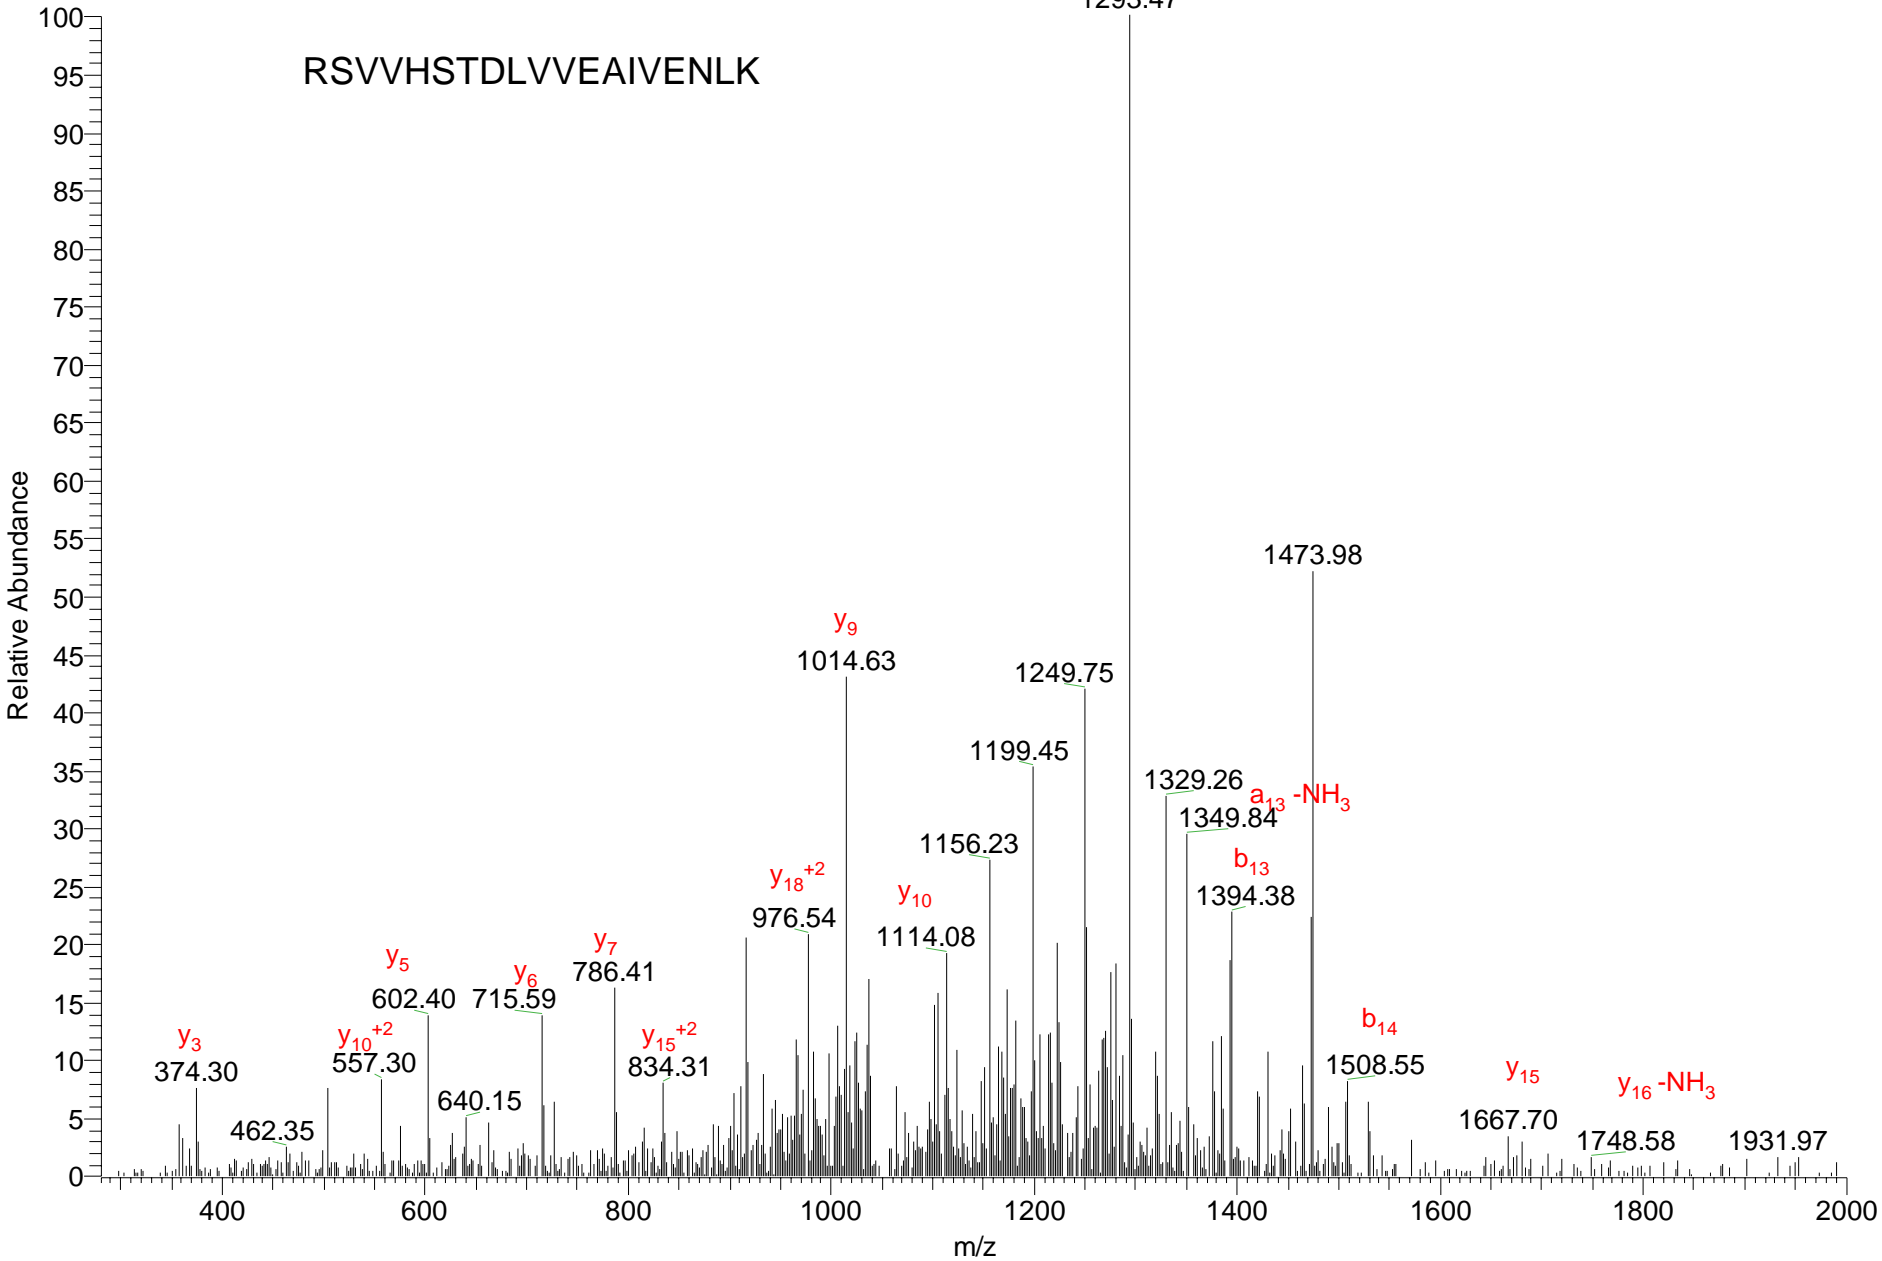

# Figure 34

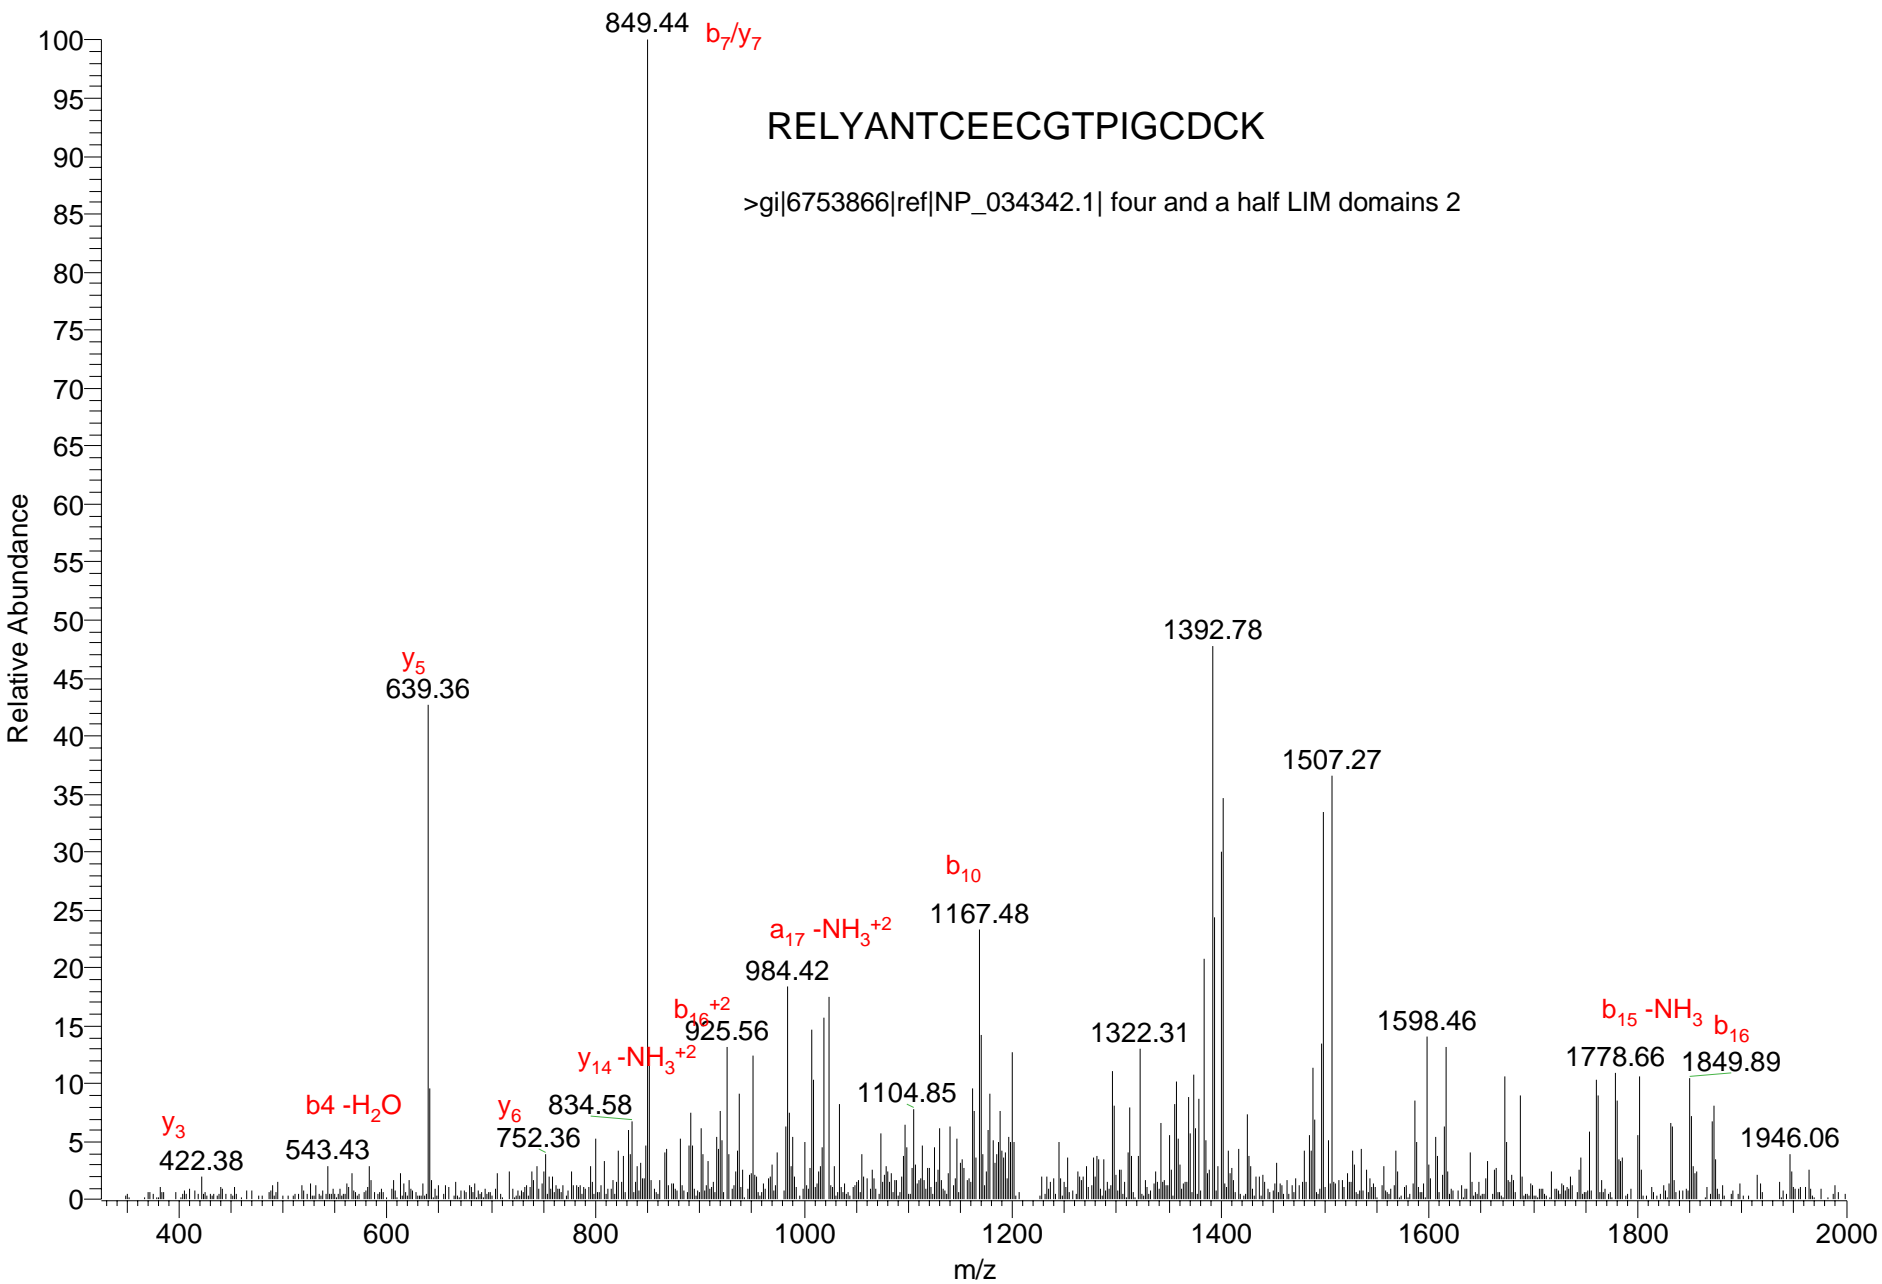

# Figure 35

RNSNIDQSFWETFGSAEPPK

>gi|31542139|ref|NP\_665703.2| ADP-ribosylation factor GTPase activating protein 1

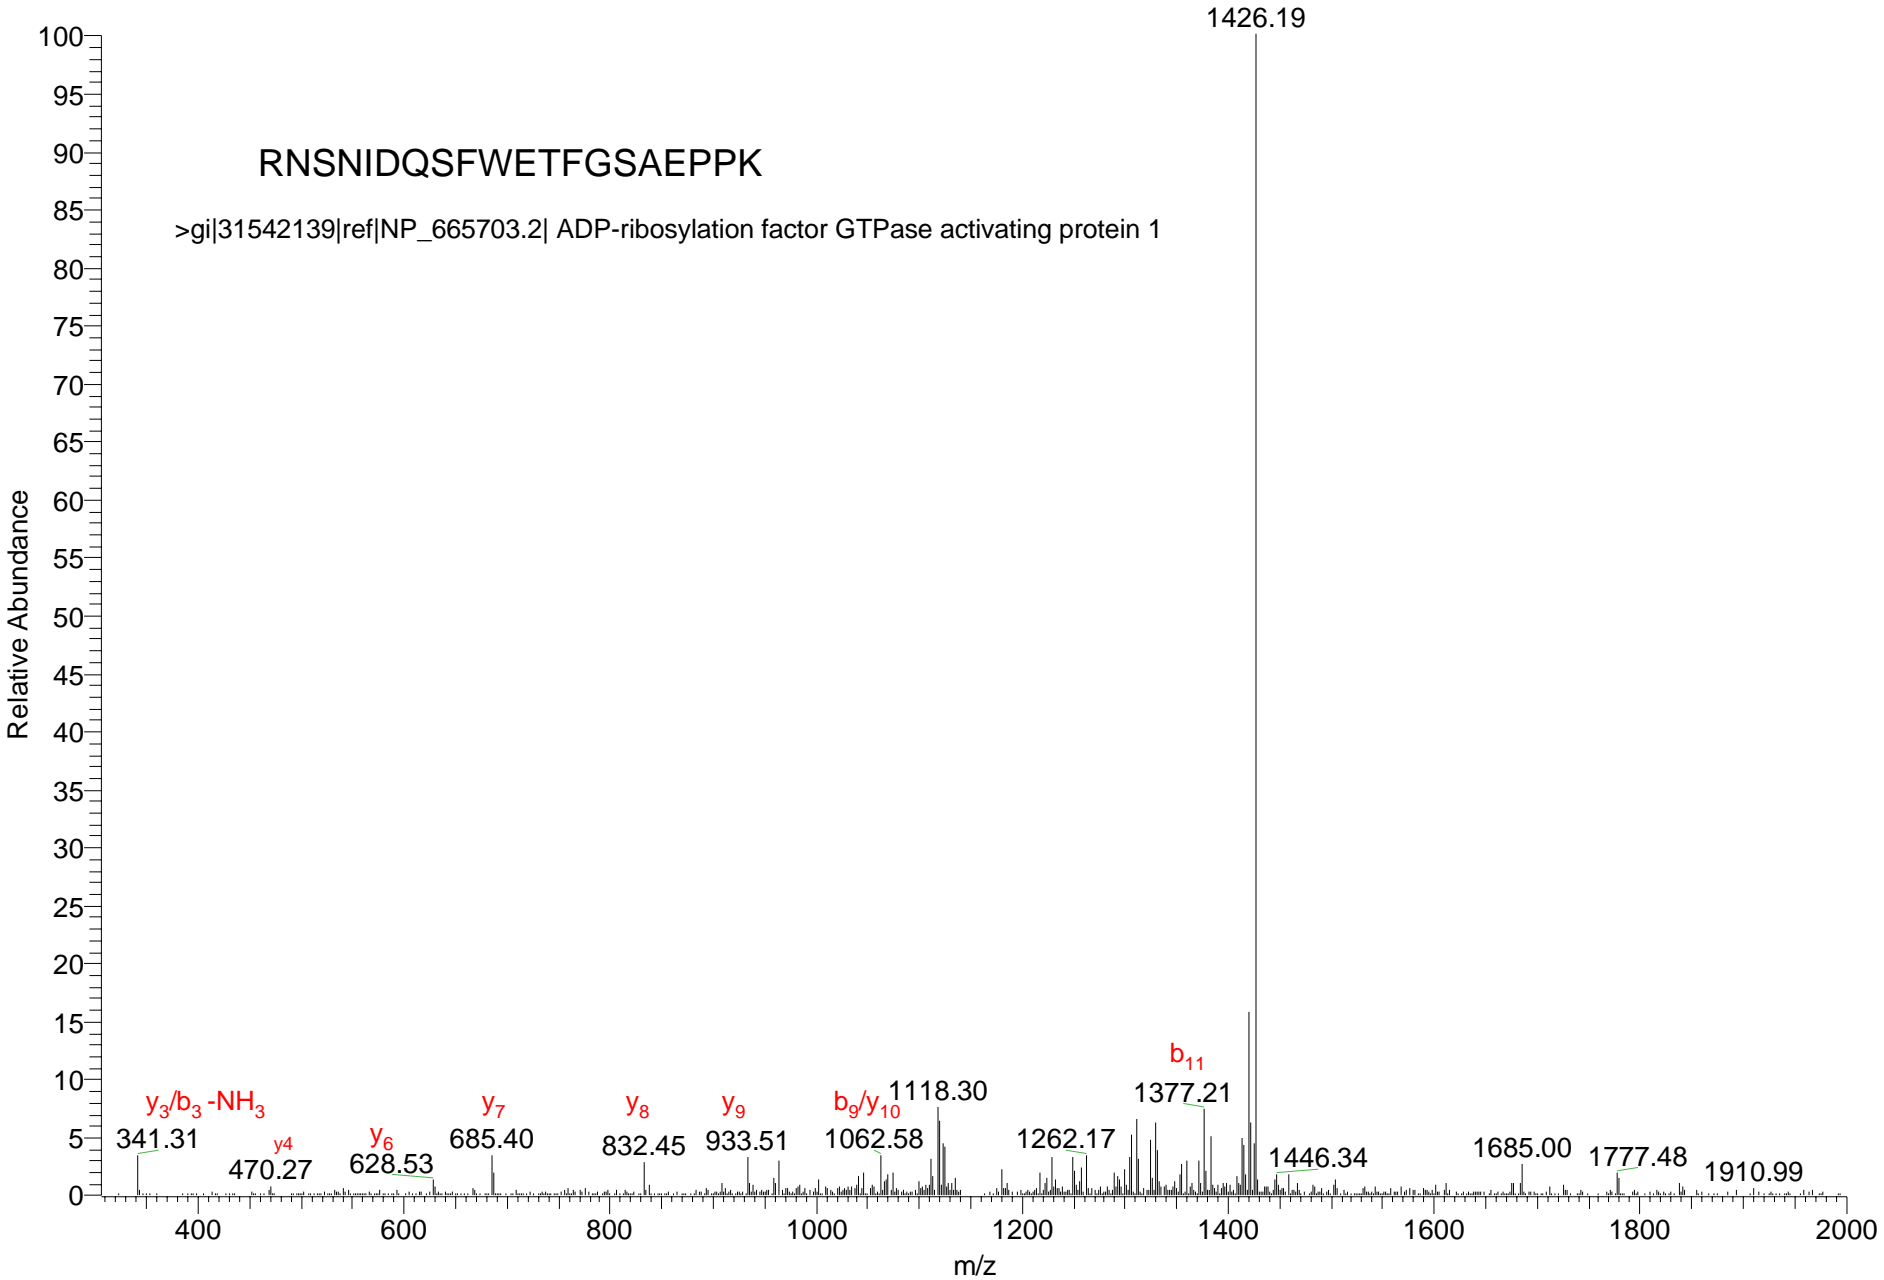

# Figure 36

RFYGGNGIVGAQVPLGAGIALACK

>gi|6679261|ref|NP\_032836.1| pyruvate dehydrogenase E1 alpha 1

Relative Abundance

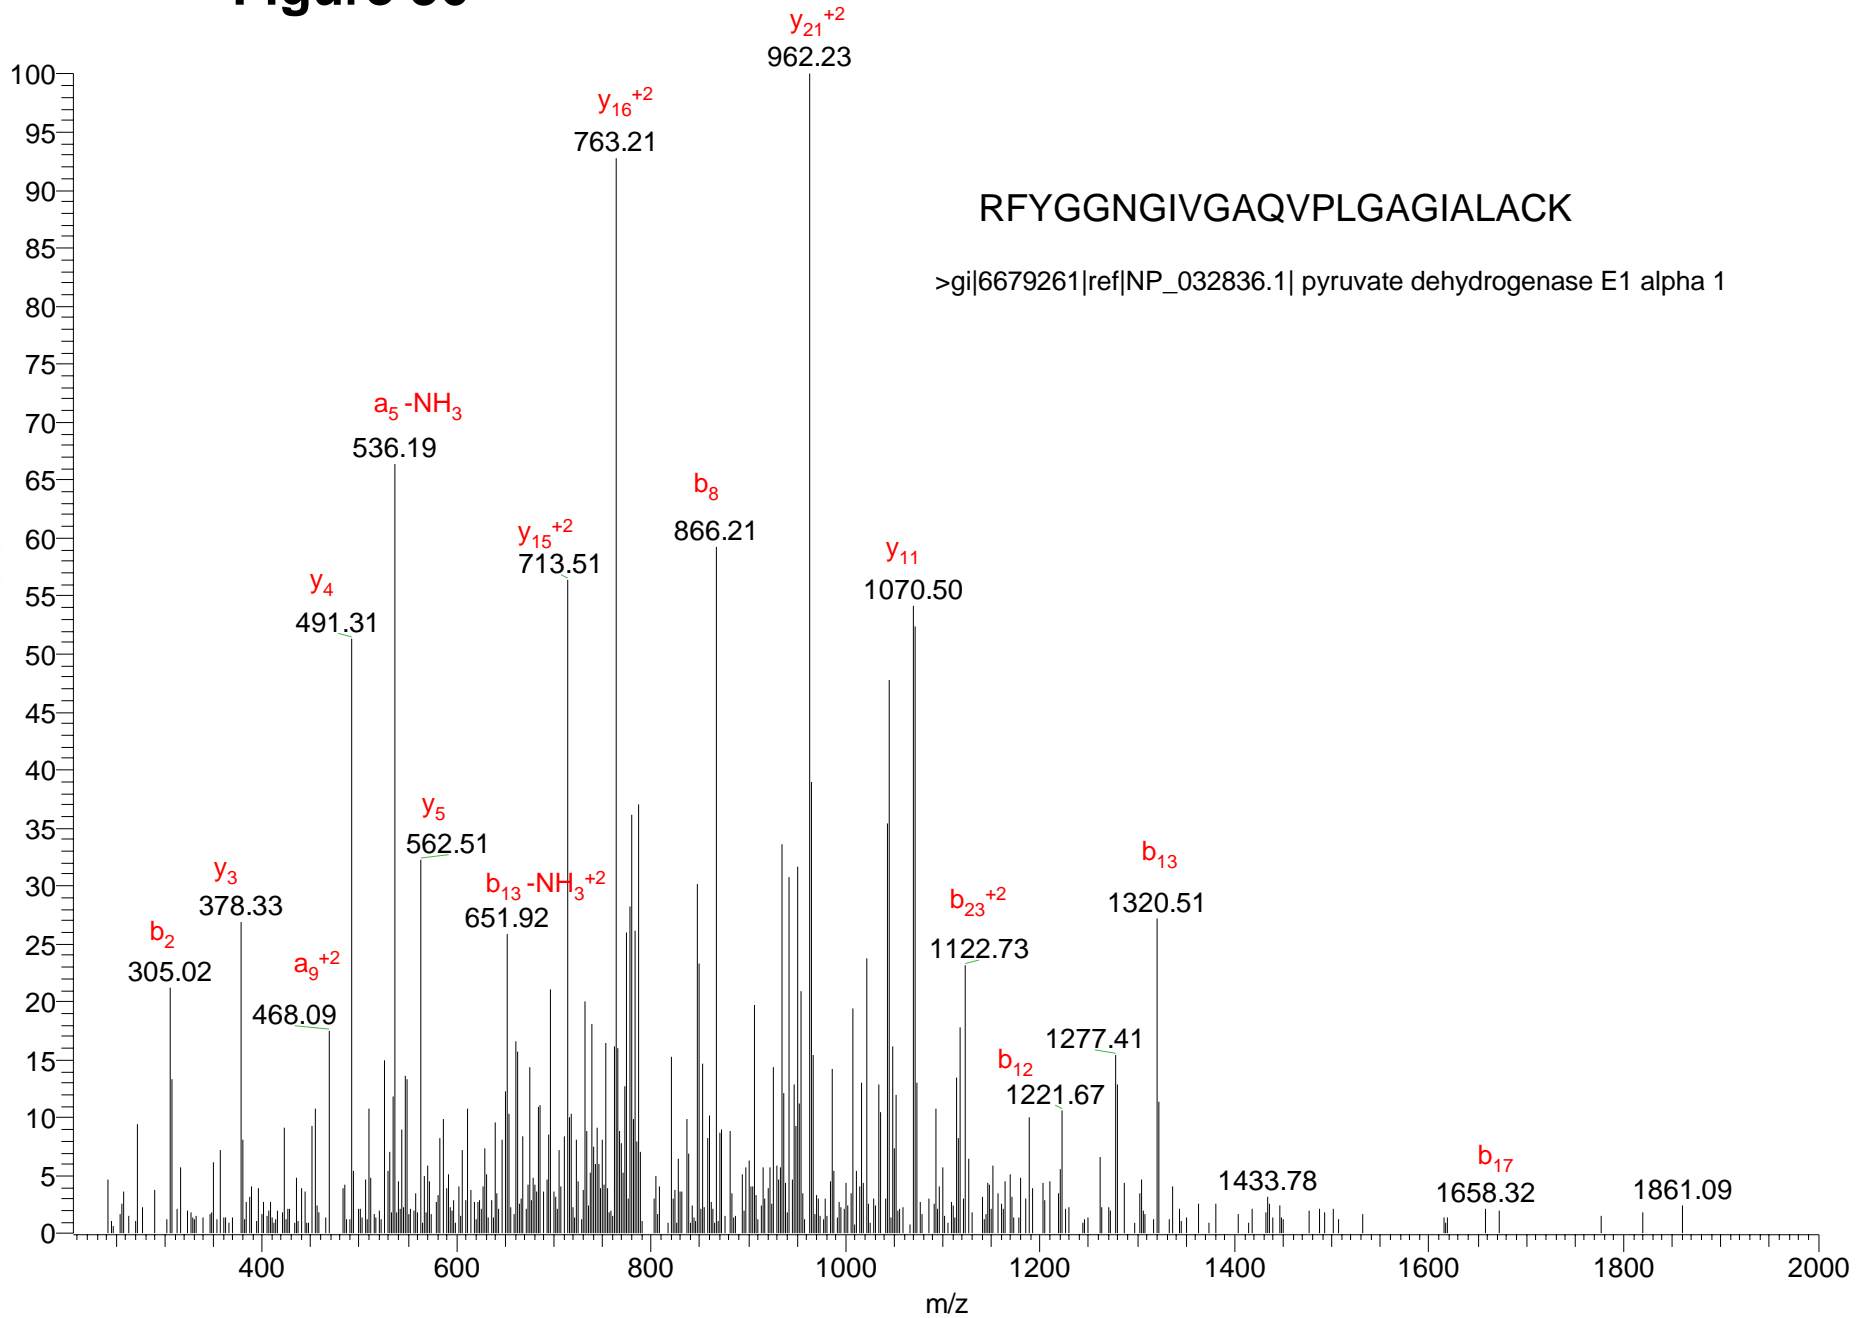

# Figure 37

>gi|20137006|ref|NP\_071855.1| myosin, heavy polypeptide 9, non-muscle isoform 1

RLPIYSEEIVEMYK

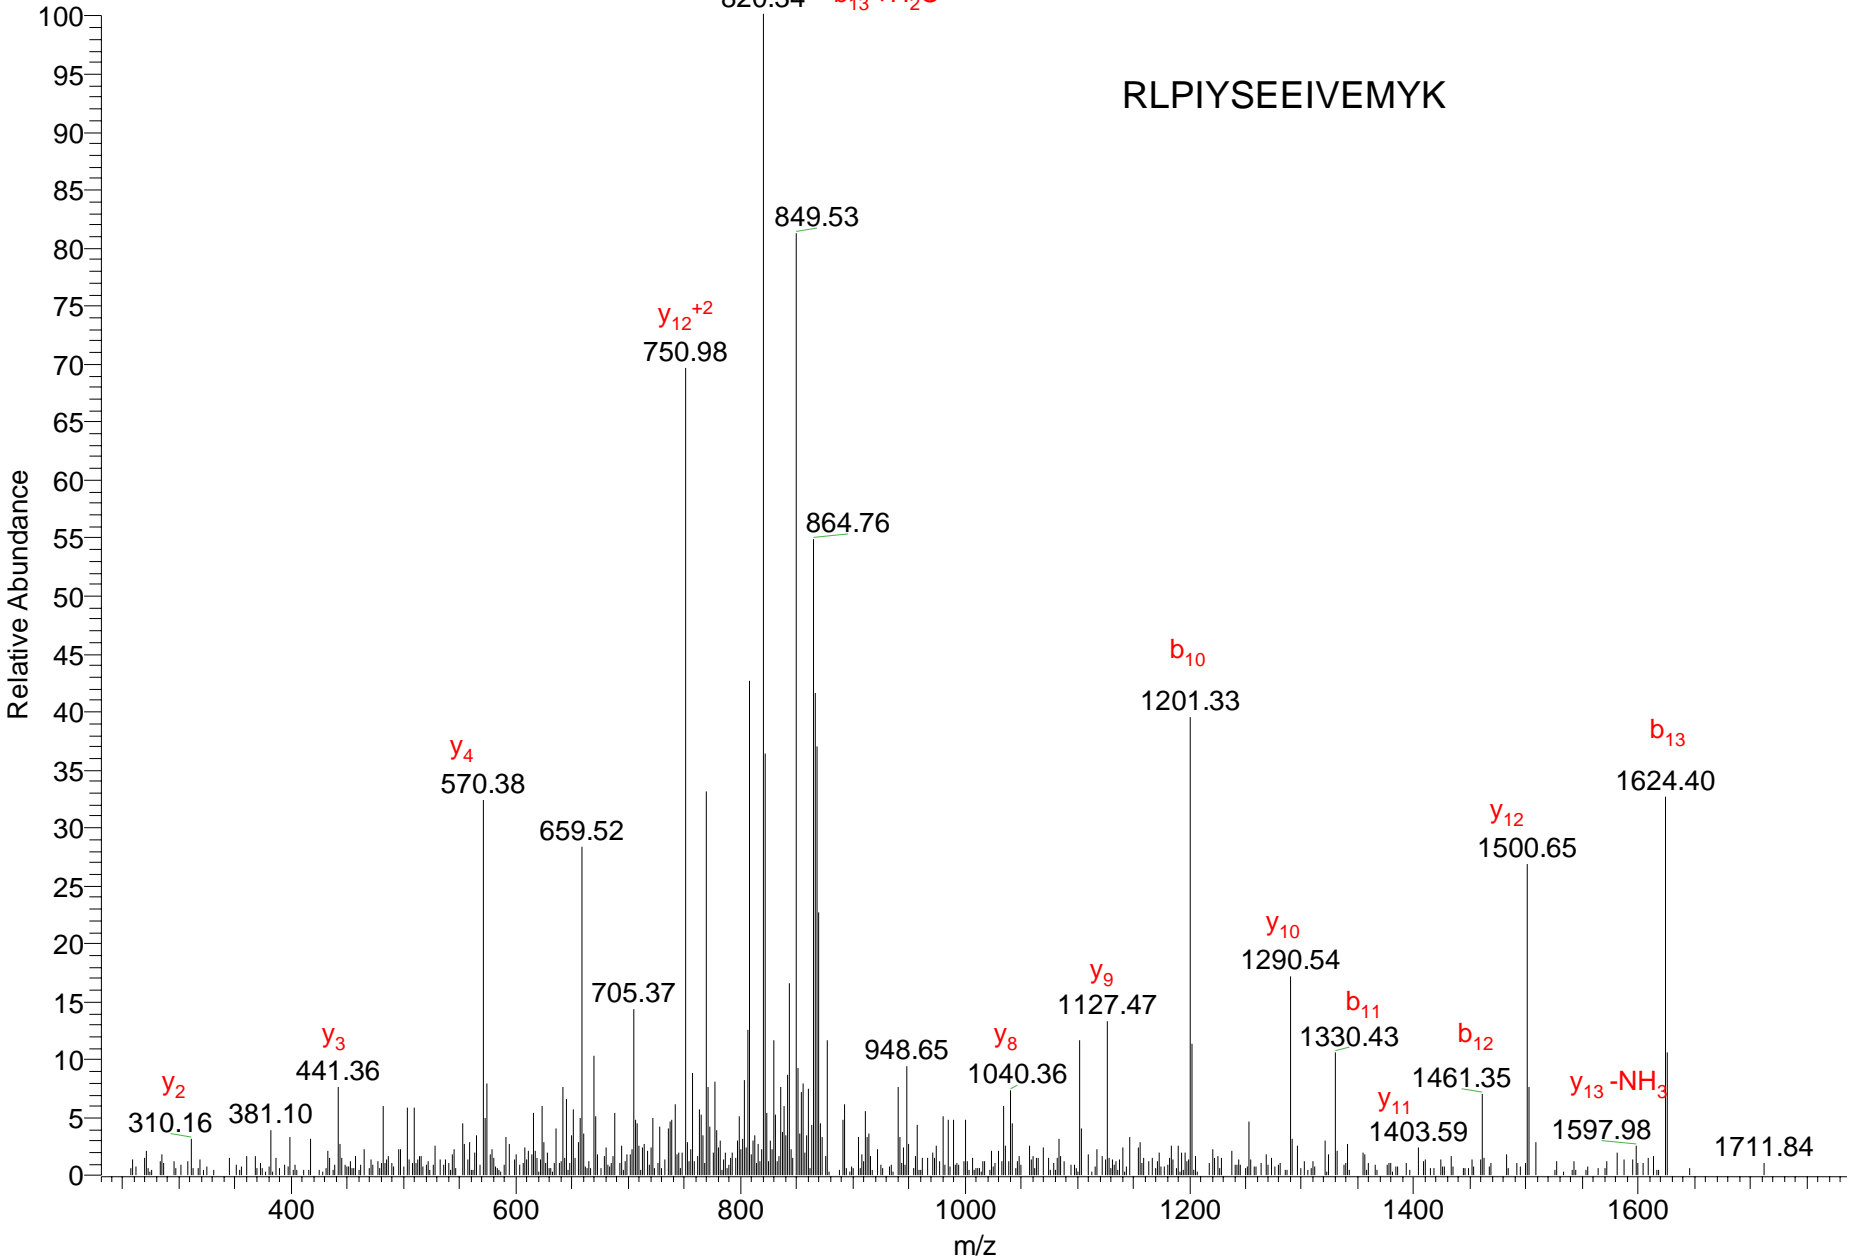

# Figure 38

>gi|6677833|ref|NP\_033138.1| S100 calcium binding protein A10 (calpactin)

RSQMEHAMETMMLTFHR

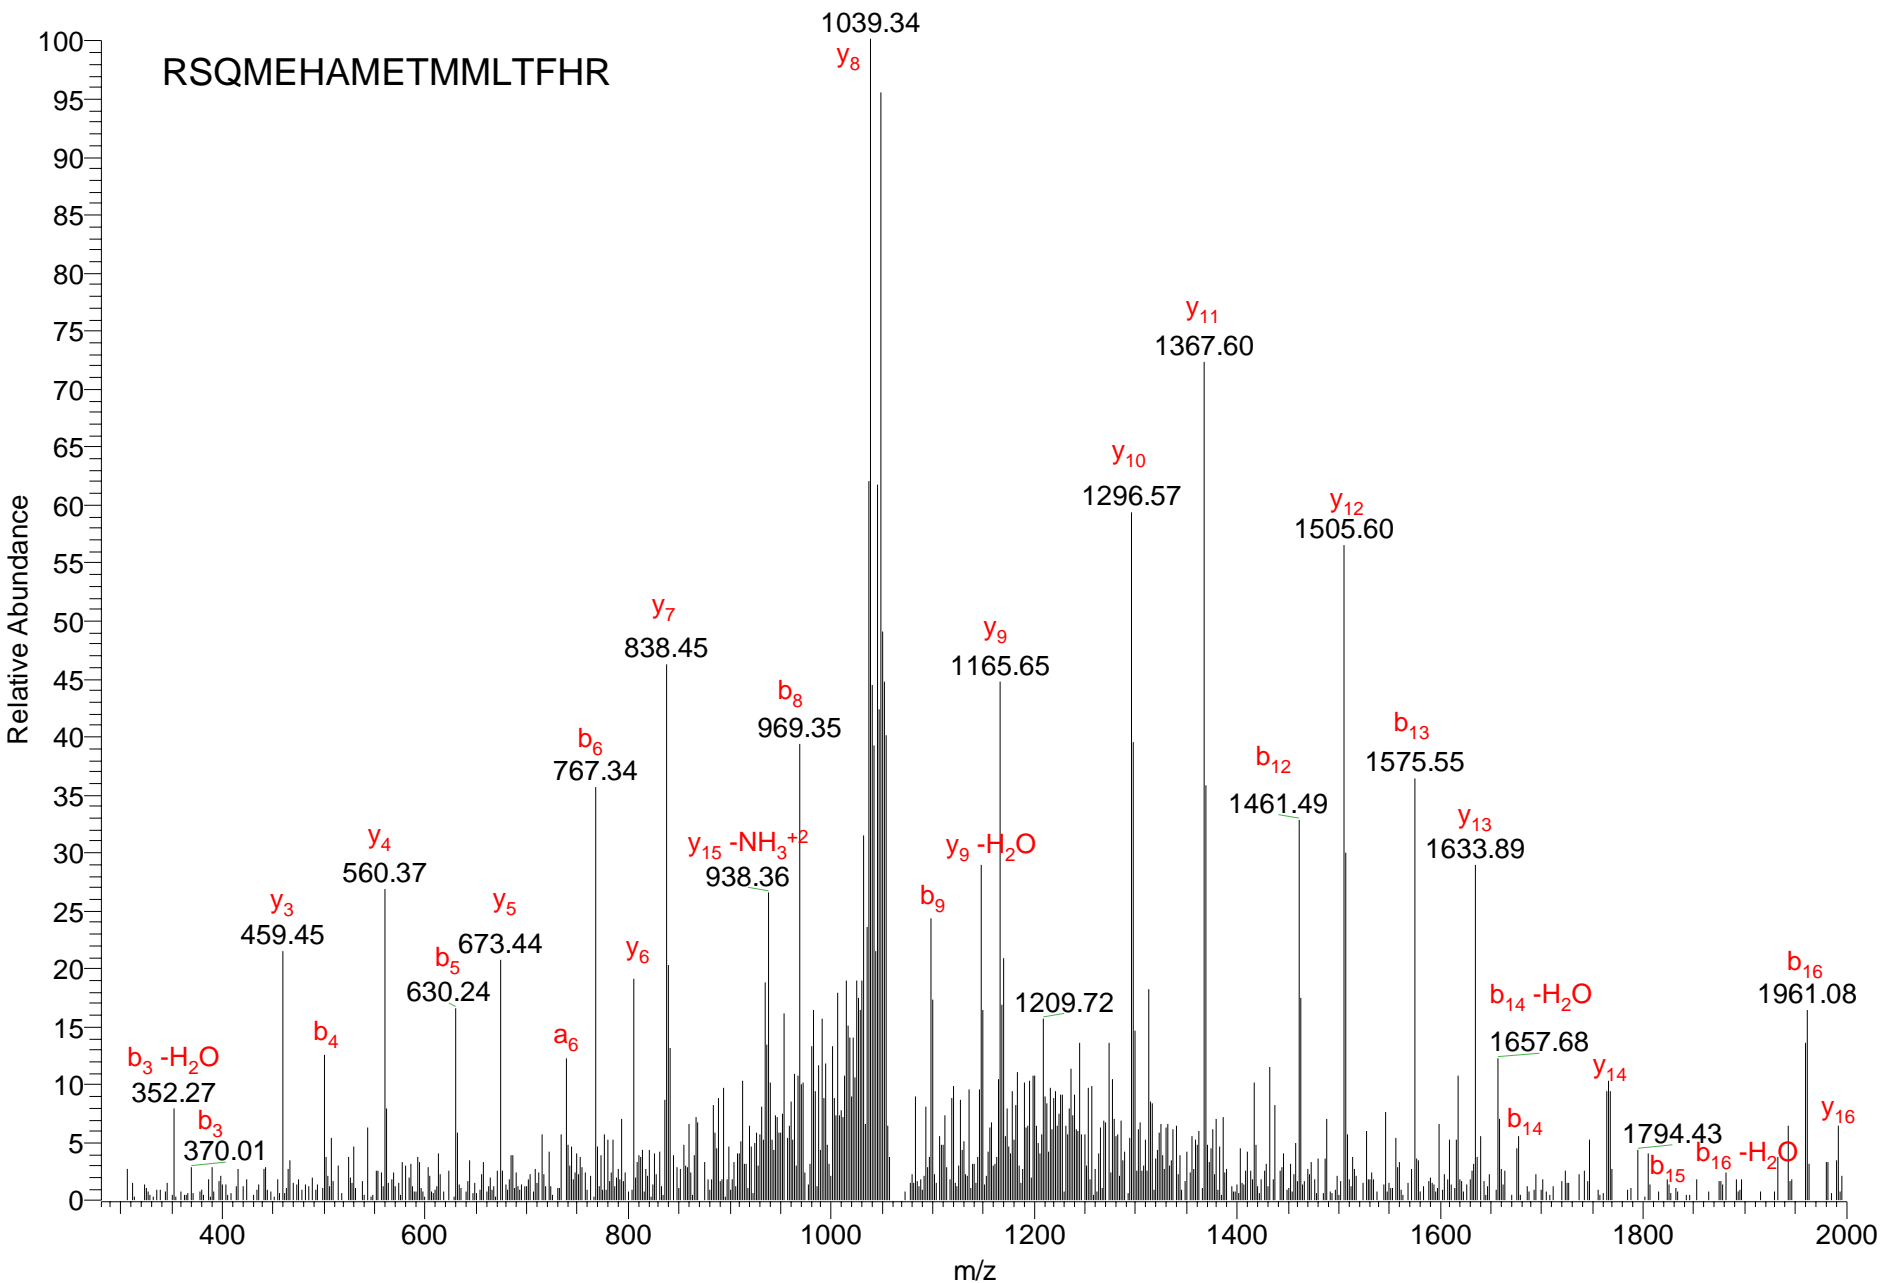

# Figure 39

RWIGLAEAMGTLMHAWAGSPK

>gi|52353955|ref|NP\_058662.2| 3-phosphoglycerate dehydrogenase

Relative Abundance

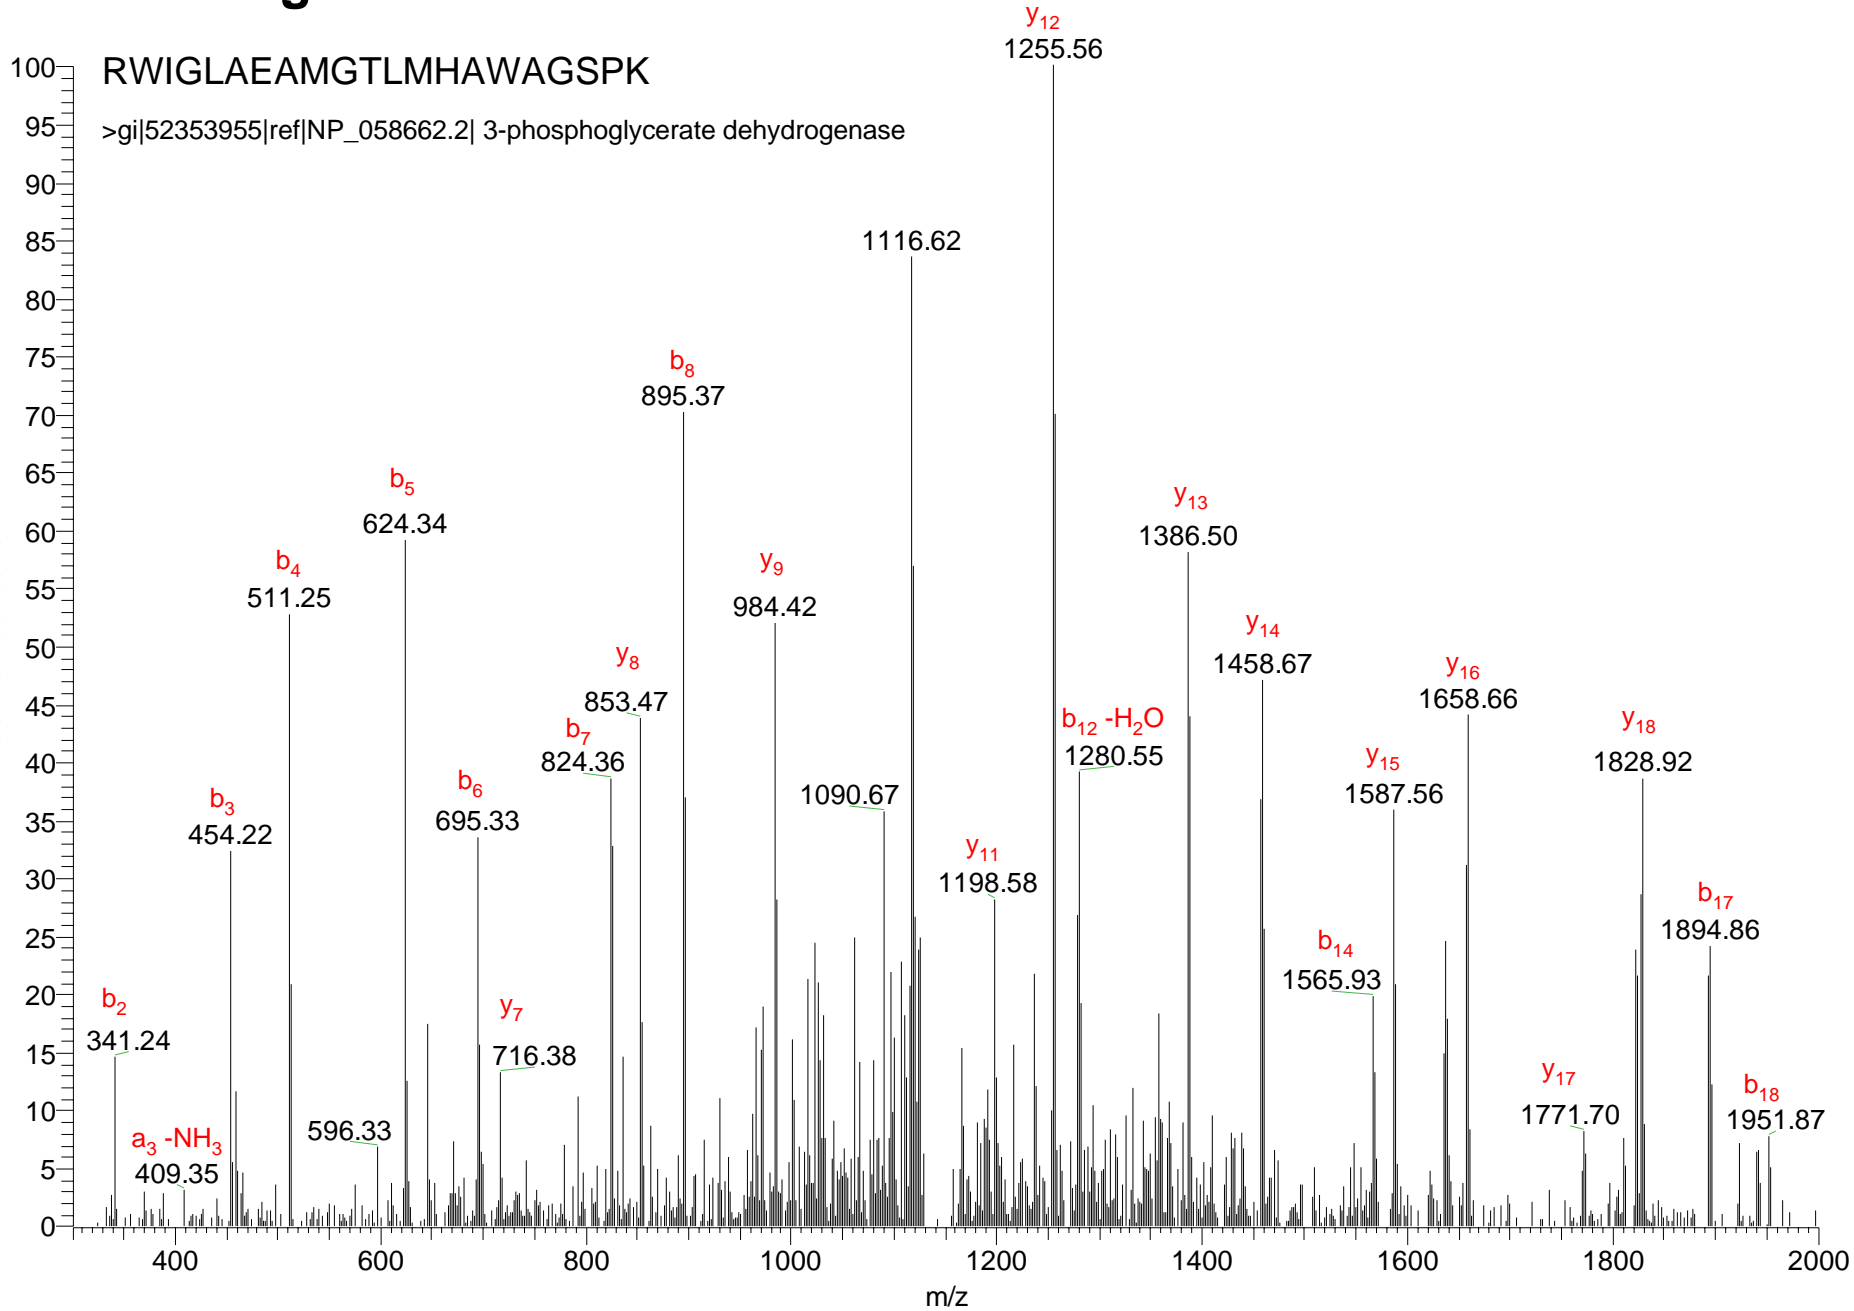



# Figure 40

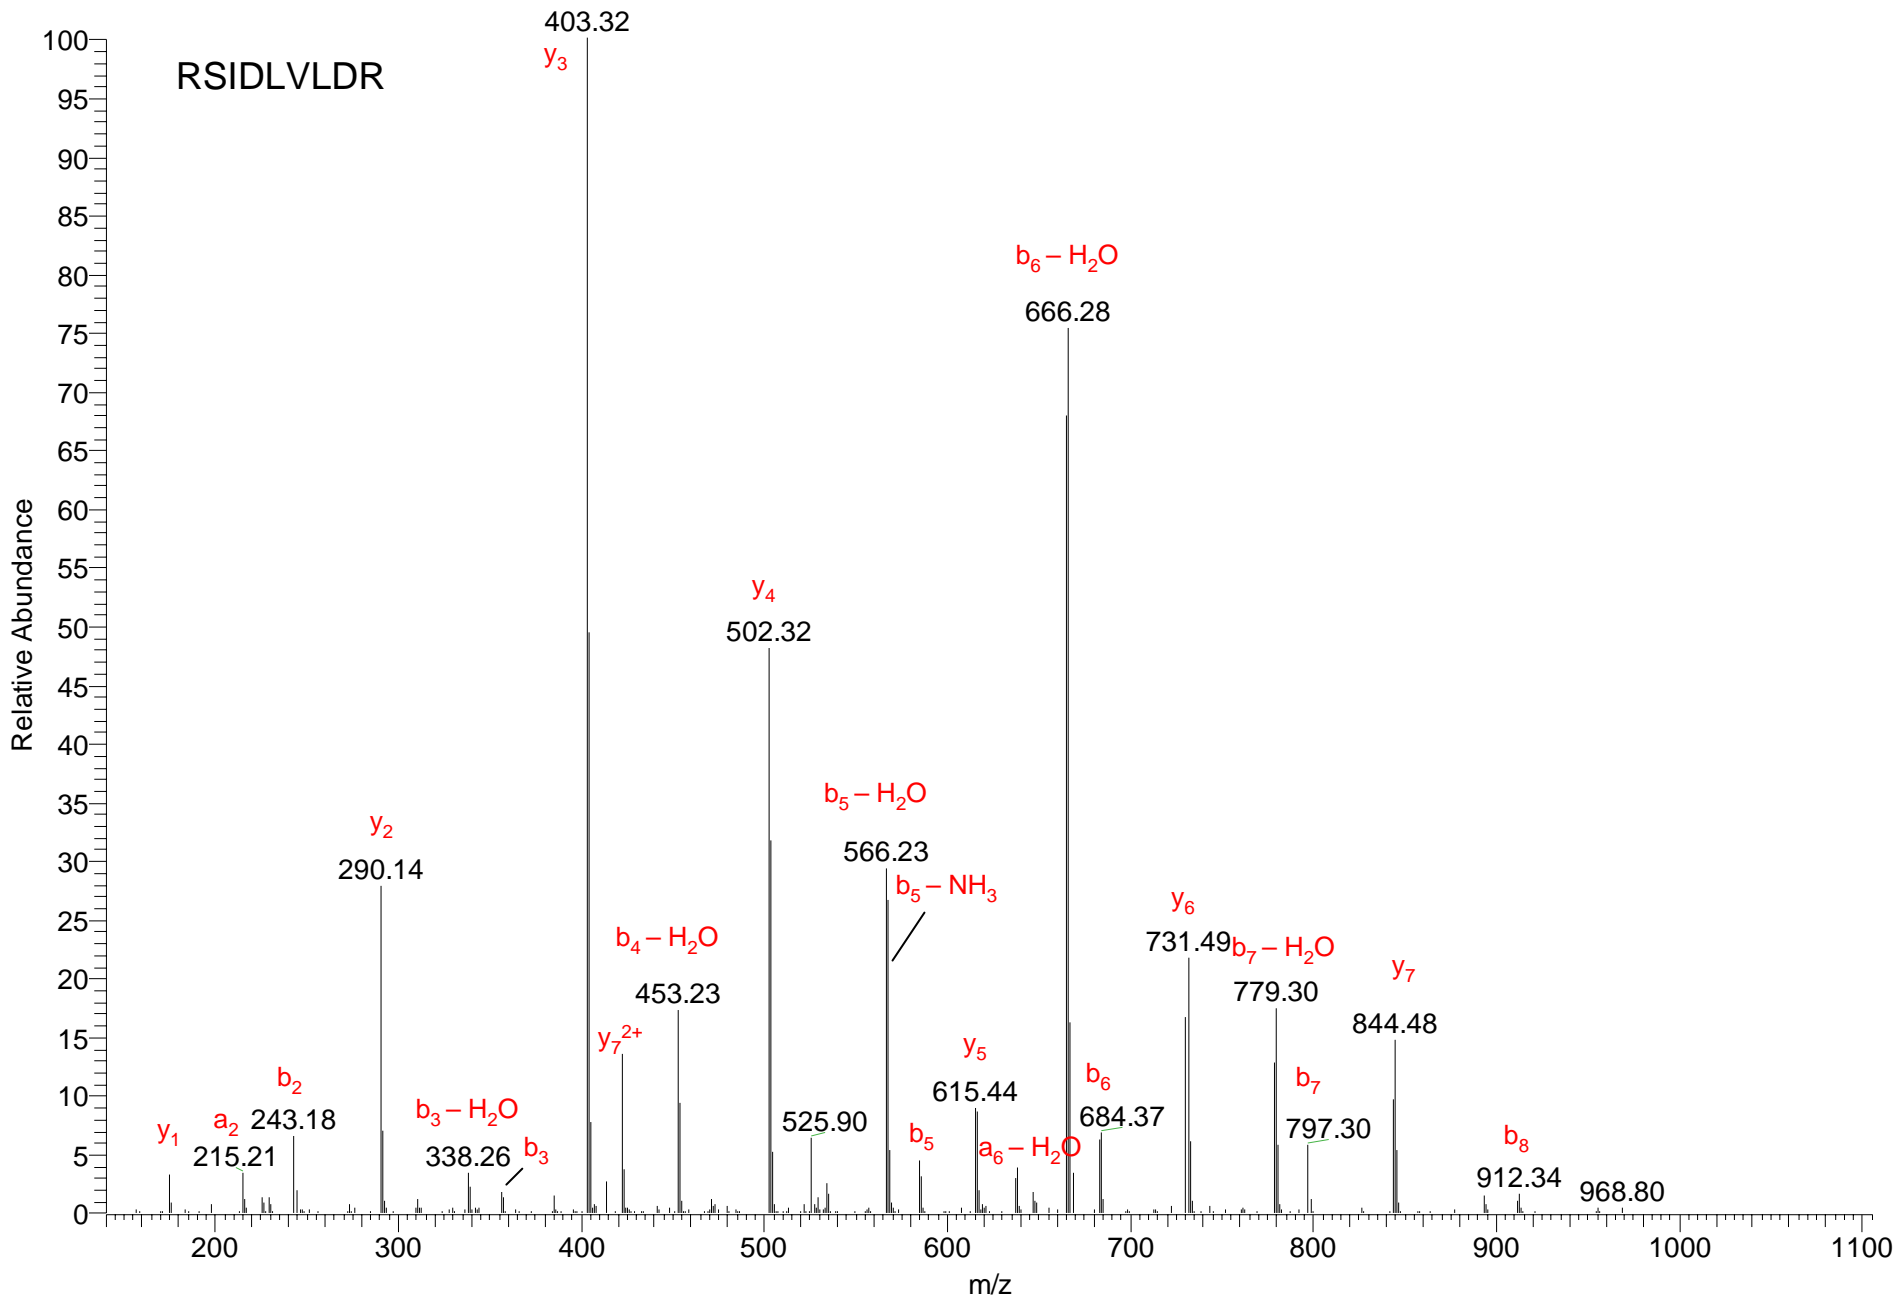

# Figure 41

RGEAGVTLGQPHLSR

>gi|7674081|sp|Q9Z0N2|IF2H\_MOUSE Eukaryotic translation initiation factor 2 subunit 3, Y-linked (Eukaryotic translation initiation factor 2 gamma subunit, Y-linked) (eIF-2-gamma Y)

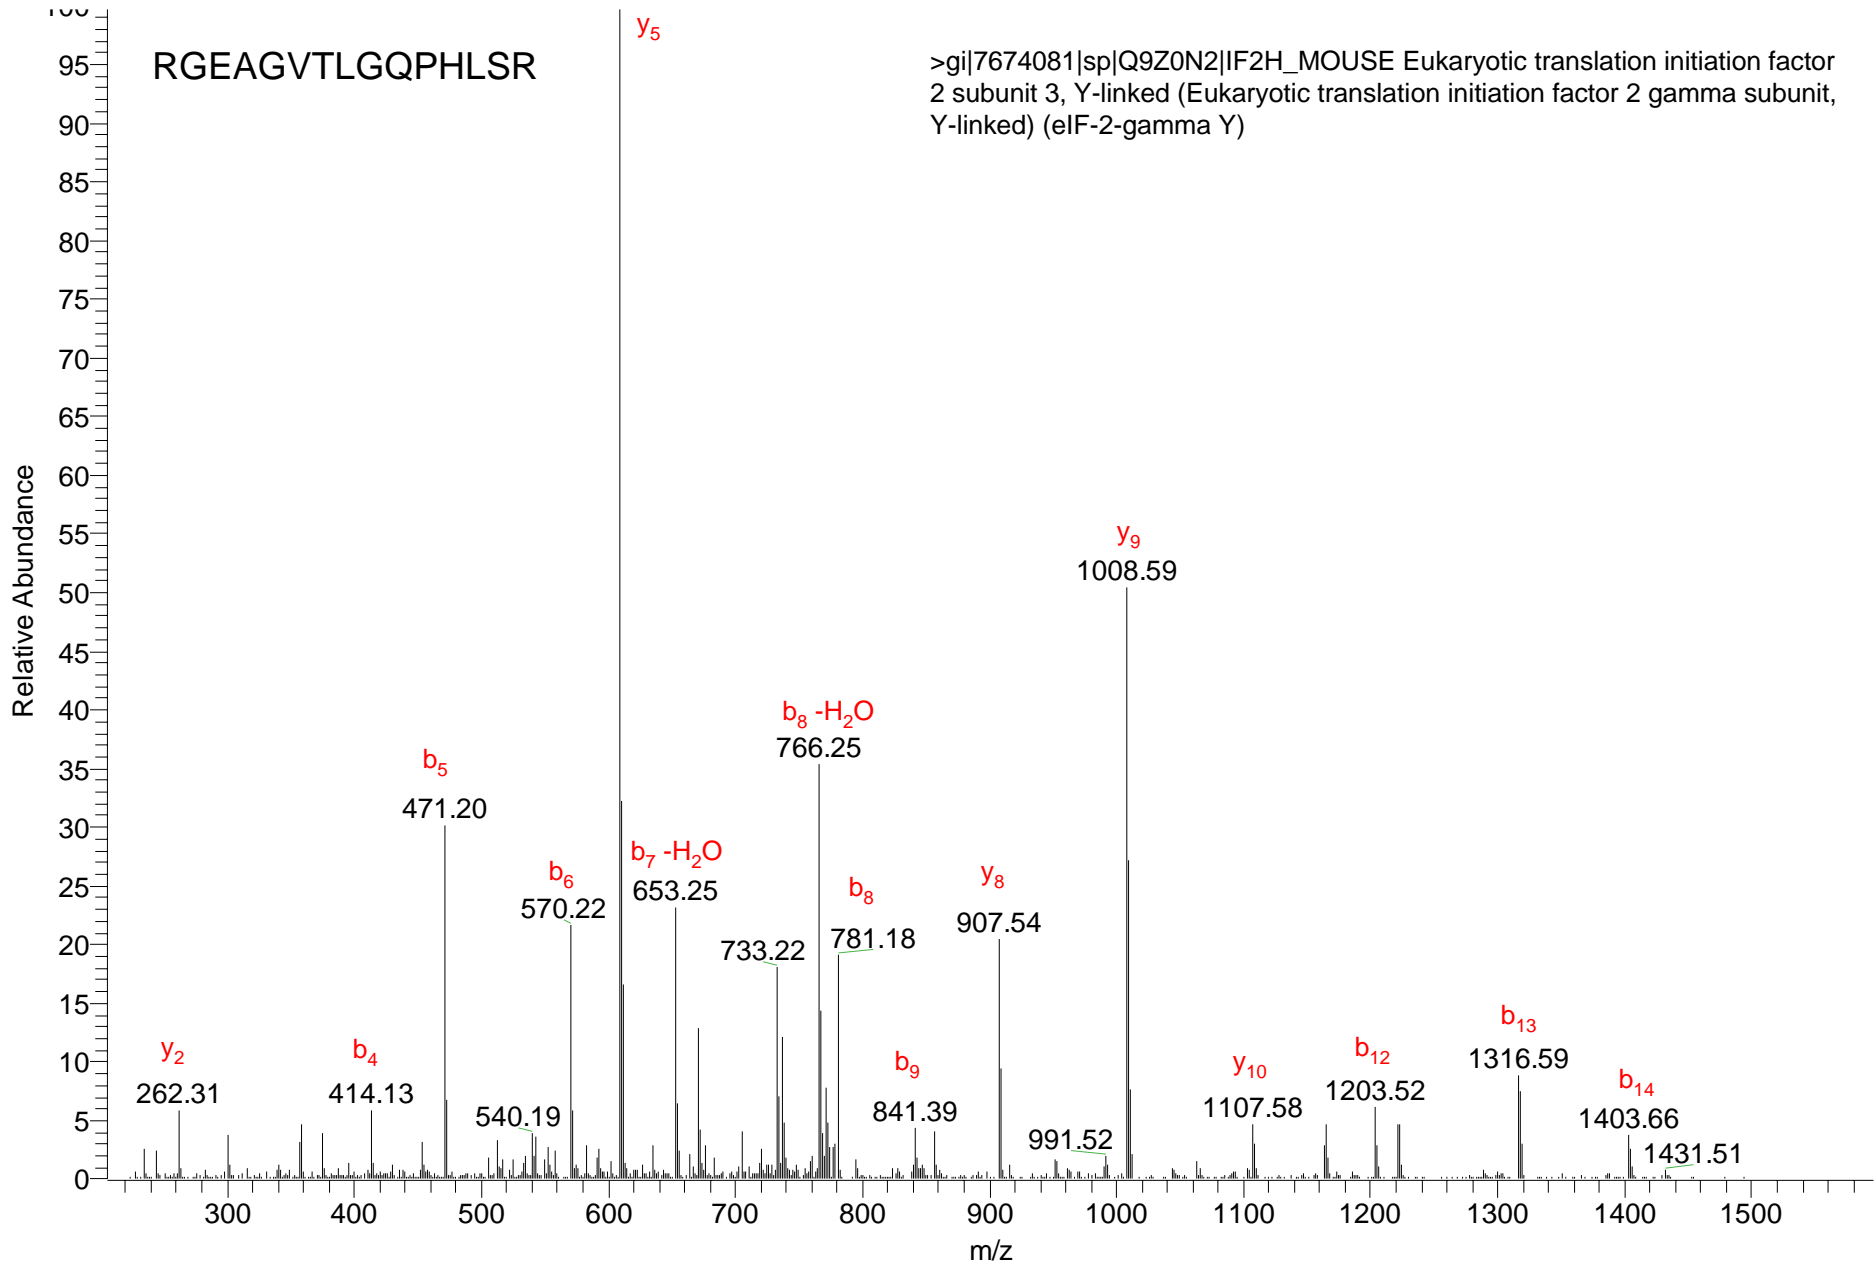

# Figure 42

RSEAGAEYVVESTGVFTTMEK

>gi|94406246|ref|XP\_999161.1| PREDICTED: similar to  
Glyceraldehyde-3-phosphate dehydrogenase (GAPDH)

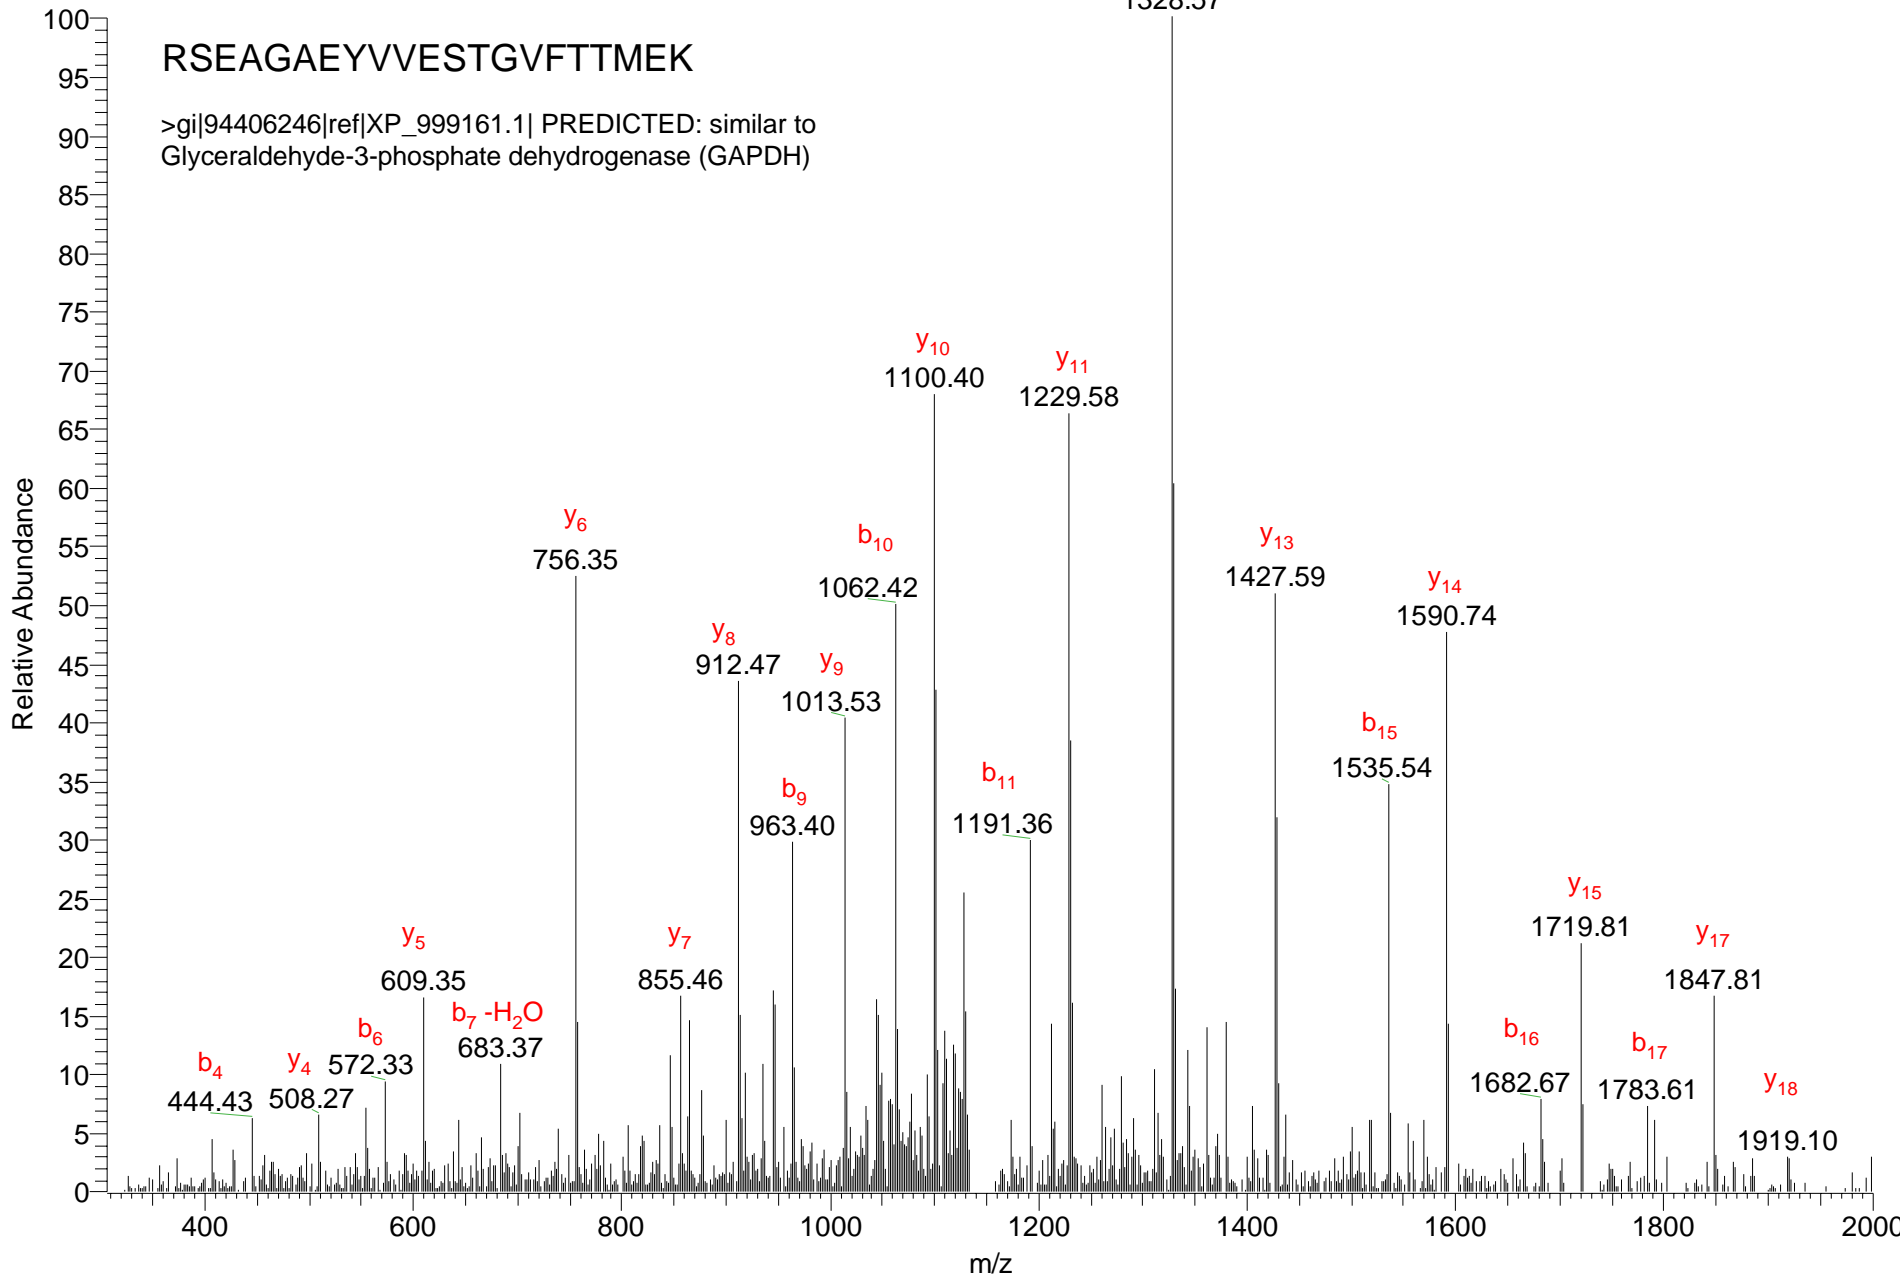

# Figure 43

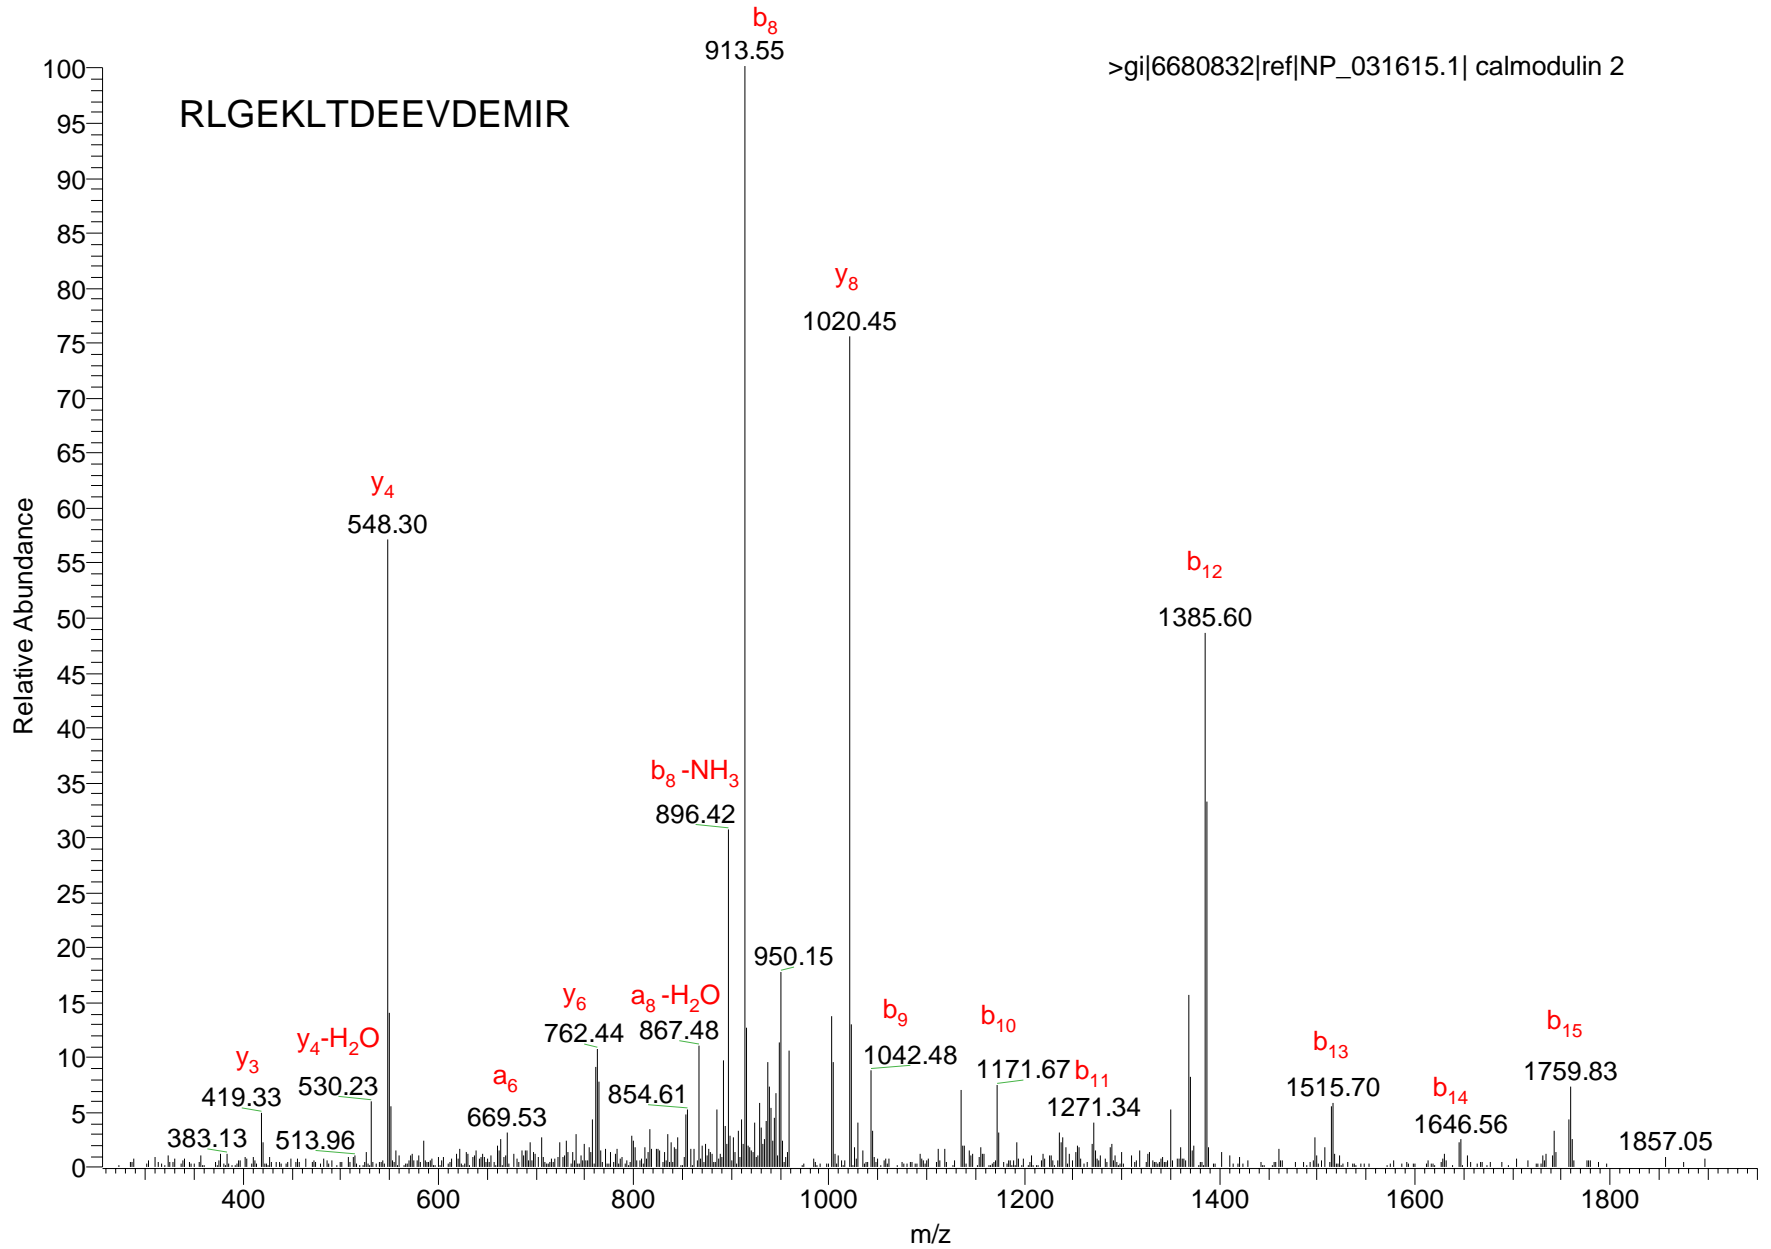

# Figure 44

RCMGQIICNLGDNLGPDLSENTLQIFLER

>gi|94388698|ref|XP\_125901.7| PREDICTED: TBP-interacting protein isoform 1

Relative Abundance

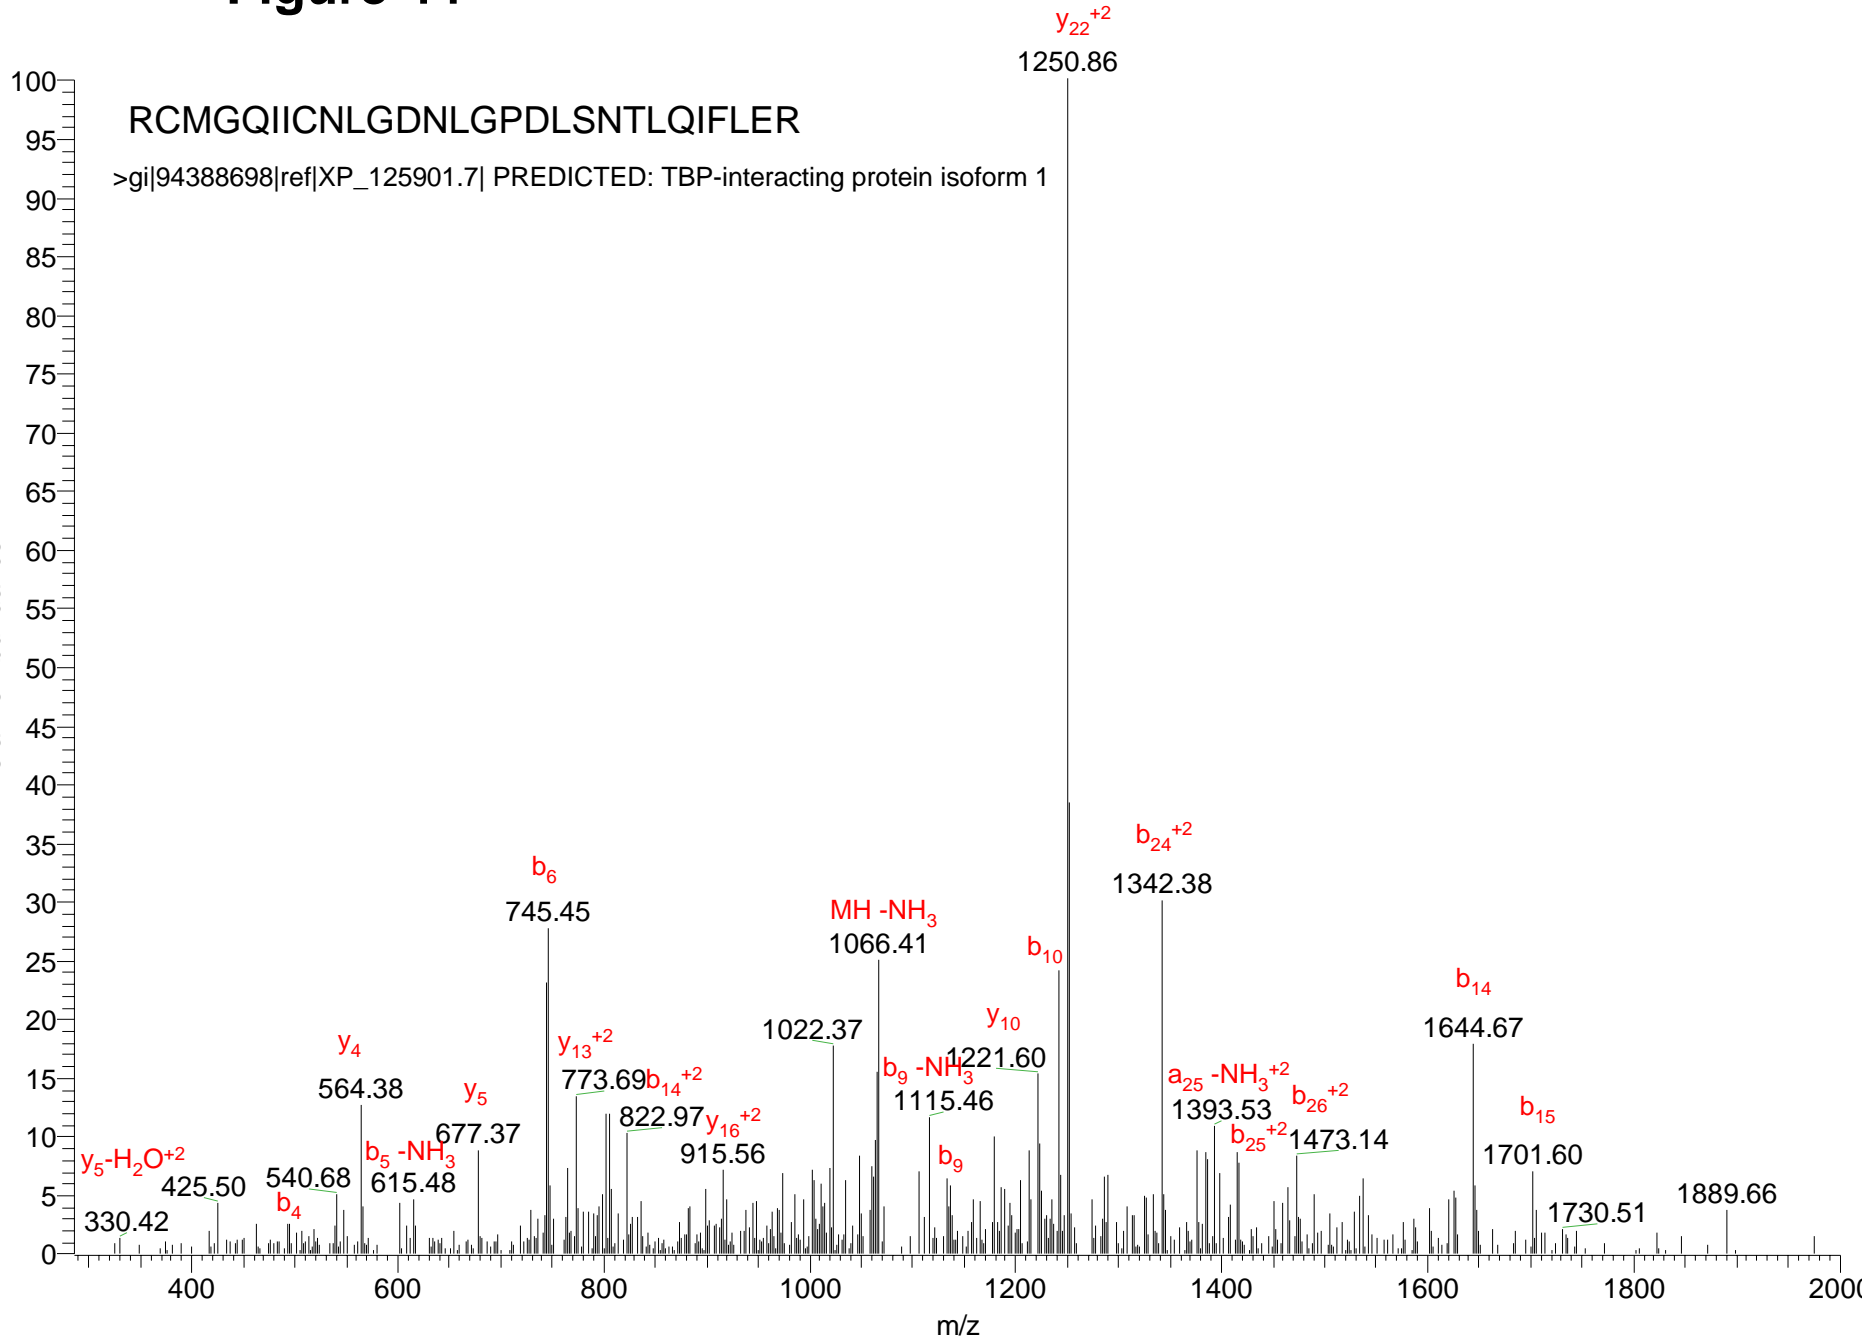

Supplement: pbio.0050258.sd001.pdf [file pbio.0050258.sd001.pdf]
