# Supplementary material
Source: PubMed Central journal article supplement (PMC2043024)

Fig. S1. Frequencies of occurrence of different amino acids in the arginylated position and 20 flanking positions on each side of the arginylated residue calculated with the online WebLogo tool. Letter size corresponds to the frequency of the residue occurrence in each position adjusted to the total frequency of its occurrence in vivo.

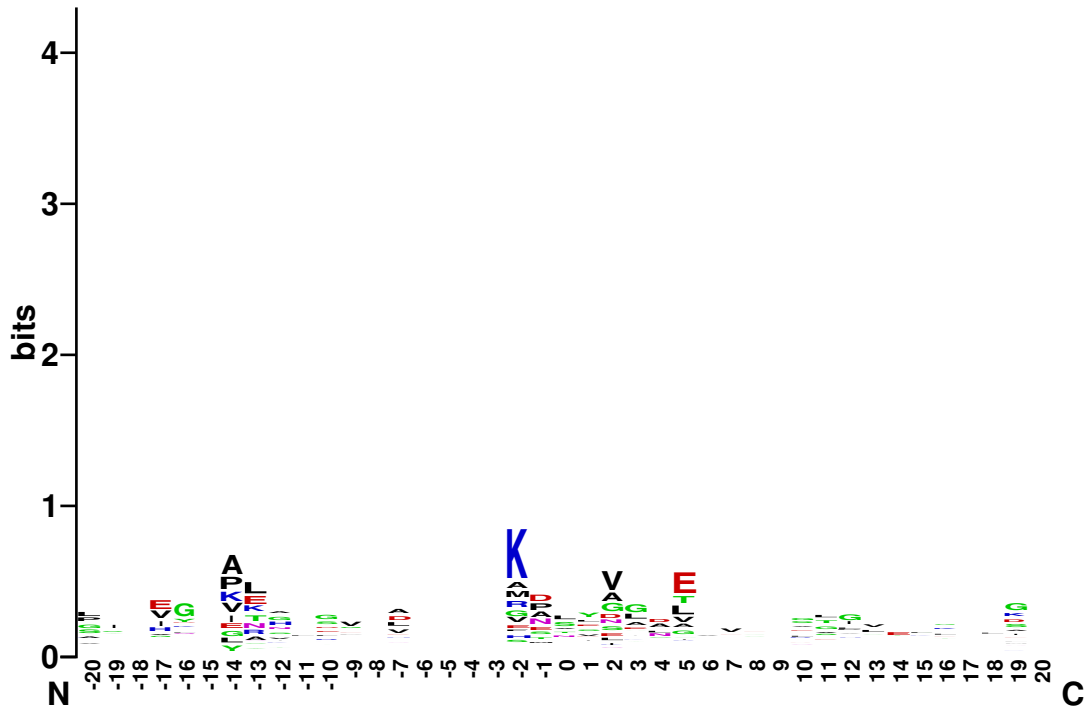

Supplement: pbio.0050258.sg001.pdf [file pbio.0050258.sg001.pdf]
